# Supplementary material for: Synthesis of chromone-containing polycyclic compounds via palladium-catalyzed [2 + 2 + 1] annulation
Source: Royal Society of Chemistry journal article supplement (doi:10.1039/c9ob02690h), 2020-01-01

# Synthesis of chromone-containing polycyclic compounds *via* palladium-catalyzed [2+2+1] annulation

Mi-Zhuan Li,<sup>ac</sup> Qi Tong,<sup>a</sup> Wen-Yong Han,<sup>ab\*</sup> Si-Yi Yang,<sup>a</sup> Bao-Dong Cui,<sup>ab</sup> Nan-Wei Wan<sup>ab</sup> and  
Yong-Zheng Chen<sup>ab\*</sup>

<sup>a</sup> Key Laboratory of Biocatalysis & Chiral Drug Synthesis of Guizhou Province, Generic Drug Research Center of Guizhou Province, Green Pharmaceuticals Engineering Research Center of Guizhou Province, School of Pharmacy, Zunyi Medical University, Zunyi 563006, P. R. China

<sup>b</sup> Key Laboratory of Basic Pharmacology of Ministry of Education and Joint International Research Laboratory of Ethnomedicine of Ministry of Education, Zunyi Medical University, Zunyi 563006, P. R. China

<sup>c</sup> School of Public Health, Zunyi Medical University, Zunyi 563006, P. R. China

E-mail: hanwy@zmu.edu.cn; yzchen@zmu.edu.cn

## Electronic Supplementary Information

### Table of Contents

|                                                                                                                                    |     |
|------------------------------------------------------------------------------------------------------------------------------------|-----|
| 1. General experimental information .....                                                                                          | S1  |
| 2. Optimization of the reaction conditions .....                                                                                   | S1  |
| 3. Representative procedure for the synthesis of compound (±)- <b>4a</b> . .....                                                   | S4  |
| 4. Characterization data of compounds (±)- <b>4a–af</b> .....                                                                      | S4  |
| 5. Preparative-scale experiment of compound (±)- <b>4a</b> .....                                                                   | S22 |
| 6. X-ray crystal data for compounds (±)- <b>4a</b> , (±)- <b>4v</b> , (±)- <b>4z</b> , (±)- <b>4ad</b> , and (±)- <b>4af</b> ..... | S23 |
| 7. <sup>1</sup> H and <sup>13</sup> C NMR spectra of (±)- <b>4a–af</b> .....                                                       | S28 |

## 1. General experimental information

Unless otherwise noted, all commercially available reagents were used without further purification. All of the solvents were treated according to known methods. Column chromatography was performed on silica gel (200-400 mesh). <sup>1</sup>H NMR (400 MHz) chemical shifts were reported in ppm ( $\delta$ ) relative to tetramethylsilane (TMS) with the solvent resonance employed as the internal standard. <sup>13</sup>C NMR (100 MHz) chemical shifts were reported in ppm ( $\delta$ ) from tetramethylsilane (TMS) with the solvent resonance as the internal standard. Data were reported as follows: chemical shift, multiplicity (s = singlet, br s = broad singlet, d = doublet, t = triplet, q = quartet, dd = doublet of doublets, td = triplet of doublets, qd = quartet of doublets, ddd = doublet of doublet of doublets, m = multiplet), coupling constants (Hz) and integration. HRMS measurements were obtained on a TOF analyzer. Melting points were uncorrected.

3-Iodochromones (**1**) was prepared according to the reported procedures.<sup>1</sup>  $\alpha$ -Bromoacetophenones (**2**) and TCD (**3**) were purchased from commercial suppliers.

(1) D. A. Vasselin, A. D. Westwell, C. S. Matthews, T. D. Bradshaw and M. F. G. Stevens, *J. Med. Chem.*, 2006, **49**, 3973.

## 2. Optimization of the reaction conditions<sup>a</sup>

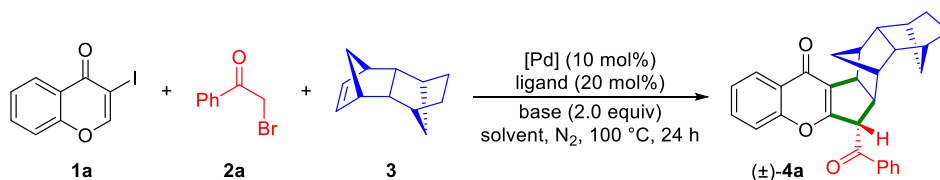

| Entry | Catalyst                                                          | Ligand    | Base                           | Solvent    | Yield (%) <sup>b</sup> | dr <sup>c</sup> |
|-------|-------------------------------------------------------------------|-----------|--------------------------------|------------|------------------------|-----------------|
| 1     | Pd(OPiv) <sub>2</sub>                                             | <b>L1</b> | K <sub>3</sub> PO <sub>4</sub> | mesitylene | 35                     | 99:1            |
| 2     | Pd(OAc) <sub>2</sub>                                              | <b>L1</b> | K <sub>3</sub> PO <sub>4</sub> | mesitylene | 48                     | 99:1            |
| 3     | Pd(TFA) <sub>2</sub>                                              | <b>L1</b> | K <sub>3</sub> PO <sub>4</sub> | mesitylene | 47                     | 99:1            |
| 4     | [( $\pi$ -cinnamyl)PdCl] <sub>2</sub>                             | <b>L1</b> | K <sub>3</sub> PO <sub>4</sub> | mesitylene | 19                     | 99:1            |
| 5     | PdCl <sub>2</sub> [PPh( <i>t</i> -Bu) <sub>2</sub> ] <sub>2</sub> | <b>L1</b> | K <sub>3</sub> PO <sub>4</sub> | mesitylene | 11                     | 99:1            |
| 6     | Pd(DIPHOS) <sub>2</sub>                                           | <b>L1</b> | K <sub>3</sub> PO <sub>4</sub> | mesitylene | 13                     | 99:1            |
| 7     | [Pd(dppf)Cl <sub>2</sub> ] <sub>2</sub> ·DCM                      | <b>L1</b> | K <sub>3</sub> PO <sub>4</sub> | mesitylene | 21                     | 99:1            |
| 8     | PdCl <sub>2</sub> (dppe)                                          | <b>L1</b> | K <sub>3</sub> PO <sub>4</sub> | mesitylene | 12                     | 99:1            |
| 9     | PdCl <sub>2</sub> (dppb)                                          | <b>L1</b> | K <sub>3</sub> PO <sub>4</sub> | mesitylene | 27                     | 99:1            |

|                 |                                                      |            |                                 |                   |    |      |
|-----------------|------------------------------------------------------|------------|---------------------------------|-------------------|----|------|
| 10              | [PdCl(C <sub>3</sub> H <sub>5</sub> ) <sub>2</sub> ] | <b>L1</b>  | K <sub>3</sub> PO <sub>4</sub>  | mesitylene        | 13 | 99:1 |
| 11              | Pd(PPh <sub>3</sub> ) <sub>4</sub>                   | <b>L1</b>  | K <sub>3</sub> PO <sub>4</sub>  | mesitylene        | 22 | 99:1 |
| 12              | Pd <sub>2</sub> (dba) <sub>3</sub>                   | <b>L1</b>  | K <sub>3</sub> PO <sub>4</sub>  | mesitylene        | 31 | 99:1 |
| 13              | Pd(OAc) <sub>2</sub>                                 | <b>L2</b>  | K <sub>3</sub> PO <sub>4</sub>  | mesitylene        | 26 | 99:1 |
| 14              | Pd(OAc) <sub>2</sub>                                 | <b>L3</b>  | K <sub>3</sub> PO <sub>4</sub>  | mesitylene        | 40 | 99:1 |
| 15              | Pd(OAc) <sub>2</sub>                                 | <b>L4</b>  | K <sub>3</sub> PO <sub>4</sub>  | mesitylene        | 44 | 99:1 |
| 16              | Pd(OAc) <sub>2</sub>                                 | <b>L5</b>  | K <sub>3</sub> PO <sub>4</sub>  | mesitylene        | 40 | 99:1 |
| 17              | Pd(OAc) <sub>2</sub>                                 | <b>L6</b>  | K <sub>3</sub> PO <sub>4</sub>  | mesitylene        | 50 | 99:1 |
| 18              | Pd(OAc) <sub>2</sub>                                 | <b>L7</b>  | K <sub>3</sub> PO <sub>4</sub>  | mesitylene        | 37 | 99:1 |
| 19              | Pd(OAc) <sub>2</sub>                                 | <b>L8</b>  | K <sub>3</sub> PO <sub>4</sub>  | mesitylene        | 37 | 99:1 |
| 20              | Pd(OAc) <sub>2</sub>                                 | <b>L9</b>  | K <sub>3</sub> PO <sub>4</sub>  | mesitylene        | 18 | 99:1 |
| 21              | Pd(OAc) <sub>2</sub>                                 | <b>L10</b> | K <sub>3</sub> PO <sub>4</sub>  | mesitylene        | 21 | 99:1 |
| 22              | Pd(OAc) <sub>2</sub>                                 | <b>L11</b> | K <sub>3</sub> PO <sub>4</sub>  | mesitylene        | 36 | 99:1 |
| 23              | Pd(OAc) <sub>2</sub>                                 | <b>L12</b> | K <sub>3</sub> PO <sub>4</sub>  | mesitylene        | 32 | 99:1 |
| 24              | Pd(OAc) <sub>2</sub>                                 | <b>L13</b> | K <sub>3</sub> PO <sub>4</sub>  | mesitylene        | 18 | 99:1 |
| 25              | Pd(OAc) <sub>2</sub>                                 | <b>L14</b> | K <sub>3</sub> PO <sub>4</sub>  | mesitylene        | 4  | –    |
| 26              | Pd(OAc) <sub>2</sub>                                 | <b>L15</b> | K <sub>3</sub> PO <sub>4</sub>  | mesitylene        | 2  | –    |
| 27              | Pd(OAc) <sub>2</sub>                                 | <b>L16</b> | K <sub>3</sub> PO <sub>4</sub>  | mesitylene        | 29 | 99:1 |
| 28              | Pd(OAc) <sub>2</sub>                                 | <b>L17</b> | K <sub>3</sub> PO <sub>4</sub>  | mesitylene        | 18 | 99:1 |
| 29              | Pd(OAc) <sub>2</sub>                                 | <b>L6</b>  | Cs <sub>2</sub> CO <sub>3</sub> | mesitylene        | 16 | 99:1 |
| 30              | Pd(OAc) <sub>2</sub>                                 | <b>L6</b>  | Na <sub>2</sub> CO <sub>3</sub> | mesitylene        | 16 | 99:1 |
| 31              | Pd(OAc) <sub>2</sub>                                 | <b>L6</b>  | K <sub>2</sub> CO <sub>3</sub>  | mesitylene        | 53 | 99:1 |
| 32              | Pd(OAc) <sub>2</sub>                                 | <b>L6</b>  | NaHCO <sub>3</sub>              | mesitylene        | 13 | 99:1 |
| 33              | Pd(OAc) <sub>2</sub>                                 | <b>L6</b>  | NaOAc                           | mesitylene        | 4  | –    |
| 34              | Pd(OAc) <sub>2</sub>                                 | <b>L6</b>  | KOAc                            | mesitylene        | 35 | 99:1 |
| 35              | Pd(OAc) <sub>2</sub>                                 | <b>L6</b>  | NaOPiv                          | mesitylene        | 10 | 99:1 |
| 36              | Pd(OAc) <sub>2</sub>                                 | <b>L6</b>  | <i>t</i> -BuOK                  | mesitylene        | 12 | 99:1 |
| 37              | Pd(OAc) <sub>2</sub>                                 | <b>L6</b>  | <i>t</i> -BuONa                 | mesitylene        | 11 | 99:1 |
| 38              | Pd(OAc) <sub>2</sub>                                 | <b>L6</b>  | CsF                             | mesitylene        | 31 | 99:1 |
| 39              | Pd(OAc) <sub>2</sub>                                 | <b>L6</b>  | KF                              | mesitylene        | 18 | 99:1 |
| 40              | Pd(OAc) <sub>2</sub>                                 | <b>L6</b>  | K <sub>2</sub> CO <sub>3</sub>  | toluene           | 54 | 99:1 |
| 41              | Pd(OAc) <sub>2</sub>                                 | <b>L6</b>  | K <sub>2</sub> CO <sub>3</sub>  | <i>o</i> -xylene  | 62 | 99:1 |
| 42              | Pd(OAc) <sub>2</sub>                                 | <b>L6</b>  | K <sub>2</sub> CO <sub>3</sub>  | <i>m</i> -xylene  | 57 | 99:1 |
| 43              | Pd(OAc) <sub>2</sub>                                 | <b>L6</b>  | K <sub>2</sub> CO <sub>3</sub>  | <i>p</i> -xylene  | 60 | 99:1 |
| 44              | Pd(OAc) <sub>2</sub>                                 | <b>L6</b>  | K <sub>2</sub> CO <sub>3</sub>  | PhCF <sub>3</sub> | 12 | 99:1 |
| 45              | Pd(OAc) <sub>2</sub>                                 | <b>L6</b>  | K <sub>2</sub> CO <sub>3</sub>  | 1,4-dioxane       | 43 | 99:1 |
| 46              | Pd(OAc) <sub>2</sub>                                 | <b>L6</b>  | K <sub>2</sub> CO <sub>3</sub>  | DCE               | 14 | 99:1 |
| 47              | Pd(OAc) <sub>2</sub>                                 | <b>L6</b>  | K <sub>2</sub> CO <sub>3</sub>  | NMP               | 2  | –    |
| 48              | Pd(OAc) <sub>2</sub>                                 | <b>L6</b>  | K <sub>2</sub> CO <sub>3</sub>  | DMSO              | 3  | –    |
| 49              | Pd(OAc) <sub>2</sub>                                 | <b>L6</b>  | K <sub>2</sub> CO <sub>3</sub>  | DMF               | 2  | –    |
| 50 <sup>d</sup> | Pd(OAc) <sub>2</sub>                                 | <b>L6</b>  | K <sub>2</sub> CO <sub>3</sub>  | <i>o</i> -xylene  | 65 | 99:1 |

|                       |                      |           |                                |                  |    |      |
|-----------------------|----------------------|-----------|--------------------------------|------------------|----|------|
| 51 <sup>e</sup>       | Pd(OAc) <sub>2</sub> | <b>L6</b> | K <sub>2</sub> CO <sub>3</sub> | <i>o</i> -xylene | 69 | 99:1 |
| 52 <sup>f</sup>       | Pd(OAc) <sub>2</sub> | <b>L6</b> | K <sub>2</sub> CO <sub>3</sub> | <i>o</i> -xylene | 69 | 99:1 |
| 53 <sup>e,g</sup>     | Pd(OAc) <sub>2</sub> | <b>L6</b> | K <sub>2</sub> CO <sub>3</sub> | <i>o</i> -xylene | 67 | 99:1 |
| 54 <sup>e,h</sup>     | Pd(OAc) <sub>2</sub> | <b>L6</b> | K <sub>2</sub> CO <sub>3</sub> | <i>o</i> -xylene | 69 | 99:1 |
| 55 <sup>e,i</sup>     | Pd(OAc) <sub>2</sub> | <b>L6</b> | K <sub>2</sub> CO <sub>3</sub> | <i>o</i> -xylene | 75 | 99:1 |
| 65 <sup>e,i,j</sup>   | Pd(OAc) <sub>2</sub> | <b>L6</b> | K <sub>2</sub> CO <sub>3</sub> | <i>o</i> -xylene | 81 | 99:1 |
| 66 <sup>e,i,k</sup>   | Pd(OAc) <sub>2</sub> | <b>L6</b> | K <sub>2</sub> CO <sub>3</sub> | <i>o</i> -xylene | 71 | 99:1 |
| 67 <sup>e,i,l</sup>   | Pd(OAc) <sub>2</sub> | <b>L6</b> | K <sub>2</sub> CO <sub>3</sub> | <i>o</i> -xylene | 70 | 99:1 |
| 68 <sup>e,i,j,m</sup> | Pd(OAc) <sub>2</sub> | <b>L6</b> | K <sub>2</sub> CO <sub>3</sub> | <i>o</i> -xylene | 62 | 99:1 |
| 69 <sup>e,i,j,n</sup> | Pd(OAc) <sub>2</sub> | <b>L6</b> | K <sub>2</sub> CO <sub>3</sub> | <i>o</i> -xylene | 76 | 99:1 |
| 70 <sup>e,i,j,o</sup> | Pd(OAc) <sub>2</sub> | <b>L6</b> | K <sub>2</sub> CO <sub>3</sub> | <i>o</i> -xylene | 69 | 99:1 |

**Phosphine ligands examined in this work:**

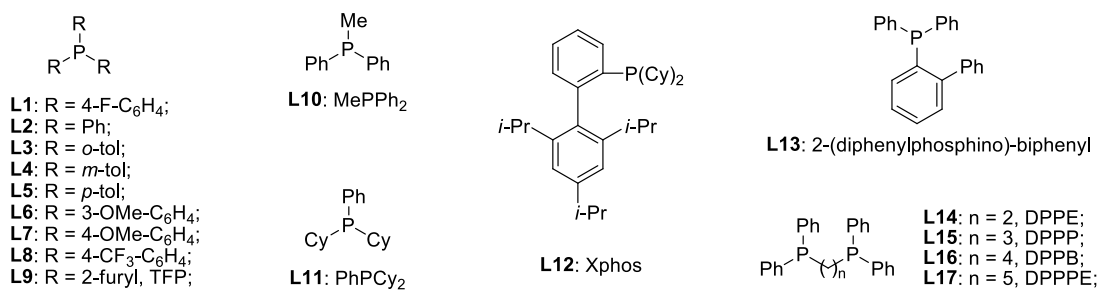

<sup>a</sup> Unless otherwise noted, all reactions were performed with **1a** (0.2 mmol, 1.0 equiv), **2a** (0.2 mmol, 1.0 equiv), **3** (0.4 mmol, 2.0 equiv), Pd-catalyst (10 mol%), ligand (20 mol%), base (0.4 mmol, 2.0 equiv) in 2.0 mL of solvent under N<sub>2</sub> atmosphere at 100 °C for 24 h. <sup>b</sup> Isolated yield based on **1a**. <sup>c</sup> The dr values were determined by <sup>1</sup>H NMR analysis. <sup>d</sup> 3.0 equiv of **3** was used. <sup>e</sup> 4.0 equiv of **3** was used. <sup>f</sup> 5.0 equiv of **3** was used. <sup>g</sup> 1.0 equiv of K<sub>2</sub>CO<sub>3</sub> was used. <sup>h</sup> 3.0 equiv of K<sub>2</sub>CO<sub>3</sub> was used. <sup>i</sup> 4.0 equiv of K<sub>2</sub>CO<sub>3</sub> was used. <sup>j</sup> 1.2 equiv of **2a** was used. <sup>k</sup> 1.4 equiv of **2a** was used. <sup>l</sup> 1.6 equiv of **2a** was used. <sup>m</sup> 4.0 mL of *o*-xylene was used. <sup>n</sup> 1.3 mL of *o*-xylene was used. <sup>o</sup> 1.0 mL of *o*-xylene was used.

### 3. Representative procedure for the synthesis of compound ( $\pm$ )-4a.

A 4 mL flame-dried vial with a stir bar was charged with 3-iodochromone (**1a**, 54.4 mg, 0.2 mmol),  $\alpha$ -bromoacetophenone (**2a**, 47.8 mg, 0.24 mmol), TCD (**3**, 128.2 mg, 0.8mmol), Pd(OAc)<sub>2</sub> (4.5 mg, 0.02 mmol), P(3-OMe-C<sub>6</sub>H<sub>4</sub>)<sub>3</sub> (14.1mg, 0.04 mmol), and K<sub>2</sub>CO<sub>3</sub> (110.6 mg, 0.8 mmol) in 2.0 mL of dry *o*-xylene under nitrogen atmosphere at 100 °C for 24 h. After the completion of the reaction detected by thin layer chromatography (TLC), the mixture was cooled to room temperature and purified by flash column chromatography on silica gel (petroleum ether/ethyl acetate = 8:1–1:1) to afford the desired product ( $\pm$ )-**4a** as a light yellow solid (68.4 mg, 81%, 99:1 dr).

### 4. Characterization data of compounds ( $\pm$ )-4a–af

Scheme 2, 4a

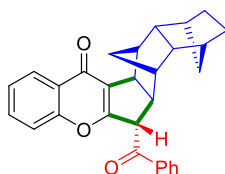

( $\pm$ )-**6-Benzoyl-6a,7,7a,8,9,10,11,11a,12,12a-decahydro-7,12:8,11-dimethanobenzo[5,6]indeno[2,1-*b*]chromen-13 (6*H*)-one (4a)**. Light yellow solid, 68.4 mg, 81% yield, mp 235.4–237.2 °C; 99:1 dr; <sup>1</sup>H NMR (400 MHz, CDCl<sub>3</sub>)  $\delta$  8.23 (d, *J* = 8.0 Hz, 1H), 8.06 (d, *J* = 8.4 Hz, 2H), 7.66 (td, *J* = 7.2, 1.6 Hz, 1H), 7.59–7.53 (m, 3H), 7.39–7.29 (m, 2H), 4.51–4.47 (m, 1H), 3.67 (d, *J* = 7.2 Hz, 1H), 2.81–2.72 (m, 2H), 2.43 (d, *J* = 4.6 Hz, 1H), 2.40 (d, *J* = 3.6 Hz, 1H), 2.06 (d, *J* = 3.6 Hz, 1H), 1.86 (dd, *J* = 10.0, 4.8 Hz, 1H), 1.77 (dd, *J* = 10.0, 4.8 Hz, 1H), 1.61 (d, *J* = 11.4 Hz, 1H), 1.51–1.41 (m, 3H), 1.24 (d, *J* = 10.8 Hz, 1H), 1.03–0.93 (m, 3H); <sup>13</sup>C NMR (100 MHz, CDCl<sub>3</sub>)  $\delta$  197.3, 176.2, 165.7, 157.1, 135.9, 134.0, 133.1, 129.0, 129.0, 125.9, 125.1, 124.9, 124.5, 118.2, 59.2, 50.2, 50.1, 47.9, 44.9, 43.8, 42.7, 36.4, 36.3, 35.3, 31.4, 31.3. HRMS (ESI-TOF): calcd. for C<sub>29</sub>H<sub>27</sub>O<sub>3</sub> [M + H]<sup>+</sup> 423.1955; found 423.1951.

Scheme 2, 4b

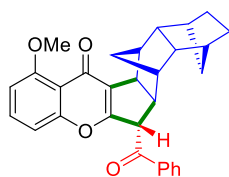

(±)-6-Benzoyl-1-methoxy-6a,7,7a,8,9,10,11,11a,12,12a-decahydro-7,12:8,11-dimethanobenzo[5,6]indeno[2,1-*b*] chromen-13(6*H*)-one (**4b**). Light yellow solid, 56.8 mg, 63% yield, mp 220.7–222.5 °C; 99:1 dr; <sup>1</sup>H NMR (400 MHz, CDCl<sub>3</sub>) δ 8.04 (d, *J* = 7.4 Hz, 2H), 7.64 (t, *J* = 7.4 Hz, 1H), 7.53 (t, *J* = 7.4 Hz, 2H), 7.43 (t, *J* = 8.4 Hz, 1H), 6.85 (d, *J* = 8.4 Hz, 1H), 6.76 (d, *J* = 8.4 Hz, 1H), 4.42 (s, 1H), 3.94 (s, 3H), 3.59 (d, *J* = 7.0 Hz, 1H), 2.80–2.69 (m, 2H), 2.40–2.34 (m, 2H), 2.03 (s, 1H), 1.85–1.80 (m, 1H), 1.76–1.73 (m, 1H), 1.60 (d, *J* = 11.2 Hz, 1H), 1.49–1.37 (m, 3H), 1.21 (d, *J* = 10.4 Hz, 1H), 1.01–0.90 (m, 3H); <sup>13</sup>C NMR (100 MHz, CDCl<sub>3</sub>) δ 197.3, 176.2, 163.2, 160.4, 159.4, 135.9, 133.9, 133.0, 129.0, 128.4, 126.0, 115.2, 110.4, 106.6, 59.0, 56.5, 50.4, 50.2, 50.1, 47.8, 45.0, 43.7, 42.8, 41.0, 36.3, 36.2, 35.3, 31.4. HRMS (ESI-TOF): calcd. for C<sub>30</sub>H<sub>29</sub>O<sub>4</sub> [M + H]<sup>+</sup> 453.2060; found 453.2067.

Scheme 2, 4c

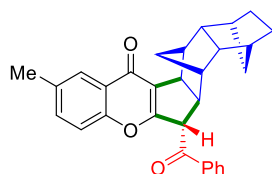

(±)-6-Benzoyl-2-methyl-6a,7,7a,8,9,10,11,11a,12,12a-decahydro-7,12:8,11-dimethanobenzo[5,6]indeno[2,1-*b*] chromen-13(6*H*)-one (**4c**). Light yellow solid, 61.1 mg, 70% yield, mp 126.5–128.2 °C; 99:1 dr; <sup>1</sup>H NMR (400 MHz, CDCl<sub>3</sub>) δ 8.05 (d, *J* = 7.6 Hz, 2H), 7.99 (s, 1H), 7.64 (t, *J* = 7.4 Hz, 1H), 7.54 (t, *J* = 7.6 Hz, 2H), 7.36 (dd, *J* = 8.4, 2.4 Hz, 1H), 7.20 (d, *J* = 8.4 Hz, 1H), 4.47 (s, 1H), 3.65 (d, *J* = 7.2 Hz, 1H), 2.78–2.70 (m, 2H), 2.41–2.38 (m, 5H), 2.04 (s, 1H), 1.85 (dd, *J* = 10.0, 4.8 Hz, 1H), 1.75 (dd, *J* = 10.0, 4.8 Hz, 1H), 1.61 (d, *J* = 11.2 Hz, 1H), 1.50–1.38 (m, 3H), 1.21 (d, *J* = 10.4 Hz, 1H), 1.03–0.91 (m, 3H); <sup>13</sup>C NMR (100 MHz, CDCl<sub>3</sub>) δ 197.3, 176.2, 165.6, 155.4, 135.8, 134.9, 134.2, 133.9, 129.0, 128.9, 125.2, 124.6, 124.1, 117.9, 59.1, 50.1, 50.1, 47.8, 44.8, 43.8, 42.7, 36.3, 36.2, 35.3, 31.4, 31.3, 21.0. HRMS (ESI-TOF): calcd. for C<sub>30</sub>H<sub>29</sub>O<sub>3</sub> [M + H]<sup>+</sup> 437.2111; found 437.2113.

Scheme 2, 4d

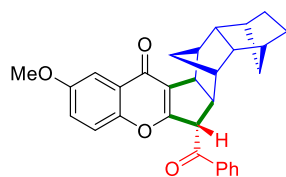

**(±)-6-Benzoyl-2-methoxy-6a,7,7a,8,9,10,11,11a,12,12a-decahydro-7,12:8,11-dimethanobenzo[5,6]indeno[2,1-*b*] chromen-13(6*H*)-one (4d).** Light yellow solid, 66.1 mg, 73% yield, mp 121.7–123.4 °C; 99:1 dr; <sup>1</sup>H NMR (400 MHz, CDCl<sub>3</sub>) δ 8.08–8.02 (m, 2H), 7.67–7.61 (m, 1H), 7.60–7.52 (m, 3H), 7.26–7.22 (m, 1H), 7.17–7.14 (m, 1H), 4.48 (dd, *J* = 3.6, 2.0 Hz, 1H), 3.90–3.86 (m, 3H), 3.66 (d, *J* = 5.6 Hz, 1H), 2.80–2.71 (m, 2H), 2.41 (t, *J* = 5.6 Hz, 2H), 2.05 (s, 1H), 1.88–1.83 (m, 1H), 1.78–1.74 (m, 1H), 1.61 (d, *J* = 11.2 Hz, 1H), 1.51–1.38 (m, 3H), 1.26–1.19 (m, 1H), 1.03–0.93 (m, 3H); <sup>13</sup>C NMR (100 MHz, CDCl<sub>3</sub>) δ 197.3, 176.0, 165.6, 156.9, 151.9, 135.9, 133.9, 129.1, 129.0, 125.1, 124.2, 122.9, 119.5, 105.2, 59.1, 56.0, 50.2, 50.1, 47.9, 44.8, 43.8, 42.8, 36.4, 36.3, 35.3, 31.4, 31.3. HRMS (ESI-TOF): calcd. for C<sub>30</sub>H<sub>29</sub>O<sub>4</sub> [M + H]<sup>+</sup> 453.2060; found 453.2058.

Scheme 2, 4e

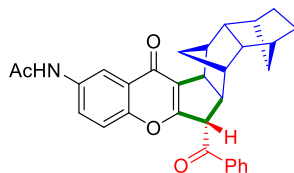

**(±)-6-Benzoyl-13-oxo-6,6a,7,7a,8,9,10,11,11a,12,12a,13-dodecahydro-7,12:8,11-dimethanobenzo[5,6]indeno[2,1-*b*] chromen-2-yl)acetamide (4e).** Light yellow solid, 29.7 mg, 31% yield, mp 207.8–209.4 °C; 99:1 dr; <sup>1</sup>H NMR (400 MHz, CDCl<sub>3</sub>) δ 8.97 (br s, 1H), 8.50 (d, *J* = 9.0 Hz, 1H), 8.06 (d, *J* = 7.6 Hz, 2H), 8.01 (s, 1H), 7.68 (t, *J* = 7.4 Hz, 1H), 7.57 (t, *J* = 7.6 Hz, 2H), 7.34 (d, *J* = 9.0 Hz, 1H), 4.52 (s, 1H), 3.65 (d, *J* = 7.2 Hz, 1H), 2.79 (dd, *J* = 7.6, 3.4 Hz, 1H), 2.71 (d, *J* = 4.4 Hz, 1H), 2.44 (d, *J* = 4.4 Hz, 1H), 2.36 (s, 3H), 2.30 (s, 1H), 2.07 (d, *J* = 3.4 Hz, 1H), 1.88–1.84 (m, 1H), 1.79 (dd, *J* = 10.0, 4.8 Hz, 1H), 1.60 (d, *J* = 10.8 Hz, 1H), 1.50–1.42 (m, 2H), 1.25 (d, *J* = 10.0 Hz, 1H), 1.04–0.94 (m, 3H), 0.91–0.80 (m, 1H); <sup>13</sup>C NMR (100 MHz, CDCl<sub>3</sub>) δ 197.2, 176.4, 169.6, 166.7, 153.5, 136.5, 135.8, 134.1, 129.1, 129.0, 126.5, 124.3, 124.2, 118.9, 114.8, 59.0, 50.1, 50.0, 47.8, 44.9, 43.8, 42.7, 36.4, 36.3, 35.3, 31.3, 24.9. HRMS (ESI-TOF): calcd. for C<sub>31</sub>H<sub>30</sub>NO<sub>4</sub> [M + H]<sup>+</sup> 480.2169; found 480.2163.

Scheme 2, 4f

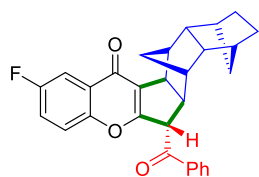

(±)-6-Benzoyl-2-fluoro-6a,7,7a,8,9,10,11,11a,12,12a-decahydro-7,12:8,11-dimethanobenzo[5,6]indeno[2,1-*b*] chromen-13(6*H*)-one (**4f**). Light yellow solid, 44.1 mg, 50% yield, mp 254.3–256.1 °C; 99:1 dr; <sup>1</sup>H NMR (400 MHz, CDCl<sub>3</sub>) δ 8.05 (d, *J* = 7.6 Hz, 2H), 7.85 (dd, *J* = 8.4, 2.6 Hz, 1H), 7.66 (t, *J* = 7.4 Hz, 1H), 7.56 (t, *J* = 7.6 Hz, 2H), 7.36–7.27 (m, 2H), 4.49 (s, 1H), 3.65 (d, *J* = 7.2 Hz, 1H), 2.77 (dd, *J* = 7.4, 3.4 Hz, 1H), 2.72 (d, *J* = 4.6 Hz, 1H), 2.44 (d, *J* = 4.6 Hz, 1H), 2.39 (s, 1H), 2.05 (s, 1H), 1.86 (dd, *J* = 10.0, 4.6 Hz, 1H), 1.78 (dd, *J* = 10.0, 4.6 Hz, 1H), 1.59 (d, *J* = 11.2 Hz, 1H), 1.47–1.40 (m, 2H), 1.29–1.21 (m, 2H), 1.04–0.93 (m, 3H); <sup>13</sup>C NMR (100 MHz, CDCl<sub>3</sub>) δ 197.1, 175.3, 166.2, 159.6 (d, *J* = 246.2 Hz, 1C), 153.3 (d, *J* = 1.8 Hz, 1C), 135.8, 134.1, 129.0 (d, *J* = 9.7 Hz, 1C), 125.8 (d, *J* = 7.0 Hz, 1C), 124.5, 121.1 (d, *J* = 25.5 Hz, 1C), 120.20 (d, *J* = 8.0 Hz, 1C), 110.8 (d, *J* = 23.7 Hz, 1C), 59.1, 50.2, 50.1, 47.8, 44.8, 43.8, 42.8, 36.3, 36.2, 35.3, 31.4, 31.3. HRMS (ESI-TOF): calcd. for C<sub>29</sub>H<sub>26</sub>FO<sub>3</sub> [M + H]<sup>+</sup> 441.1860; found 441.1851.

Scheme 2, 4g

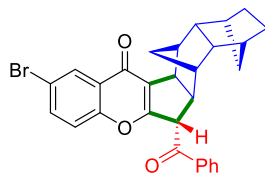

(±)-6-Benzoyl-2-bromo-6a,7,7a,8,9,10,11,11a,12,12a-decahydro-7,12:8,11-dimethanobenzo[5,6]indeno[2,1-*b*] chromen-13(6*H*)-one (**4g**). Light yellow solid, 78.2 mg, 78% yield, mp 229.8–231.5 °C; 99:1 dr; <sup>1</sup>H NMR (400 MHz, CDCl<sub>3</sub>) δ 8.34 (s, 1H), 8.04 (d, *J* = 6.8 Hz, 2H), 7.70–7.62 (m, 2H), 7.56 (t, *J* = 6.4 Hz, 2H), 7.21 (dd, *J* = 8.8, 2.4 Hz, 1H), 4.48 (s, 1H), 3.65 (d, *J* = 7.0 Hz, 1H), 2.81–2.67 (m, 2H), 2.44 (s, 1H), 2.39 (s, 1H), 2.05 (s, 1H), 1.90–1.83 (m, 1H), 1.80–1.74 (m, 1H), 1.58 (d, *J* = 11.0 Hz, 1H), 1.51–1.37 (m, 3H), 1.26–1.23 (m, 1H), 1.05–0.91 (m, 3H); <sup>13</sup>C NMR (100 MHz, CDCl<sub>3</sub>) δ 197.1, 174.8, 166.1, 155.9, 136.0, 135.7, 134.1, 129.1, 129.0, 128.6, 125.9, 125.2, 120.2, 118.5, 59.1, 50.2, 50.1, 47.9, 44.9, 43.8, 42.8, 36.3, 36.2, 35.3, 31.4, 31.3. HRMS (ESI-TOF): calcd. for C<sub>29</sub>H<sub>26</sub>BrO<sub>3</sub> [M + H]<sup>+</sup> 501.1060; found 501.1051.



Scheme 2, 4h

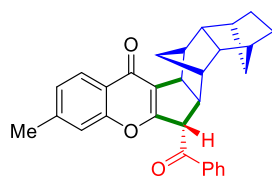

(±)-6-Benzoyl-3-methyl-6a,7,7a,8,9,10,11,11a,12,12a-decahydro-7,12:8,11-dimethanobenzo[5,6]indeno[2,1-*b*] chromen-13(6*H*)-one (**4h**). Light yellow solid, 61.1 mg, 70% yield, mp 192.4–194.2 °C; 99:1 dr; <sup>1</sup>H NMR (400 MHz, CDCl<sub>3</sub>) δ 8.13–8.08 (m, 1H), 8.08–8.03 (m, 2H), 7.69–7.62 (m, 1H), 7.59–7.51 (m, 2H), 7.20–7.14 (m, 1H), 7.10 (s, 1H), 4.47–4.45 (m, 1H), 3.65 (d, *J* = 7.0 Hz, 1H), 2.78–2.74 (m, 2H), 2.43–2.39 (m, 5H), 2.08–2.03 (m, 1H), 1.86 (dd, *J* = 10.0, 4.6 Hz, 1H), 1.77 (dd, *J* = 10.0, 4.6 Hz, 1H), 1.61 (d, *J* = 11.0 Hz, 1H), 1.49–1.42 (m, 3H), 1.23 (d, *J* = 9.8 Hz, 1H), 1.04–0.92 (m, 3H); <sup>13</sup>C NMR (100 MHz, CDCl<sub>3</sub>) δ 197.3, 176.2, 165.4, 157.3, 144.3, 135.9, 133.9, 129.1, 129.0, 126.5, 125.7, 124.7, 122.2, 118.0, 59.2, 50.2, 50.1, 47.9, 44.9, 43.9, 42.7, 36.4, 36.3, 35.3, 31.4, 31.4, 21.8. HRMS (ESI-TOF): calcd. for C<sub>30</sub>H<sub>29</sub>O<sub>3</sub> [M + H]<sup>+</sup> 437.2111; found 437.2113.

Scheme 2, 4i

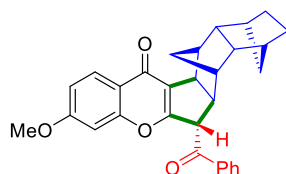

(±)-6-Benzoyl-3-methoxy-6a,7,7a,8,9,10,11,11a,12,12a-decahydro-7,12:8,11-dimethanobenzo[5,6]indeno[2,1-*b*] chromen-13(6*H*)-one (**4i**). Light yellow solid, 72.4 mg, 80% yield, mp 164.9–166.7 °C; 99:1 dr; <sup>1</sup>H NMR (400 MHz, CDCl<sub>3</sub>) δ 8.10 (d, *J* = 8.8 Hz, 1H), 8.04 (d, *J* = 7.6 Hz, 2H), 7.64 (t, *J* = 7.4 Hz, 1H), 7.53 (t, *J* = 7.6 Hz, 2H), 6.91 (dd, *J* = 8.8, 2.4 Hz, 1H), 6.70 (d, *J* = 2.4 Hz, 1H), 4.45 (dd, *J* = 3.6, 2.0 Hz, 1H), 3.80 (s, 3H), 3.62 (d, *J* = 6.8 Hz, 1H), 2.73 (t, *J* = 5.2 Hz, 2H), 2.41 (d, *J* = 4.6 Hz, 1H), 2.37 (d, *J* = 3.8 Hz, 1H), 2.03 (d, *J* = 3.8 Hz, 1H), 1.84 (dd, *J* = 10.0, 4.8 Hz, 1H), 1.75 (dd, *J* = 10.0, 4.8 Hz, 1H), 1.58 (d, *J* = 11.2 Hz, 1H), 1.49–1.41 (m, 3H), 1.24–1.19 (m, 1H), 1.03–0.91 (m, 3H); <sup>13</sup>C NMR (100 MHz, CDCl<sub>3</sub>) δ 197.4, 175.7, 165.1, 163.6, 158.8, 135.8, 133.9, 129.0, 128.9, 127.1, 124.7, 118.3, 114.1, 100.6, 59.1, 55.8, 50.1, 50.1, 47.8, 44.7, 43.8, 42.8, 36.3, 36.2,

35.3, 31.3, 31.2. HRMS (ESI-TOF): calcd. for C<sub>30</sub>H<sub>29</sub>O<sub>4</sub> [M + H]<sup>+</sup> 453.2060; found 453.2057.

Scheme 2, 4j

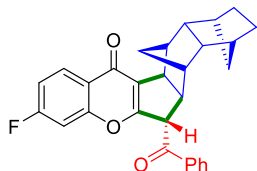

**(±)-6-Benzoyl-3-fluoro-6a,7,7a,8,9,10,11,11a,12,12a-decahydro-7,12:8,11-dimethanobenzo[5,6]indeno[2,1-*b*] chromen-13(6*H*)-one (4j).** Light yellow solid, 66.1 mg, 75% yield, mp 213.6–215.0 °C; 99:1 dr; <sup>1</sup>H NMR (400 MHz, CDCl<sub>3</sub>) δ 8.22 (dd, *J* = 8.8, 6.4 Hz, 1H), 8.04 (d, *J* = 7.6 Hz, 2H), 7.66 (t, *J* = 7.4 Hz, 1H), 7.55 (t, *J* = 7.6 Hz, 2H), 7.09 (td, *J* = 8.4, 2.4 Hz, 1H), 7.00 (dd, *J* = 9.2, 2.4 Hz, 1H), 4.48 (s, 1H), 3.63 (d, *J* = 7.1 Hz, 1H), 2.79–2.69 (m, 2H), 2.44 (d, *J* = 4.6 Hz, 1H), 2.38 (s, 1H), 2.04 (s, 1H), 1.86 (dd, *J* = 10.0, 4.6 Hz, 1H), 1.77 (dd, *J* = 10.0, 4.6 Hz, 1H), 1.58 (d, *J* = 11.2 Hz, 1H), 1.51–1.41 (m, 3H), 1.24 (d, *J* = 10.2 Hz, 1H), 1.03–0.92 (m, 3H); <sup>13</sup>C NMR (100 MHz, CDCl<sub>3</sub>) δ 197.1, 175.3, 165.9, 165.3 (d, *J* = 254.1 Hz, 1C), 158.0 (d, *J* = 13.2 Hz, 1C), 135.7, 134.1, 130.6, 129.0 (d, *J* = 10.4 Hz, C), 128.3 (d, *J* = 10.6 Hz, 1C), 125.1, 121.3 (d, *J* = 2.3 Hz, 1C), 113.7 (d, *J* = 22.7 Hz, 1C), 104.9 (d, *J* = 25.4 Hz, 1C), 59.0, 50.2, 50.1, 47.8, 44.8, 43.8, 42.9, 36.3, 36.3, 35.3, 31.4, 31.3. HRMS (ESI-TOF): calcd. for C<sub>29</sub>H<sub>26</sub>FO<sub>3</sub> [M + H]<sup>+</sup> 441.1860; found 441.1852.

Scheme 2, 4k

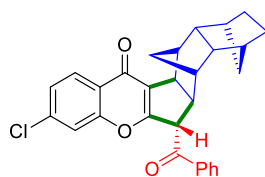

**(±)-6-Benzoyl-3-chloro-6a,7,7a,8,9,10,11,11a,12,12a-decahydro-7,12:8,11-dimethanobenzo[5,6]indeno[2,1-*b*] chromen-13(6*H*)-one (4k).** Light yellow solid, 74.0 mg, 81% yield, mp 197.9–199.9 °C; 99:1 dr; <sup>1</sup>H NMR (400 MHz, CDCl<sub>3</sub>) δ 8.15 (dt, *J* = 9.2, 1.6 Hz, 1H), 8.05 (d, *J* = 7.2 Hz, 2H), 7.69–7.63 (m, 1H), 7.59–7.52 (m, 2H), 7.36–7.30 (m, 2H), 4.48 (dd, *J* = 3.6, 2.0 Hz, 1H), 3.64 (d, *J* = 7.2 Hz, 1H), 2.79–2.74 (m, 1H), 2.72 (d, *J* = 4.4 Hz, 1H), 2.44 (d, *J* = 4.6 Hz, 1H), 2.38 (s, 1H), 2.05 (s, 1H), 1.86 (dd, *J* = 10.2, 4.4 Hz, 1H), 1.77 (dd, *J* = 10.2, 4.4 Hz, 1H), 1.59 (d, *J* = 11.2 Hz, 1H), 1.50–1.39 (m, 3H), 1.25 (d, *J* =

10.2 Hz, 1H), 1.04–0.92 (m, 3H);  $^{13}\text{C}$  NMR (100 MHz,  $\text{CDCl}_3$ )  $\delta$  197.0, 175.3, 165.9, 157.2, 139.1, 135.7, 134.1, 129.1, 129.0, 127.2, 125.9, 125.3, 123.0, 118.3, 59.0, 50.1, 50.0, 47.8, 44.8, 43.8, 42.8, 36.3, 36.2, 35.3, 31.4, 31.3. HRMS (ESI-TOF): calcd. for  $\text{C}_{29}\text{H}_{26}\text{ClO}_3$   $[\text{M} + \text{H}]^+$  457.1565; found 457.1557.

Scheme 2, 4l

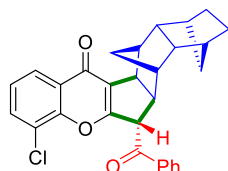

**(±)-6-Benzoyl-4-chloro-6a,7,7a,8,9,10,11,11a,12,12a-decahydro-7,12:8,11-dimethanobenzo[5,6]indeno[2,1-*b*] chromen-13(6*H*)-one (4l).** Light yellow solid, 56.7 mg, 62% yield, mp 249.3–251.0 °C; 99:1 dr;  $^1\text{H}$  NMR (400 MHz,  $\text{CDCl}_3$ )  $\delta$  8.15–8.03 (m, 3H), 7.68–7.58 (m, 2H), 7.54 (t,  $J = 7.6$  Hz, 2H), 7.30–7.24 (m, 1H), 4.57 (s, 1H), 3.64 (d,  $J = 7.2$  Hz, 1H), 2.93–2.85 (m, 1H), 2.70 (d,  $J = 4.6$  Hz, 1H), 2.38 (s, 2H), 2.07 (s, 1H), 1.85 (dd,  $J = 10.0, 4.6$  Hz, 1H), 1.76 (dd,  $J = 10.0, 4.6$  Hz, 1H), 1.65 (d,  $J = 11.2$  Hz, 1H), 1.49–1.40 (m, 3H), 1.23 (d,  $J = 10.4$  Hz, 1H), 1.03–0.95 (m, 3H);  $^{13}\text{C}$  NMR (100 MHz,  $\text{CDCl}_3$ )  $\delta$  196.8, 175.5, 165.6, 152.8, 135.9, 134.0, 133.5, 129.2, 129.0, 125.9, 125.1, 125.1, 124.6, 123.3, 59.0, 50.2, 50.1, 47.8, 44.7, 43.8, 42.2, 36.4, 36.3, 35.3, 31.4. HRMS (ESI-TOF): calcd. for  $\text{C}_{29}\text{H}_{26}\text{ClO}_3$   $[\text{M} + \text{H}]^+$  457.1565; found 457.1563.

Scheme 2, 4m

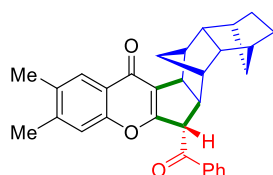

**(±)-6-Benzoyl-2,3-dimethyl-6a,7,7a,8,9,10,11,11a,12,12a-decahydro-7,12:8,11-dimethanobenzo[5,6]indeno[2,1-*b*] chromen-13(6*H*)-one (4m).** White solid, 63.1 mg, 70% yield, mp 161.3–162.9 °C; 99:1 dr;  $^1\text{H}$  NMR (400 MHz,  $\text{CDCl}_3$ )  $\delta$  8.03 (d,  $J = 7.6$  Hz, 2H), 7.91 (s, 1H), 7.63 (t,  $J = 7.4$  Hz, 1H), 7.53 (t,  $J = 7.6$  Hz, 2H), 7.06 (s, 1H), 4.44 (s, 1H), 3.63 (d,  $J = 7.2$  Hz, 1H), 2.77–2.69 (m, 2H), 2.38 (s, 2H), 2.30 (s, 3H), 2.29 (s, 3H), 2.03 (t,  $J = 4.8$  Hz, 1H), 1.83 (dd,  $J = 10.0, 4.8$  Hz, 1H), 1.74 (dd,  $J = 10.0, 4.8$  Hz, 1H), 1.60 (d,  $J = 11.2$  Hz, 1H), 1.47–1.38 (m, 3H), 1.20 (d,  $J = 10.4$  Hz, 1H), 1.00–0.89 (m, 3H);  $^{13}\text{C}$  NMR (100 MHz,  $\text{CDCl}_3$ )  $\delta$  197.4, 176.3, 165.3, 155.7, 143.4, 136.0, 134.2, 133.9, 129.0,

125.5, 124.6, 122.3, 118.3, 59.3, 50.2, 50.1, 47.9, 44.9, 43.9, 42.7, 36.4, 36.3, 35.3, 31.4, 31.3, 20.4, 19.4. HRMS (ESI-TOF): calcd. for C<sub>31</sub>H<sub>31</sub>O<sub>3</sub> [M + H]<sup>+</sup> 451.2268; found 451.2279.

Scheme 2, 4n

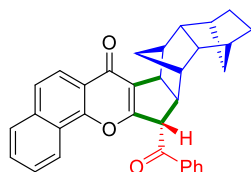

(±)-14-Benzoyl-8,8a,9,10,11,12,12a,13,13a,14-decahydro-8,13:9,12-dimethanobenzo[h]benzo[5,6]indeno[2,1-b] chromen-7(7bH)-one (4n). Light yellow solid, 39.7 mg, 42% yield, mp 144.2–146.0 °C; 99:1 dr; <sup>1</sup>H NMR (400 MHz, CDCl<sub>3</sub>) δ 8.17–8.12 (m, 3H), 8.04 (d, *J* = 8.0 Hz, 1H), 7.85 (d, *J* = 8.0 Hz, 1H), 7.73–7.68 (m, 2H), 7.62–7.59 (m, 3H), 7.50–7.45 (m, 1H), 4.66 (s, 1H), 3.74–3.70 (m, 1H), 3.02–2.93 (m, 1H), 2.80 (s, 1H), 2.43 (s, 2H), 2.11 (s, 1H), 1.88 (dd, *J* = 10.0, 4.8 Hz, 1H), 1.79 (dt, *J* = 9.8, 4.6 Hz, 1H), 1.69 (d, *J* = 11.2 Hz, 1H), 1.51–1.45 (m, 3H), 1.25 (d, *J* = 10.4 Hz, 1H), 1.06–0.96 (m, 3H); <sup>13</sup>C NMR (100 MHz, CDCl<sub>3</sub>) δ 197.0, 176.1, 164.6, 154.4, 136.1, 135.7, 134.0, 129.1, 129.0, 128.9, 128.0, 126.9, 126.0, 125.1, 124.1, 122.2, 121.0, 120.6, 59.1, 50.2, 50.2, 47.9, 44.8, 43.8, 42.2, 36.4, 35.3, 31.4. HRMS (ESI-TOF): calcd. for C<sub>33</sub>H<sub>29</sub>O<sub>3</sub> [M + H]<sup>+</sup> 473.2111; found 473.2102.

Scheme 2, 4o

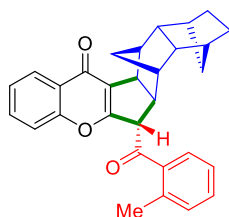

(±)-6-(2-Methylbenzoyl)-6a,7,7a,8,9,10,11,11a,12,12a-decahydro-7,12:8,11-dimethanobenzo[5,6]indeno[2,1-b] chromen-13(6H)-one (4o). Light yellow solid, 64.3 mg, 74% yield, mp 179.3–180.8 °C; 99:1 dr; <sup>1</sup>H NMR (400 MHz, CDCl<sub>3</sub>) δ 8.22 (dd, *J* = 8.0, 1.6 Hz, 1H), 7.76 (d, *J* = 7.6 Hz, 1H), 7.61–7.55 (m, 1H), 7.46 (t, *J* = 7.4 Hz, 1H), 7.40–7.30 (m, 4H), 4.39 (dd, *J* = 3.8, 2.0 Hz, 1H), 3.64 (d, *J* = 7.2 Hz, 1H), 2.77 (dd, *J* = 7.2, 3.4 Hz, 1H), 2.72 (d, *J* = 4.6 Hz, 1H), 2.52 (s, 3H), 2.40 (s, 1H), 2.31 (d, *J* = 4.6 Hz, 1H), 2.06 (s, 1H), 1.85 (dd, *J* = 10.0, 4.8 Hz, 1H), 1.74 (dd, *J* = 10.0, 4.8 Hz, 1H), 1.64 (d, *J* = 11.2 Hz, 1H),

1.56–1.41 (m, 2H), 1.37 (dd,  $J = 10.4, 1.6$  Hz, 1H), 1.20 (d,  $J = 10.4$  Hz, 1H), 1.05–0.95 (m, 3H);  $^{13}\text{C}$  NMR (100 MHz,  $\text{CDCl}_3$ )  $\delta$  200.9, 176.2, 165.8, 157.1, 139.5, 136.7, 133.1, 132.4, 132.1, 128.8, 125.9, 125.1, 124.9, 124.5, 118.2, 61.7, 50.2, 50.1, 47.8, 44.7, 43.8, 42.6, 36.4, 36.3, 36.2, 35.3, 31.4, 31.3, 21.6; HRMS (ESI-TOF): calcd. for  $\text{C}_{30}\text{H}_{29}\text{O}_3$   $[\text{M} + \text{H}]^+$  437.2111; found 437.2118.

Scheme 2, 4p

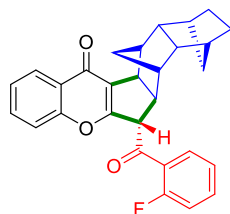

(±)-6-(2-Fluorobenzoyl)-6a,7,7a,8,9,10,11,11a,12,12a-decahydro-7,12:8,11-dimethanobenzo[5,6]indeno[2,1-*b*] chromen-13(6*H*)-one (**4p**). Light yellow solid, 37.8 mg, 43% yield, mp 207.9–209.6 °C; 99:1 dr;  $^1\text{H}$  NMR (400 MHz,  $\text{CDCl}_3$ )  $\delta$  8.19 (d,  $J = 8.0$  Hz, 1H), 7.84 (td,  $J = 7.6, 1.8$  Hz, 1H), 7.62–7.53 (m, 2H), 7.34 (t,  $J = 7.6$  Hz, 1H), 7.31–7.18 (m, 3H), 4.49 (s, 1H), 3.60 (d,  $J = 7.2$  Hz, 1H), 2.77 (dd,  $J = 7.2, 3.4$  Hz, 1H), 2.68 (d,  $J = 4.6$  Hz, 1H), 2.37 (s, 2H), 2.05 (s, 1H), 1.82 (dd,  $J = 10.0, 4.8$  Hz, 1H), 1.72 (dd,  $J = 10.0, 4.8$  Hz, 1H), 1.61 (d,  $J = 11.2$  Hz, 1H), 1.45 (td,  $J = 7.6, 4.2$  Hz, 2H), 1.34 (d,  $J = 10.4$  Hz, 1H), 1.17 (d,  $J = 10.4$  Hz, 1H), 10.02–0.93 (m, 3H);  $^{13}\text{C}$  NMR (100 MHz,  $\text{CDCl}_3$ )  $\delta$  196.2 (d,  $J = 4.1$  Hz, 1C), 176.3, 165.5, 161.8 (d,  $J = 254.9$  Hz, 1C), 157.1, 135.4 (d,  $J = 9.1$  Hz, 1C), 133.1, 131.4 (d,  $J = 2.4$  Hz, 1C), 125.9, 125.2 (d,  $J = 12.4$  Hz, 1C), 125.0, 124.9 (d,  $J = 3.4$  Hz, 1C), 124.8, 124.5, 118.2, 116.9 (d,  $J = 23.6$  Hz, 1C), 62.6 (d,  $J = 6.8$  Hz, 1C), 50.2, 50.1, 47.7 (d,  $J = 2.5$  Hz, 1C), 44.8, 43.6, 42.4, 36.4 (d,  $J = 1.6$  Hz, 1C), 36.2, 35.3, 31.4, 31.3. HRMS (ESI-TOF): calcd. for  $\text{C}_{29}\text{H}_{26}\text{FO}_3$   $[\text{M} + \text{H}]^+$  441.1860; found 441.1864.

Scheme 2, 4q

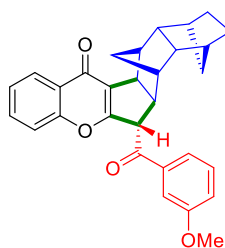

(±)-6-(3-Methoxybenzoyl)-6a,7,7a,8,9,10,11,11a,12,12a-decahydro-7,12:8,11-dimethanobenzo[5,6]indeno[2,1-*b*] chromen-13(6*H*)-one (**4q**). White solid, 49.8 mg, 55%

yield, mp 218.3–219.3 °C; 99:1 dr; <sup>1</sup>H NMR (400 MHz, CDCl<sub>3</sub>) δ 8.23 (dd, *J* = 8.0, 1.6 Hz, 1H), 7.63 (d, *J* = 7.6 Hz, 1H), 7.56 (d, *J* = 6.4 Hz, 2H), 7.46 (t, *J* = 8.0 Hz, 1H), 7.38–7.31 (m, 2H), 7.20 (dd, *J* = 8.2, 2.4 Hz, 1H), 4.46 (s, 1H), 3.88 (s, 3H), 3.66 (d, *J* = 7.2 Hz, 1H), 2.75 (t, *J* = 5.2 Hz, 2H), 2.44–2.37 (m, 2H), 2.06 (s, 1H), 1.86 (dd, *J* = 10.0, 4.8 Hz, 1H), 1.77 (dd, *J* = 10.0, 4.8 Hz, 1H), 1.61 (d, *J* = 11.2 Hz, 1H), 1.45 (dd, *J* = 18.4, 7.0 Hz, 3H), 1.23 (d, *J* = 10.4 Hz, 1H), 1.03–0.93 (m, 3H); <sup>13</sup>C NMR (100 MHz, CDCl<sub>3</sub>) δ 197.1, 176.2, 165.7, 160.2, 157.1, 137.2, 133.1, 130.0, 125.9, 125.0, 124.9, 124.5, 121.5, 120.5, 118.2, 113.2, 59.3, 55.6, 50.2, 50.1, 47.9, 44.9, 43.8, 42.9, 36.4, 36.3, 35.3, 31.4, 31.3. HRMS (ESI-TOF): calcd. for C<sub>30</sub>H<sub>29</sub>O<sub>4</sub> [M + H]<sup>+</sup> 453.2060; found 453.2051.

Scheme 2, 4r

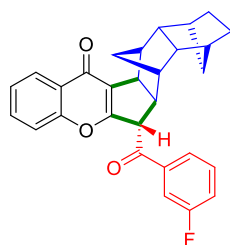

(±)-6-(3-Fluorobenzoyl)-6a,7,7a,8,9,10,11,11a,12,12a-decahydro-7,12:8,11-dimethanobenzo[5,6]indeno[2,1-*b*] chromen-13(6*H*)-one (4r). Yellow solid, 41.2 mg, 47% yield, mp 241.2–243.1 °C; 99:1 dr; <sup>1</sup>H NMR (400 MHz, CDCl<sub>3</sub>) δ 8.22 (d, *J* = 8.0 Hz, 1H), 7.84 (d, *J* = 7.8 Hz, 1H), 7.74 (d, *J* = 9.2 Hz, 1H), 7.60–7.51 (m, 2H), 7.38–7.30 (m, 3H), 4.44 (t, *J* = 2.8 Hz, 1H), 3.66 (d, *J* = 7.2 Hz, 1H), 2.78–2.71 (m, 2H), 2.42–2.39 (m, 2H), 2.06 (s, 1H), 1.88–1.84 (m, 1H), 1.77 (dd, *J* = 10.0, 4.8 Hz, 1H), 1.60 (d, *J* = 11.0 Hz, 1H), 1.50–1.41 (m, 3H), 1.24 (d, *J* = 10.2 Hz, 1H), 1.04–0.94 (m, 3H); <sup>13</sup>C NMR (100 MHz, CDCl<sub>3</sub>) δ 196.0, 176.2, 165.2, 163.1 (d, *J* = 248.7 Hz, 1C), 157.1, 138.0 (d, *J* = 6.1 Hz, 1C), 133.2, 130.7 (d, *J* = 7.6 Hz, 1C), 126.0, 125.1, 125.0, 124.7 (d, *J* = 3.1 Hz, 1C), 124.5, 121.0 (d, *J* = 21.4 Hz, 1C), 118.2, 115.8 (d, *J* = 22.4 Hz, 1C), 59.3, 50.1 (d, *J* = 7.4 Hz, 1C), 47.9, 44.9, 43.8, 42.7, 36.4, 36.3, 35.3, 31.6, 31.4 (d, *J* = 3.2 Hz, 1C), 30.3, 29.8. HRMS (ESI-TOF): calcd. for C<sub>29</sub>H<sub>26</sub>FO<sub>3</sub> [M + H]<sup>+</sup> 441.1860; found 441.1869.

Scheme 2, 4s

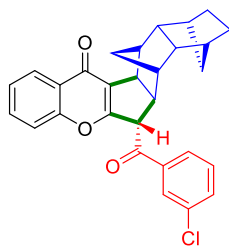

**(±)-6-(3-Chlorobenzoyl)-6a,7,7a,8,9,10,11,11a,12,12a-decahydro-7,12:8,11-dimethanobenzo[5,6]indeno[2,1-*b*] chromen-13(6*H*)-one (4s).** Light yellow solid, 39.9 mg, 44% yield, mp 179.8–181.5 °C; 99:1 dr; <sup>1</sup>H NMR (400 MHz, CDCl<sub>3</sub>) δ 8.23 (dd, *J* = 8.0, 1.6 Hz, 1H), 8.04 (s, 1H), 7.92 (d, *J* = 7.8 Hz, 1H), 7.65–7.56 (m, 2H), 7.50 (t, *J* = 8.0 Hz, 1H), 7.37 (t, *J* = 7.6 Hz, 1H), 7.31 (d, *J* = 8.4 Hz, 1H), 4.44 (dd, *J* = 3.6, 2.0 Hz, 1H), 3.66 (d, *J* = 7.2 Hz, 1H), 2.79–2.71 (m, 2H), 2.40 (s, 2H), 2.07 (s, 1H), 1.87 (dd, *J* = 10.0, 4.8 Hz, 1H), 1.78 (dd, *J* = 10.0, 4.8 Hz, 1H), 1.60 (d, *J* = 11.2 Hz, 1H), 1.52–1.40 (m, 3H), 1.25 (d, *J* = 10.4 Hz, 1H), 1.05–0.94 (m, 3H); <sup>13</sup>C NMR (100 MHz, CDCl<sub>3</sub>) δ 196.0, 176.2, 165.1, 157.1, 137.5, 135.5, 133.9, 133.2, 130.3, 129.1, 127.0, 126.0, 125.2, 125.0, 124.4, 118.2, 59.2, 50.2, 50.1, 47.8, 44.9, 43.8, 42.6, 42.4, 36.4, 36.3, 35.3, 31.4, 31.3. HRMS (ESI-TOF): calcd. for C<sub>29</sub>H<sub>26</sub>ClO<sub>3</sub> [M + H]<sup>+</sup> 457.1565; found 457.1562.

Scheme 2, 4t

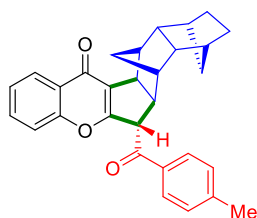

**(±)-6-(4-Methylbenzoyl)-6a,7,7a,8,9,10,11,11a,12,12a-decahydro-7,12:8,11-dimethanobenzo[5,6]indeno[2,1-*b*] chromen-13(6*H*)-one (4t).** Light yellow solid, 66.4 mg, 76% yield, mp 190.3–192.1 °C; 99:1 dr; <sup>1</sup>H NMR (400 MHz, CDCl<sub>3</sub>) δ 8.22 (dd, *J* = 8.0, 1.6 Hz, 1H), 7.95 (d, *J* = 8.0 Hz, 2H), 7.59–7.53 (m, 1H), 7.38–7.27 (m, 4H), 4.46 (s, 1H), 3.66 (d, *J* = 7.2 Hz, 1H), 2.78–2.71 (m, 2H), 2.45 (s, 3H), 2.40 (dd, *J* = 12.0, 4.2 Hz, 2H), 2.05 (d, *J* = 3.6 Hz, 1H), 1.87–1.83 (m, 1H), 1.76 (dd, *J* = 10.0, 4.7 Hz, 1H), 1.61 (d, *J* = 11.2 Hz, 1H), 1.51–1.38 (m, 3H), 1.22 (d, *J* = 10.4 Hz, 1H), 1.04–0.90 (m, 3H); <sup>13</sup>C NMR (100 MHz, CDCl<sub>3</sub>) δ 196.8, 176.2, 166.0, 157.1, 145.0, 133.4, 133.0, 129.7, 129.1, 125.9, 125.0,

124.9, 124.5, 118.2, 59.1, 50.2, 50.1, 47.8, 44.8, 43.8, 42.8, 36.3, 36.2, 35.3, 31.3, 21.9.

HRMS (ESI-TOF): calcd. for C<sub>30</sub>H<sub>29</sub>O<sub>3</sub> [M + H]<sup>+</sup> 437.2111; found 437.2109.

Scheme 2, 4u

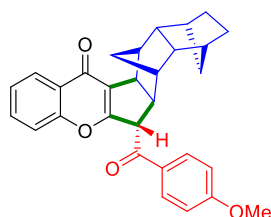

**(±)-6-(4-Methoxybenzoyl)-6a,7,7a,8,9,10,11,11a,12,12a-decahydro-7,12:8,11-dimethanobenzo[5,6]indeno[2,1-*b*] chromen-13(6*H*)-one (4u).** White solid, 72.4 mg, 80% yield, mp 232.6–234.4 °C; 99:1 dr; <sup>1</sup>H NMR (400 MHz, CDCl<sub>3</sub>) δ 8.21 (dd, *J* = 8.0, 1.8 Hz, 1H), 8.03 (d, *J* = 8.8 Hz, 2H), 7.55 (ddd, *J* = 8.8, 7.2, 1.8 Hz, 1H), 7.36–7.29 (m, 2H), 7.01 (d, *J* = 8.8 Hz, 2H), 4.44 (dd, *J* = 3.6, 2.0 Hz, 1H), 3.90 (s, 3H), 3.65 (d, *J* = 7.2 Hz, 1H), 2.75 (dt, *J* = 12.4, 4.0 Hz, 2H), 2.39 (dd, *J* = 9.6, 4.0 Hz, 2H), 2.06 (d, *J* = 3.6 Hz, 1H), 1.84 (dd, *J* = 10.0, 4.8 Hz, 1H), 1.75 (dd, *J* = 10.0, 4.8 Hz, 1H), 1.61 (d, *J* = 11.2 Hz, 1H), 1.49–1.39 (m, 3H), 1.21 (d, *J* = 10.2 Hz, 1H), 1.02–0.91 (m, 3H); <sup>13</sup>C NMR (100 MHz, CDCl<sub>3</sub>) δ 195.7, 176.1, 166.1, 164.2, 157.0, 133.0, 131.3, 128.8, 125.8, 124.9, 124.8, 124.4, 118.2, 114.2, 58.9, 55.7, 50.1, 50.0, 47.8, 44.8, 43.8, 42.8, 36.3, 36.2, 35.3, 31.3. HRMS (ESI-TOF): calcd. for C<sub>30</sub>H<sub>29</sub>O<sub>4</sub> [M + H]<sup>+</sup> 453.2060; found 453.2056.

Scheme 2, 4v

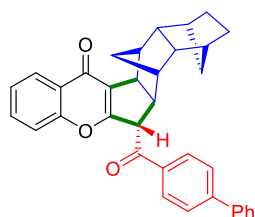

**(±)-6-([1,1'-Biphenyl]-4-carbonyl)-6a,7,7a,8,9,10,11,11a,12,12a-decahydro-7,12:8,11-dimethanobenzo[5,6]indeno[2,1-*b*]chromen-13(6*H*)-one (4v).** Light yellow solid, 53.9 mg, 54% yield, mp 204.6–206.1 °C; 99:1 dr; <sup>1</sup>H NMR (400 MHz, CDCl<sub>3</sub>) δ 8.25 (d, *J* = 8.0 Hz, 1H), 8.14 (d, *J* = 8.0 Hz, 2H), 7.78 (d, *J* = 8.0 Hz, 2H), 7.68 (d, *J* = 7.6 Hz, 2H), 7.59 (t, *J* = 7.8 Hz, 1H), 7.51 (t, *J* = 7.6 Hz, 2H), 7.44 (t, *J* = 7.2 Hz, 1H), 7.40–7.32 (m, 2H), 4.52 (s, 1H), 3.70 (d, *J* = 7.2 Hz, 1H), 2.82 (dd, *J* = 7.4, 3.6 Hz, 1H), 2.77 (d, *J* = 4.6 Hz, 1H), 2.47 (d, *J* = 4.6 Hz, 1H), 2.42 (d, *J* = 3.6 Hz, 1H), 2.09 (d, *J* = 3.6 Hz, 1H), 1.88 (dd, *J* =



10.0, 4.6 Hz, 1H), 1.79 (dd,  $J = 10.0, 4.6$  Hz, 1H), 1.64 (d,  $J = 11.2$  Hz, 1H), 1.47 (dd,  $J = 11.2, 6.8$  Hz, 3H), 1.26 (d,  $J = 10.2$  Hz, 1H), 1.06–0.95 (m, 3H);  $^{13}\text{C}$  NMR (100 MHz,  $\text{CDCl}_3$ )  $\delta$  196.8, 176.2, 165.8, 157.1, 146.6, 139.7, 134.5, 133.1, 129.6, 129.2, 128.6, 127.6, 127.4, 125.9, 125.1, 124.9, 124.5, 118.2, 59.3, 50.2, 50.1, 47.9, 44.9, 43.8, 42.8, 36.4, 36.3, 35.3, 31.4, 31.3. HRMS (ESI-TOF): calcd. for  $\text{C}_{35}\text{H}_{31}\text{O}_3$   $[\text{M} + \text{H}]^+$  499.2268; found 499.2263.

Scheme 2, 4w

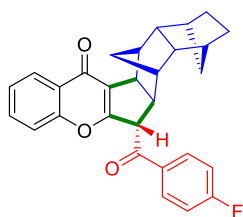

(±)-6-(4-Fluorobenzoyl)-6a,7,7a,8,9,10,11,11a,12,12a-decahydro-7,12:8,11-dimethanobenzo[5,6]indeno[2,1-*b*] chromen-13(6*H*)-one (**4w**). Light yellow solid, 43.7 mg, 50% yield, mp 210.4–212.0 °C; 99:1 dr;  $^1\text{H}$  NMR (400 MHz,  $\text{CDCl}_3$ )  $\delta$  8.22 (d,  $J = 7.8$  Hz, 1H), 8.09 (dd,  $J = 8.6, 5.2$  Hz, 2H), 7.57 (t,  $J = 7.8$  Hz, 1H), 7.36 (t,  $J = 7.6$  Hz, 1H), 7.31 (d,  $J = 8.6$  Hz, 1H), 7.27–7.19 (m, 2H), 4.45 (s, 1H), 3.66 (d,  $J = 7.0$  Hz, 1H), 2.79–2.72 (m, 2H), 2.39 (s, 2H), 2.06 (s, 1H), 1.88–1.84 (m, 1H), 1.77 (dd,  $J = 10.0, 4.4$  Hz, 1H), 1.61 (d,  $J = 11.2$  Hz, 1H), 1.50–1.39 (m, 3H), 1.23 (d,  $J = 10.4$  Hz, 1H), 1.03–0.93 (m, 3H);  $^{13}\text{C}$  NMR (100 MHz,  $\text{CDCl}_3$ )  $\delta$  195.6, 176.1, 165.4, 166.3 (d,  $J = 256.6$  Hz, 1C), 157.0, 133.1, 132.3 (d,  $J = 2.9$  Hz, 1C), 131.7 (d,  $J = 9.4$  Hz, 1C), 125.9, 125.1, 124.9, 124.4, 118.2, 116.2 (d,  $J = 22.0$  Hz, 1C), 59.1, 50.1, 50.0, 47.8, 44.8, 43.8, 42.6, 36.3, 36.2, 35.3, 31.3, 31.2. HRMS (ESI-TOF): calcd. for  $\text{C}_{29}\text{H}_{26}\text{FO}_3$   $[\text{M} + \text{H}]^+$  441.1860; found 441.1858.

Scheme 2, 4x

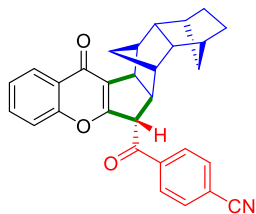

(±)-13-Oxo-6,6a,7,7a,8,9,10,11,11a,12,12a,13-dodecahydro-7,12:8,11-dimethanobenzo[5,6]indeno[2,1-*b*] chromene-6-carbonylbenzonitrile (**4x**). Yellow solid, 36.7 mg, 41% yield, mp 157.9–159.5 °C; 99:1 dr;  $^1\text{H}$  NMR (400 MHz,  $\text{CDCl}_3$ )  $\delta$  8.17 (dd,  $J = 8.0,$

2.0 Hz, 1H), 8.13 (d,  $J = 8.0$  Hz, 2H), 7.84 (d,  $J = 8.0$  Hz, 2H), 7.59–7.53 (m, 1H), 7.34 (t,  $J = 7.6$  Hz, 1H), 7.28–7.24 (m, 1H), 4.45 (t,  $J = 2.4$  Hz, 1H), 3.63 (d,  $J = 7.2$  Hz, 1H), 2.75–2.70 (m, 2H), 2.36 (t,  $J = 5.2$  Hz, 2H), 2.02 (s, 1H), 1.85–1.81 (m, 1H), 1.75 (dd,  $J = 10.0, 4.4$  Hz, 1H), 1.55 (d,  $J = 11.2$  Hz, 1H), 1.47–1.37 (m, 3H), 1.22 (d,  $J = 10.4$  Hz, 1H), 1.01–0.91 (m, 3H);  $^{13}\text{C}$  NMR (100 MHz,  $\text{CDCl}_3$ )  $\delta$  195.9, 176.0, 164.6, 157.0, 138.8, 133.3, 132.8, 129.3, 125.9, 125.2, 125.0, 124.3, 118.1, 117.8, 117.1, 59.3, 50.1, 50.0, 47.8, 44.9, 43.7, 42.4, 36.4, 36.3, 36.2, 35.2, 31.3, 31.2. HRMS (ESI-TOF): calcd. for  $\text{C}_{30}\text{H}_{26}\text{NO}_3$   $[\text{M} + \text{H}]^+$  448.1907; found 441. 448.1901.

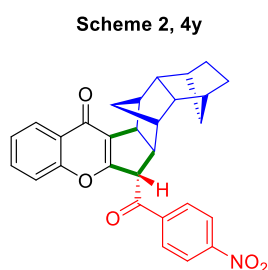

**(±)-6-(4-Nitrobenzoyl)-6a,7,7a,8,9,10,11,11a,12,12a-decahydro-7,12:8,11-dimethanobenzo[5,6]indeno[2,1-*b*] chromen-13(6*H*)-one (4y).** Yellow solid, 39.3 mg, 42% yield, mp 234.6–236.1 °C; 99:1 dr;  $^1\text{H}$  NMR (400 MHz,  $\text{CDCl}_3$ )  $\delta$  8.40 (d,  $J = 8.4$  Hz, 2H), 8.23–8.21 (m, 3H), 7.59 (t,  $J = 7.2$  Hz, 1H), 7.38 (t,  $J = 7.4$  Hz, 1H), 7.30 (d,  $J = 8.4$  Hz, 1H), 4.49 (t,  $J = 2.8$  Hz, 1H), 3.67 (d,  $J = 7.2$  Hz, 1H), 2.79 (dd,  $J = 7.6, 3.6$  Hz, 1H), 2.75 (d,  $J = 4.4$  Hz, 1H), 2.40 (d,  $J = 4.8$  Hz, 2H), 2.06 (d,  $J = 3.6$  Hz, 1H), 1.88 (dd,  $J = 10.0, 4.6$  Hz, 1H), 1.79 (dd,  $J = 10.0, 4.6$  Hz, 1H), 1.59 (d,  $J = 11.2$  Hz, 1H), 1.50–1.40 (m, 3H), 1.26 (d,  $J = 10.4$  Hz, 1H), 1.04–0.96 (m, 3H);  $^{13}\text{C}$  NMR (100 MHz,  $\text{CDCl}_3$ )  $\delta$  195.7, 176.1, 164.5, 157.0, 150.8, 140.3, 133.3, 130.0, 126.0, 125.3, 125.1, 124.4, 124.2, 118.1, 59.6, 50.1, 50.0, 47.9, 44.9, 43.8, 42.4, 36.4, 36.3, 35.3, 31.3, 31.2. HRMS (ESI-TOF): calcd. for  $\text{C}_{29}\text{H}_{26}\text{NO}_5$   $[\text{M} + \text{H}]^+$  468.1805; found 468.1801.

Scheme 2, 4z

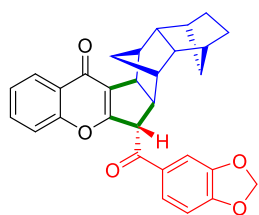

(±)-6-(Benzo[d][1,3]dioxole-5-carbonyl)-6a,7,7a,8,9,10,11,11a,12,12a-decahydro-7,12:8,11-dimethanobenzo[5,6]indeno[2,1-*b*]chromen-13(6*H*)-one (**4z**). Light yellow solid, 67.2 mg, 72% yield, mp 219.6–221.5 °C; 99:1 dr; <sup>1</sup>H NMR (400 MHz, CDCl<sub>3</sub>) δ 8.23 (d, *J* = 8.0 Hz, 1H), 7.66 (d, *J* = 8.2 Hz, 1H), 7.58 (dd, *J* = 8.4, 6.8 Hz, 1H), 7.51 (s, 1H), 7.38–7.30 (m, 2H), 6.94 (dd, *J* = 8.0, 1.4 Hz, 1H), 6.10 (s, 2H), 4.42–4.38 (m, 1H), 3.65 (d, *J* = 7.2 Hz, 1H), 2.74 (d, *J* = 4.8 Hz, 2H), 2.40 (d, *J* = 4.0 Hz, 2H), 2.08 (d, *J* = 3.6 Hz, 1H), 1.86 (dd, *J* = 10.0, 4.6 Hz, 1H), 1.77 (dd, *J* = 10.0, 4.6 Hz, 1H), 1.62 (d, *J* = 11.2 Hz, 1H), 1.51–1.39 (m, 3H), 1.23 (d, *J* = 10.2 Hz, 1H), 1.04–0.94 (m, 3H); <sup>13</sup>C NMR (100 MHz, CDCl<sub>3</sub>) δ 195.4, 176.2, 165.9, 157.1, 152.6, 148.7, 133.1, 130.7, 125.9, 125.5, 125.0, 124.8, 124.4, 118.2, 108.6, 108.2, 102.2, 58.9, 50.2, 50.1, 47.8, 44.8, 43.8, 42.9, 36.3, 36.2, 35.3, 31.4, 31.3. HRMS (ESI-TOF): calcd. for C<sub>30</sub>H<sub>27</sub>O<sub>5</sub> [M + H]<sup>+</sup> 467.1853; found 467.1851.

Scheme 2, 4aa

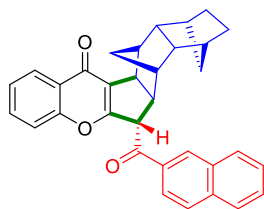

(±)-6-(2-Naphthoyl)-6a,7,7a,8,9,10,11,11a,12,12a-decahydro-7,12:8,11-dimethanobenzo[5,6]indeno[2,1-*b*]chromen-13(6*H*)-one (**4aa**). Light yellow solid, 69.9 mg 74% yield, mp 157.4–159.2 °C; 99:1 dr; <sup>1</sup>H NMR (400 MHz, CDCl<sub>3</sub>) δ 8.60 (d, *J* = 1.8 Hz, 1H), 8.24 (dd, *J* = 8.0, 1.8 Hz, 1H), 8.11 (dd, *J* = 8.8, 1.8 Hz, 1H), 8.05 (d, *J* = 8.0 Hz, 1H), 7.98 (d, *J* = 8.8 Hz, 1H), 7.93 (d, *J* = 8.0 Hz, 1H), 7.69–7.54 (m, 3H), 7.36 (t, *J* = 7.6 Hz, 1H), 7.30 (d, *J* = 8.4 Hz, 1H), 4.67 (dd, *J* = 3.6, 2.0 Hz, 1H), 3.71 (d, *J* = 7.2 Hz, 1H), 2.86 (dd, *J* = 7.6, 3.6 Hz, 1H), 2.78 (d, *J* = 4.6 Hz, 1H), 2.51 (d, *J* = 4.6 Hz, 1H), 2.40 (d, *J* = 4.0 Hz, 1H), 2.04 (d, *J* = 4.2 Hz, 1H), 1.88 (dd, *J* = 10.0, 4.8 Hz, 1H), 1.79 (dd, *J* = 10.0, 4.8 Hz, 1H), 1.63 (d, *J* = 11.2 Hz, 1H), 1.51–1.40 (m, 3H), 1.28 (d, *J* = 10.4 Hz, 1H), 1.04–0.92 (m,

3H);  $^{13}\text{C}$  NMR (100 MHz,  $\text{CDCl}_3$ )  $\delta$  197.2, 176.2, 165.8, 157.1, 136.0, 133.2, 133.1, 132.6, 131.1, 129.9, 129.2, 129.0, 128.0, 127.2, 125.9, 125.0, 124.9, 124.5, 124.4, 118.2, 59.1, 50.2, 50.1, 47.9, 44.9, 43.8, 42.9, 36.4, 36.3, 35.3, 31.3. HRMS (ESI-TOF): calcd. for  $\text{C}_{33}\text{H}_{29}\text{O}_3$   $[\text{M} + \text{H}]^+$  473.2111; found 473.2110.

Scheme 2, 4ab

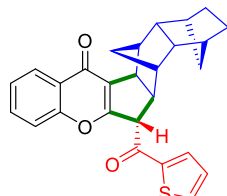

(±)-6-(Thiophene-2-carbonyl)-6a,7,7a,8,9,10,11,11a,12,12a-decahydro-7,12:8,11-dimethanobenzo[5,6]indeno[2,1-*b*]chromen-13(6*H*)-one (4ab). Light yellow solid, 65.1 mg, 76% yield, mp 174.9–176.8 °C; 99:1 dr;  $^1\text{H}$  NMR (400 MHz,  $\text{CDCl}_3$ )  $\delta$  8.21 (dd,  $J = 8.0, 1.6$  Hz, 1H), 7.85 (d,  $J = 4.0$  Hz, 1H), 7.75 (d,  $J = 5.0$  Hz, 1H), 7.60–7.54 (m, 1H), 7.40–7.29 (m, 2H), 7.21 (t,  $J = 4.4$  Hz, 1H), 4.28 (t,  $J = 2.8$  Hz, 1H), 3.67 (d,  $J = 7.1$  Hz, 1H), 2.84 (dd,  $J = 7.6, 3.6$  Hz, 1H), 2.72 (d,  $J = 4.6$  Hz, 1H), 2.39 (t,  $J = 4.0$  Hz, 2H), 2.11 (d,  $J = 3.6$  Hz, 1H), 1.93–1.81 (m, 2H), 1.76 (dd,  $J = 10.0, 4.8$  Hz, 1H), 1.62 (d,  $J = 11.2$  Hz, 1H), 1.53–1.45 (m, 1H), 1.38 (d,  $J = 10.4$  Hz, 1H), 1.22 (d,  $J = 10.4$  Hz, 1H), 1.05–0.93 (m, 3H);  $^{13}\text{C}$  NMR (100 MHz,  $\text{CDCl}_3$ )  $\delta$  190.0, 176.2, 165.2, 157.0, 143.1, 135.2, 133.2, 133.1, 128.6, 125.9, 125.1, 125.0, 124.4, 118.2, 60.8, 50.1, 50.0, 48.0, 44.9, 43.8, 43.2, 36.4, 36.3, 36.2, 35.3, 31.3. HRMS (ESI-TOF): calcd. for  $\text{C}_{27}\text{H}_{25}\text{O}_3\text{S}$   $[\text{M} + \text{H}]^+$  429.1519; found 429.1512.

Scheme 2, 4ac

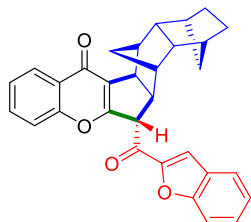

(±)-6-(Benzofuran-2-carbonyl)-6a,7,7a,8,9,10,11,11a,12,12a-decahydro-7,12:8,11-dimethanobenzo[5,6]indeno[2,1-*b*]chromen-13(6*H*)-one (4ac). Yellow solid, 40.7 mg, 44% yield, mp 199.7–201.3 °C; 99:1 dr;  $^1\text{H}$  NMR (400 MHz,  $\text{CDCl}_3$ )  $\delta$  8.23 (d,  $J = 8.0$  Hz, 1H), 7.77 (d,  $J = 8.0$  Hz, 1H), 7.66–7.62 (m, 2H), 7.59–7.52 (m, 2H), 7.40–7.28 (m, 3H),

4.46–4.41 (m, 1H), 3.70 (d,  $J = 7.2$  Hz, 1H), 2.87 (dd,  $J = 7.2, 3.8$  Hz, 1H), 2.75 (d,  $J = 4.6$  Hz, 1H), 2.49 (d,  $J = 4.6$  Hz, 1H), 2.40 (d,  $J = 3.6$  Hz, 1H), 2.09 (d,  $J = 3.6$  Hz, 1H), 1.87 (dd,  $J = 10.0, 4.6$  Hz, 1H), 1.78 (dd,  $J = 10.0, 4.6$  Hz, 1H), 1.63 (d,  $J = 11.2$  Hz, 1H), 1.50–1.42 (m, 3H), 1.27–1.23 (m, 1H), 1.06–0.93 (m, 3H);  $^{13}\text{C}$  NMR (100 MHz,  $\text{CDCl}_3$ )  $\delta$  188.0, 176.2, 164.8, 157.1, 156.1, 151.7, 133.2, 129.0, 127.1, 125.9, 125.2, 125.1, 124.5, 124.4, 123.7, 118.2, 114.7, 112.7, 60.1, 50.2, 50.1, 48.0, 44.9, 43.9, 43.0, 36.4, 36.3, 36.2, 35.3, 31.4. HRMS (ESI-TOF): calcd. for  $\text{C}_{31}\text{H}_{27}\text{O}_4$   $[\text{M} + \text{H}]^+$  463.1904; found 463.1898.

Scheme 2, 4ad

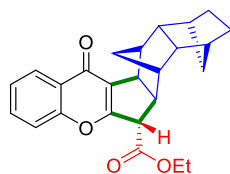

(±)-Ethyl-13-oxo-6,6a,7,7a,8,9,10,11,11a,12,12a,13-dodecahydro-7,12:8,11-dimethanobenzo[5,6]indeno[2,1-*b*]chromene-6-carboxylate (4ad). Light yellow solid, 60.9 mg, 78% yield, mp 132.6–134.3 °C; 99:1 dr;  $^1\text{H}$  NMR (400 MHz,  $\text{CDCl}_3$ )  $\delta$  8.22 (dd,  $J = 8.0, 1.6$  Hz, 1H), 7.64–7.58 (m, 1H), 7.44–7.35 (m, 2H), 4.23 (qd,  $J = 7.2, 2.0$  Hz, 2H), 3.60 (d,  $J = 7.3$  Hz, 1H), 3.56–3.49 (m, 1H), 2.80 (dd,  $J = 7.4, 3.8$  Hz, 1H), 2.66 (d,  $J = 4.6$  Hz, 1H), 2.39 (s, 1H), 2.26 (d,  $J = 4.6$  Hz, 1H), 2.22 (s, 1H), 1.84 (dd,  $J = 10.0, 4.8$  Hz, 1H), 1.75 (dd,  $J = 10.0, 4.8$  Hz, 1H), 1.66 (d,  $J = 11.0$  Hz, 1H), 1.50 (d,  $J = 6.8$  Hz, 2H), 1.29 (t,  $J = 7.2$  Hz, 3H), 1.23 (d,  $J = 10.6$  Hz, 1H), 1.15 (d,  $J = 10.6$  Hz, 1H), 1.02 (d,  $J = 9.2$  Hz, 3H);  $^{13}\text{C}$  NMR (100 MHz,  $\text{CDCl}_3$ )  $\delta$  176.3, 171.2, 164.3, 157.1, 133.2, 125.9, 125.1, 124.5, 124.4, 118.2, 61.7, 56.8, 50.1, 50.0, 47.9, 44.5, 43.6, 42.6, 36.5, 36.4, 36.0, 35.3, 31.4, 31.3, 14.3. HRMS (ESI-TOF): calcd. for  $\text{C}_{25}\text{H}_{27}\text{O}_4$   $[\text{M} + \text{H}]^+$  391.1904; found 391.1906.

Scheme 3, 4ae

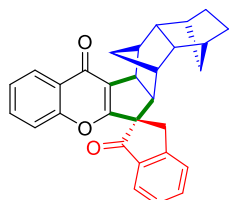

(±)-6a',7',7a',8',9',10',11',11a',12',12a'-Decahydro-13'H-spiro[indene-2,6'-[7,12:8,1]dimethanobenzo[5,6]indeno[2,1-*b*]chromene]-1,13'(3*H*)-dione (4ae). Light yellow solid, 36.5 mg, 42% yield, mp 222.2–224.0 °C; 99:1 dr;  $^1\text{H}$  NMR (400 MHz,  $\text{CDCl}_3$ )  $\delta$

8.21 (dd,  $J = 8.0, 1.6$  Hz, 1H), 7.81 (d,  $J = 7.6$  Hz, 1H), 7.71 (t,  $J = 7.4$  Hz, 1H), 7.58 (d,  $J = 7.6$  Hz, 1H), 7.54–7.45 (m, 2H), 7.34 (t,  $J = 7.6$  Hz, 1H), 7.19 (d,  $J = 8.4$  Hz, 1H), 3.82 (d,  $J = 7.2$  Hz, 1H), 3.53 (q,  $J = 17.6$  Hz, 2H), 2.81 (d,  $J = 7.2$  Hz, 1H), 2.75 (d,  $J = 4.4$  Hz, 1H), 2.44 (d,  $J = 3.6$  Hz, 1H), 2.29 (d,  $J = 4.8$  Hz, 1H), 2.07–2.02 (m, 1H), 1.85–1.76 (m, 3H), 1.51–1.43 (m, 2H), 1.27 (d,  $J = 10.0$  Hz, 1H), 1.19 (d,  $J = 10.0$  Hz, 1H), 1.06–0.93 (m, 3H);  $^{13}\text{C}$  NMR (100 MHz,  $\text{CDCl}_3$ )  $\delta$  205.4, 176.1, 167.7, 156.9, 153.3, 135.7, 134.8, 133.0, 128.2, 126.5, 125.9, 125.1, 125.0, 124.5, 123.9, 118.1, 64.4, 50.2, 49.9, 45.5, 44.7, 43.4, 43.0, 37.0, 36.4, 36.3, 35.5, 33.1, 31.5, 31.4. HRMS (ESI-TOF): calcd. for  $\text{C}_{30}\text{H}_{27}\text{O}_3$  [ $\text{M} + \text{H}$ ] $^+$  435.1955; found 435.1953.

Scheme 3, 4af

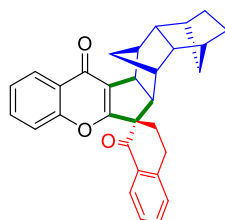

**(±)-3,4,6a',7',7a',8',9',10',11',11a',12',12a'-Dodecahydro-1H,13'H-spiro[naphthalene-2,6'-[7,12:8,11]dimethanobenzo[5,6]indeno[2,1-b]chromene]-1,13'-dione (4af).**

Yellow solid, 26.9 mg, 30% yield, mp 234.9–236.0 °C; 99:1 dr;  $^1\text{H}$  NMR (400 MHz,  $\text{CDCl}_3$ )  $\delta$  8.20 (d,  $J = 7.8$  Hz, 1H), 8.01 (d,  $J = 7.8$  Hz, 1H), 7.53 (t,  $J = 7.6$  Hz, 2H), 7.35–7.29 (m, 3H), 7.24 (s, 1H), 3.69 (d,  $J = 7.0$  Hz, 1H), 3.25–3.20 (m, 2H), 2.77–2.63 (m, 3H), 2.48–2.35 (m, 3H), 2.03 (t,  $J = 4.0$  Hz, 1H), 1.82 (dd,  $J = 10.0, 4.4$  Hz, 1H), 1.76 (dd,  $J = 10.0, 4.8$  Hz, 1H), 1.70 (d,  $J = 11.2$  Hz, 1H), 1.48–1.42 (m, 2H), 1.34 (d,  $J = 10.0$  Hz, 1H), 1.16 (d,  $J = 10.0$  Hz, 1H), 1.00–0.93 (m, 3H);  $^{13}\text{C}$  NMR (100 MHz,  $\text{CDCl}_3$ )  $\delta$  197.2, 176.2, 168.3, 156.9, 143.9, 134.1, 132.9, 130.8, 128.9, 128.7, 127.1, 126.0, 125.0, 124.7, 124.1, 118.2, 60.4, 50.3, 50.2, 45.1, 44.9, 43.0, 42.1, 37.8, 36.4, 36.2, 35.5, 31.5, 31.4, 26.2, 25.6. HRMS (ESI-TOF): calcd. for  $\text{C}_{31}\text{H}_{29}\text{O}_3$  [ $\text{M} + \text{H}$ ] $^+$  449.2111; found 449.2102.

## 5. Preparative-scale experiment of compound ( $\pm$ )-**4a**.

A 150 mL flame-dried vial with a stir bar was charged with 3-iodochromone (**1a**, 1.36 g, 5.0 mmol),  $\alpha$ -bromoacetophenone (**2a**, 1.19 g, 6.0 mmol), TCD (**3**, 3.21 g, 20.0 mmol), Pd(OAc)<sub>2</sub> (112.3 mg, 0.5 mmol), P(3-OMe-C<sub>6</sub>H<sub>4</sub>)<sub>3</sub> (352.4 mg, 1.0 mmol), and K<sub>2</sub>CO<sub>3</sub> (2.76 g, 20.0 mmol) in 50 mL of dry *o*-xylene under nitrogen atmosphere at 100 °C for 24 h. After the completion of the reaction detected by thin layer chromatography (TLC), the mixture was cooled to room temperature and purified by flash column chromatography on silica gel (petroleum ether/ethyl acetate = 8:1–1:1) to afford the desired product ( $\pm$ )-**4a** as a light yellow solid (1.10 g, 52%, 99:1 dr).

## 6. X-ray crystal data for compounds (±)-4a, (±)-4v, (±)-4z, (±)-4ad, and (±)-4af

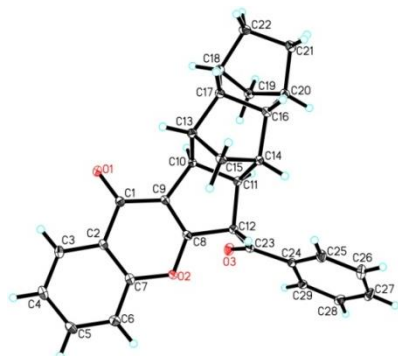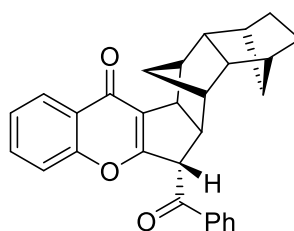

(±)-4a (CCDC: 1826874)

| Compound                                  | (±)-4a                                                        |
|-------------------------------------------|---------------------------------------------------------------|
| Empirical formula                         | C <sub>29</sub> H <sub>26</sub> O <sub>3</sub>                |
| Formula weight                            | 422.50                                                        |
| Temperature/K                             | 100.00(10)                                                    |
| Crystal system                            | monoclinic                                                    |
| Space group                               | Cc                                                            |
| a/Å                                       | 16.1406(8)                                                    |
| b/Å                                       | 12.8442(6)                                                    |
| c/Å                                       | 10.0734(5)                                                    |
| α/°                                       | 90                                                            |
| β/°                                       | 97.501(4)                                                     |
| γ/°                                       | 90                                                            |
| Volume/Å <sup>3</sup>                     | 2070.48(18)                                                   |
| Z                                         | 4                                                             |
| ρ <sub>calc</sub> /cm <sup>3</sup>        | 1.355                                                         |
| μ/mm <sup>-1</sup>                        | 0.086                                                         |
| F(000)                                    | 896.0                                                         |
| Crystal size/mm <sup>3</sup>              | 0.2 × 0.16 × 0.11                                             |
| Radiation                                 | MoKα (λ = 0.71073)                                            |
| θ range for data collection/°             | 3.772 to 29.490                                               |
| Index ranges                              | -21 ≤ h ≤ 15, -17 ≤ k ≤ 16, -11 ≤ l ≤ 13                      |
| Reflections collected                     | 5224                                                          |
| Independent reflections                   | 3244 [R <sub>int</sub> = 0.0259, R <sub>sigma</sub> = 0.0388] |
| Data/restraints/parameters                | 3244/2/289                                                    |
| Goodness-of-fit on F <sup>2</sup>         | 1.062                                                         |
| Final R indexes [I >= 2σ (I)]             | R <sub>1</sub> = 0.0348, wR <sub>2</sub> = 0.0900             |
| Final R indexes [all data]                | R <sub>1</sub> = 0.0360, wR <sub>2</sub> = 0.0912             |
| Largest diff. peak/hole/e Å <sup>-3</sup> | 0.24/-0.20                                                    |



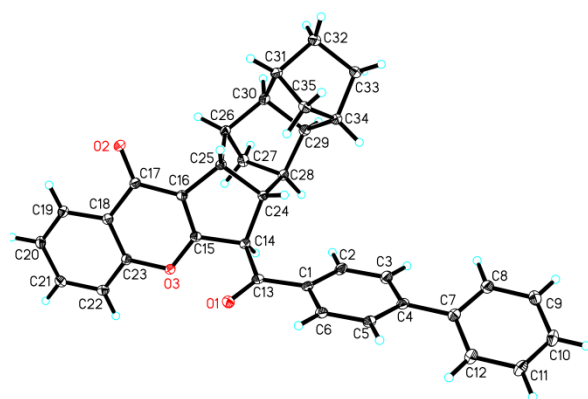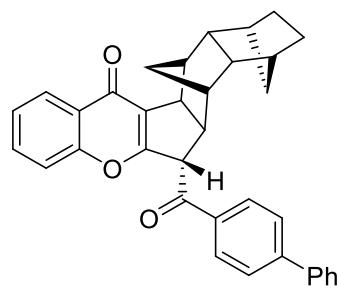

(±)-**4v** (CCDC: 1826875)

| Compound                                  | (±)- <b>4v</b>                                                 |
|-------------------------------------------|----------------------------------------------------------------|
| Empirical formula                         | C <sub>35</sub> H <sub>30</sub> O <sub>3</sub>                 |
| Formula weight                            | 498.59                                                         |
| Temperature/K                             | 100.00(10)                                                     |
| Crystal system                            | triclinic                                                      |
| Space group                               | P-1                                                            |
| a/Å                                       | 11.8871(3)                                                     |
| b/Å                                       | 12.0988(4)                                                     |
| c/Å                                       | 18.3739(7)                                                     |
| α/°                                       | 92.252(3)                                                      |
| β/°                                       | 102.556(3)                                                     |
| γ/°                                       | 100.001(3)                                                     |
| Volume/Å <sup>3</sup>                     | 2531.96(15)                                                    |
| Z                                         | 4                                                              |
| ρ <sub>calc</sub> /cm <sup>3</sup>        | 1.308                                                          |
| μ/mm <sup>-1</sup>                        | 0.082                                                          |
| F(000)                                    | 1056.0                                                         |
| Crystal size/mm <sup>3</sup>              | 0.15 × 0.13 × 0.12                                             |
| Radiation                                 | MoKα (λ = 0.71073)                                             |
| 2θ range for data collection/°            | 6.268 to 59.14                                                 |
| Index ranges                              | -16 ≤ h ≤ 14, -16 ≤ k ≤ 15, -21 ≤ l ≤ 24                       |
| Reflections collected                     | 25396                                                          |
| Independent reflections                   | 11996 [R <sub>int</sub> = 0.0322, R <sub>sigma</sub> = 0.0558] |
| Data/restraints/parameters                | 11996/0/685                                                    |
| Goodness-of-fit on F <sup>2</sup>         | 1.004                                                          |
| Final R indexes [I ≥ 2σ (I)]              | R <sub>1</sub> = 0.0553, wR <sub>2</sub> = 0.1243              |
| Final R indexes [all data]                | R <sub>1</sub> = 0.0749, wR <sub>2</sub> = 0.1389              |
| Largest diff. peak/hole/e Å <sup>-3</sup> | 0.32/-0.27                                                     |

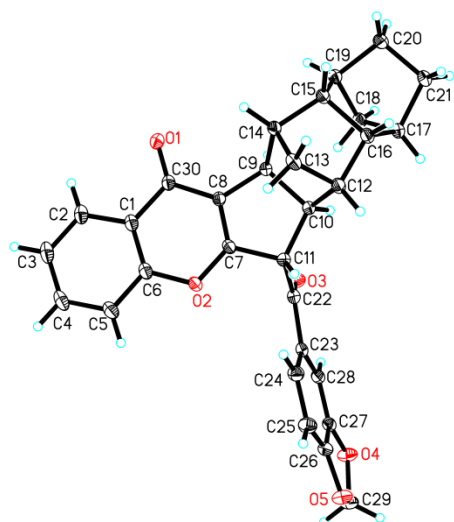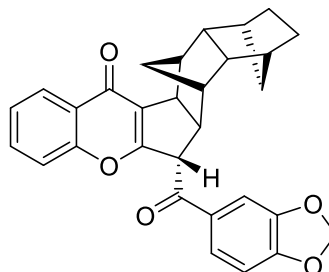

(±)-**4z** (CCDC: 1826876)

| Compound                                  | (±)- <b>4z</b>                                                |
|-------------------------------------------|---------------------------------------------------------------|
| Empirical formula                         | C <sub>30</sub> H <sub>26</sub> O <sub>5</sub>                |
| Formula weight                            | 466.51                                                        |
| Temperature/K                             | 100.00(10)                                                    |
| Crystal system                            | monoclinic                                                    |
| Space group                               | P2 <sub>1</sub> /n                                            |
| a/Å                                       | 14.3416(4)                                                    |
| b/Å                                       | 11.0113(3)                                                    |
| c/Å                                       | 14.5008(4)                                                    |
| α/°                                       | 90                                                            |
| β/°                                       | 105.056(3)                                                    |
| γ/°                                       | 90                                                            |
| Volume/Å <sup>3</sup>                     | 2211.35(11)                                                   |
| Z                                         | 4                                                             |
| ρ <sub>calc</sub> /cm <sup>3</sup>        | 1.401                                                         |
| μ/mm <sup>-1</sup>                        | 0.766                                                         |
| F(000)                                    | 984.0                                                         |
| Crystal size/mm <sup>3</sup>              | 0.14 × 0.12 × 0.11                                            |
| Radiation                                 | CuKα (λ = 1.54184)                                            |
| 2θ range for data collection/°            | 7.724 to 147.358                                              |
| Index ranges                              | -17 ≤ h ≤ 16, -13 ≤ k ≤ 13, -12 ≤ l ≤ 18                      |
| Reflections collected                     | 14548                                                         |
| Independent reflections                   | 4387 [R <sub>int</sub> = 0.0327, R <sub>sigma</sub> = 0.0263] |
| Data/restraints/parameters                | 4387/0/316                                                    |
| Goodness-of-fit on F <sup>2</sup>         | 1.046                                                         |
| Final R indexes [I >= 2σ (I)]             | R <sub>1</sub> = 0.0457, wR <sub>2</sub> = 0.1227             |
| Final R indexes [all data]                | R <sub>1</sub> = 0.0500, wR <sub>2</sub> = 0.1268             |
| Largest diff. peak/hole/e Å <sup>-3</sup> | 0.28/-0.23                                                    |

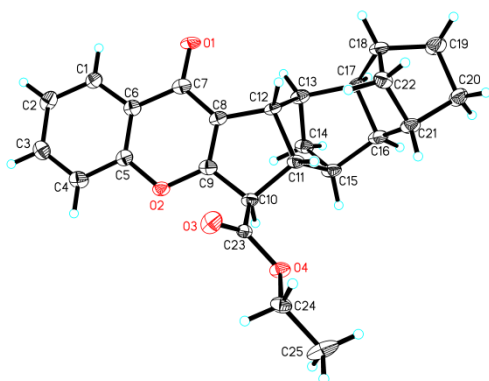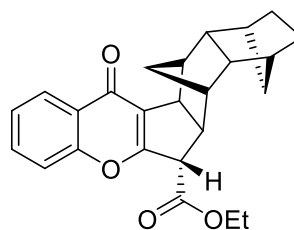

(±)-**4ad** (CCDC: 1826878)

| Compound                                  | (±)- <b>4ad</b>                                                |
|-------------------------------------------|----------------------------------------------------------------|
| Empirical formula                         | C <sub>25</sub> H <sub>26</sub> O <sub>4</sub>                 |
| Formula weight                            | 390.46                                                         |
| Temperature/K                             | 100.00(10)                                                     |
| Crystal system                            | triclinic                                                      |
| Space group                               | P-1                                                            |
| a/Å                                       | 6.28259(10)                                                    |
| b/Å                                       | 18.0959(3)                                                     |
| c/Å                                       | 34.9828(9)                                                     |
| α/°                                       | 89.6453(18)                                                    |
| β/°                                       | 89.8577(16)                                                    |
| γ/°                                       | 83.5587(15)                                                    |
| Volume/Å <sup>3</sup>                     | 3951.98(14)                                                    |
| Z                                         | 8                                                              |
| ρ <sub>calc</sub> /cm <sup>3</sup>        | 1.312                                                          |
| μ/mm <sup>-1</sup>                        | 0.088                                                          |
| F(000)                                    | 1664.0                                                         |
| Crystal size/mm <sup>3</sup>              | 0.15 × 0.13 × 0.11                                             |
| Radiation                                 | MoKα (λ = 0.71073)                                             |
| 2θ range for data collection/°            | 4.152 to 50                                                    |
| Index ranges                              | -7 ≤ h ≤ 7, -21 ≤ k ≤ 21, -41 ≤ l ≤ 41                         |
| Reflections collected                     | 90171                                                          |
| Independent reflections                   | 13935 [R <sub>int</sub> = 0.1317, R <sub>sigma</sub> = 0.0724] |
| Data/restraints/parameters                | 13935/7/1049                                                   |
| Goodness-of-fit on F <sup>2</sup>         | 1.100                                                          |
| Final R indexes [I ≥ 2σ (I)]              | R <sub>1</sub> = 0.1744, wR <sub>2</sub> = 0.3943              |
| Final R indexes [all data]                | R <sub>1</sub> = 0.1921, wR <sub>2</sub> = 0.4025              |
| Largest diff. peak/hole/e Å <sup>-3</sup> | 0.70/-0.74                                                     |

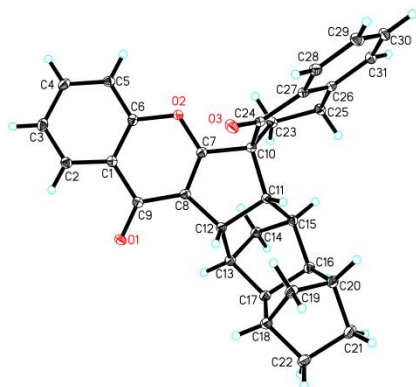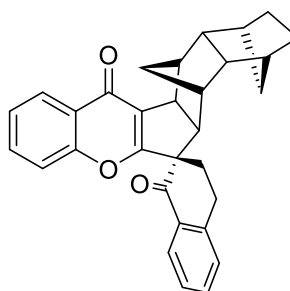

(±)-**4af** (CCDC: 1826880)

| Compound                                  | (±)- <b>4af</b>                                               |
|-------------------------------------------|---------------------------------------------------------------|
| Empirical formula                         | C <sub>31</sub> H <sub>28</sub> O <sub>3</sub>                |
| Formula weight                            | 448.53                                                        |
| Temperature/K                             | 100.00(10)                                                    |
| Crystal system                            | monoclinic                                                    |
| Space group                               | P2 <sub>1</sub> /n                                            |
| a/Å                                       | 10.7710(5)                                                    |
| b/Å                                       | 12.5336(5)                                                    |
| c/Å                                       | 17.4579(7)                                                    |
| α/°                                       | 90                                                            |
| β/°                                       | 106.903(5)                                                    |
| γ/°                                       | 90                                                            |
| Volume/Å <sup>3</sup>                     | 2255.00(17)                                                   |
| Z                                         | 4                                                             |
| ρ <sub>calc</sub> /cm <sup>3</sup>        | 1.321                                                         |
| μ/mm <sup>-1</sup>                        | 0.084                                                         |
| F(000)                                    | 952.0                                                         |
| Crystal size/mm <sup>3</sup>              | 0.16 × 0.13 × 0.12                                            |
| Radiation                                 | MoKα (λ = 0.71073)                                            |
| 2θ range for data collection/°            | 6.944 to 59.014                                               |
| Index ranges                              | -11 ≤ h ≤ 14, -16 ≤ k ≤ 15, -23 ≤ l ≤ 17                      |
| Reflections collected                     | 13506                                                         |
| Independent reflections                   | 5335 [R <sub>int</sub> = 0.0342, R <sub>sigma</sub> = 0.0481] |
| Data/restraints/parameters                | 5335/0/307                                                    |
| Goodness-of-fit on F <sup>2</sup>         | 1.024                                                         |
| Final R indexes [I >= 2σ (I)]             | R <sub>1</sub> = 0.0514, wR <sub>2</sub> = 0.1114             |
| Final R indexes [all data]                | R <sub>1</sub> = 0.0685, wR <sub>2</sub> = 0.1217             |
| Largest diff. peak/hole/e Å <sup>-3</sup> | 0.29/-0.26                                                    |

## 7. <sup>1</sup>H and <sup>13</sup>C NMR spectra of (±)-4a-f

ysy-162-H

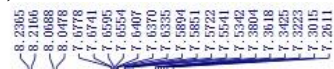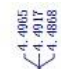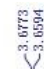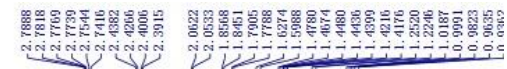

Scheme 2, 4a

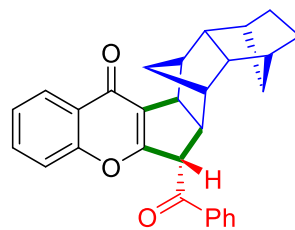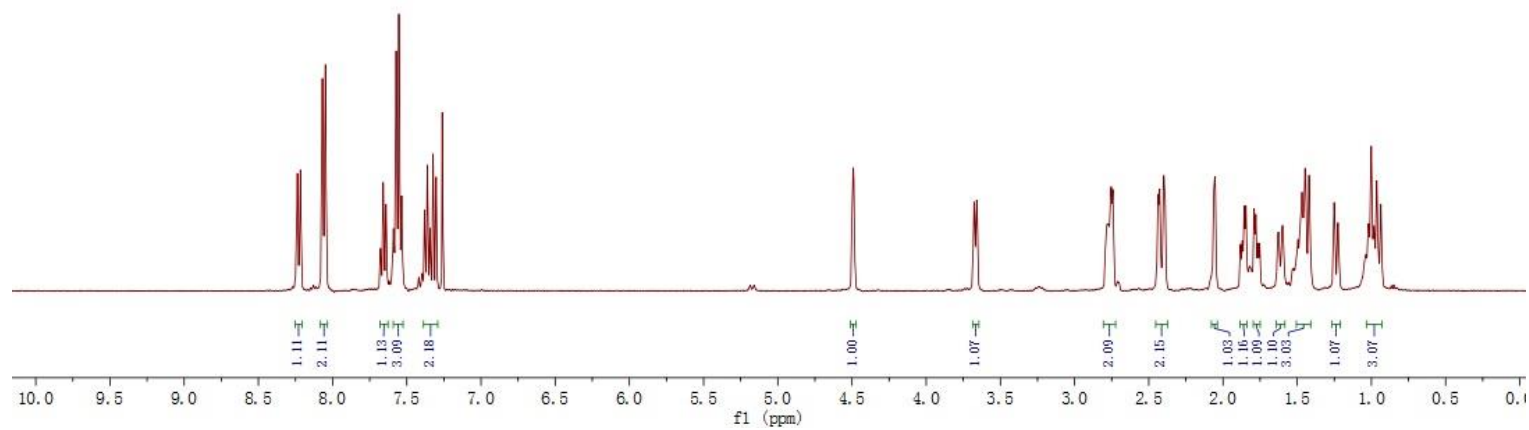

ysy-162-C

—197.2506

—176.1833

—165.7431

—157.1208

135.8972  
133.9634  
133.0829  
129.0415  
129.0068  
125.9415  
125.0534  
124.9316  
124.4910  
118.2330

77.4762  
77.1597  
76.8420

59.2165  
50.1941  
50.1257  
47.8567  
44.8851  
43.8399  
42.7462  
36.3678  
36.2894  
35.3306  
31.3778  
31.3585

Scheme 2, 4a

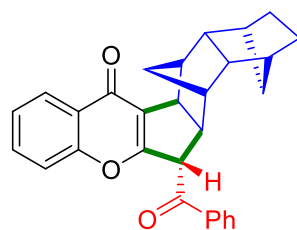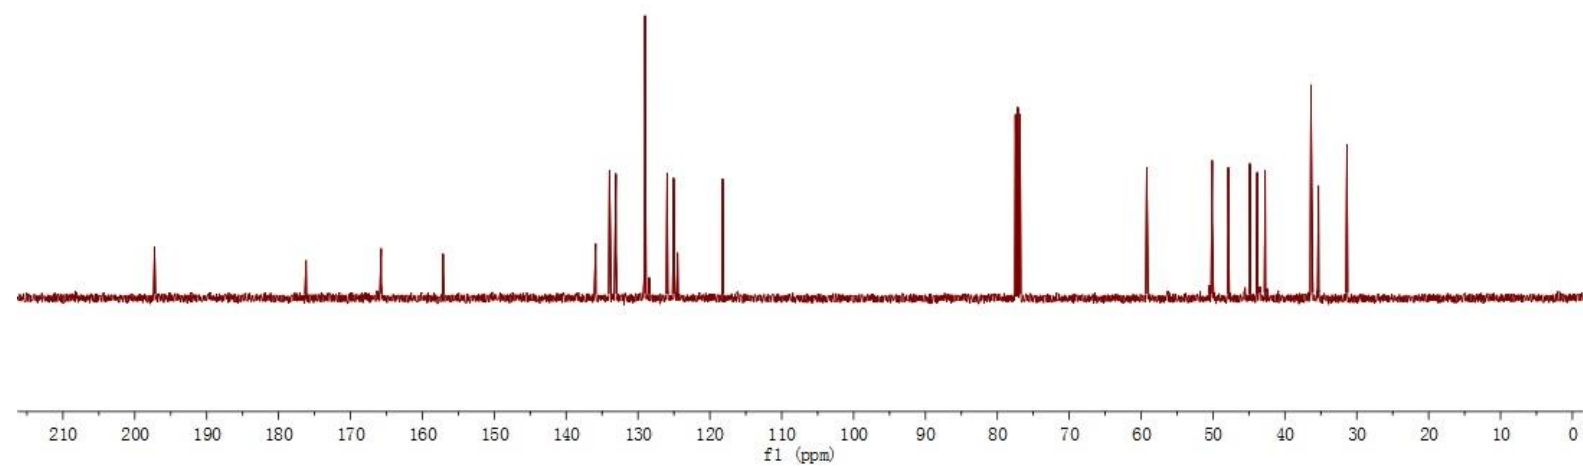

ysy-213-H

8.0472  
8.0285  
7.6368  
7.5508  
7.5319  
7.5129  
7.4266  
7.2897  
6.8437  
6.7670  
6.7463

4.4167  
3.9439  
3.6037  
3.5861  
2.7772  
2.7658  
2.7550  
2.7455  
2.7347  
2.7264  
2.3860  
2.3457  
2.0307  
1.8261  
1.8143  
1.7621  
1.7502  
1.6122  
1.5842  
1.4501  
1.4443  
1.4297  
1.4036  
1.2184  
1.1925  
0.9834  
0.9409

Scheme 2, 4b

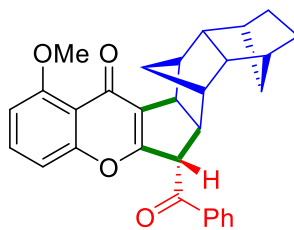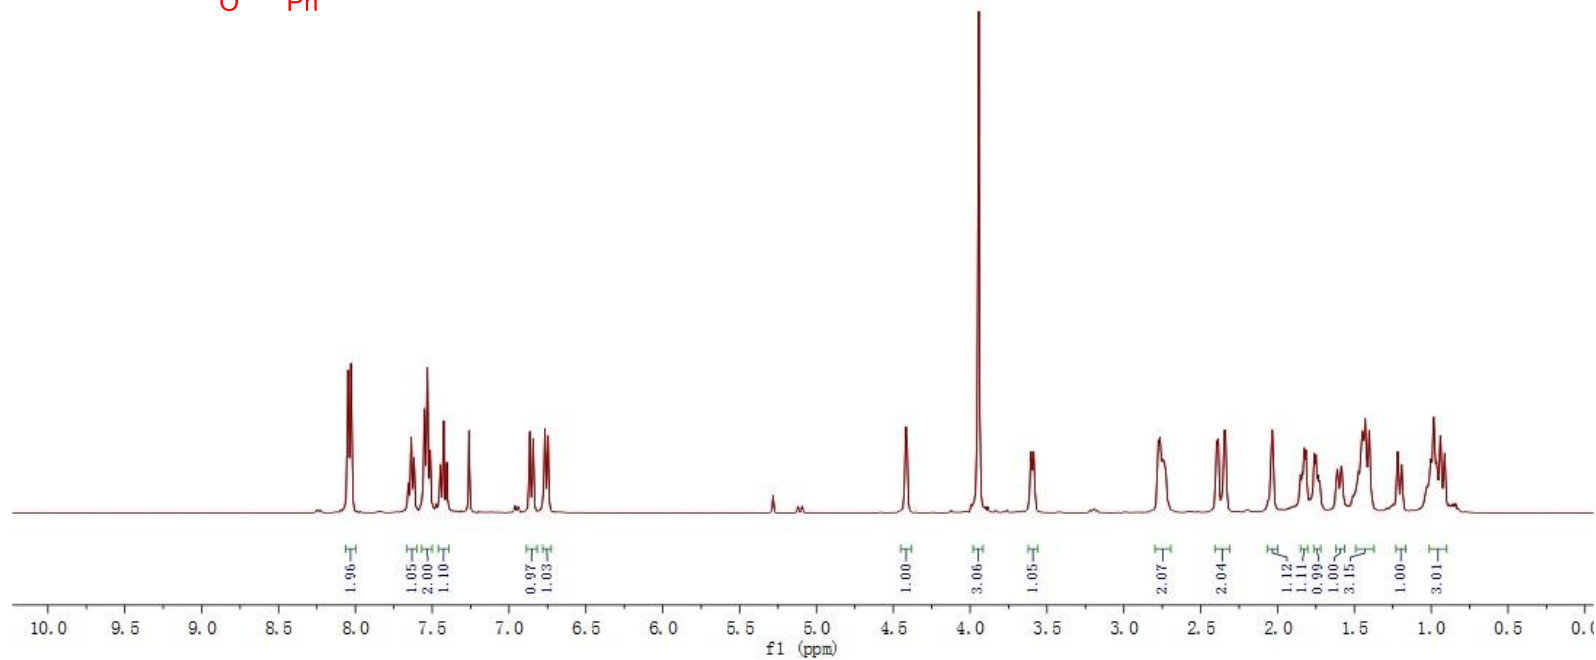

ysy-213-C

197.2869

176.2027

163.1999

160.3634

159.3967

135.9422

133.8619

133.0386

128.9760

128.4018

125.9799

115.1688

110.4343

106.5661

77.4816

77.1632

76.8450

58.9621

56.5087

50.4305

50.1875

50.0756

47.8221

44.9627

43.6885

42.8126

41.0296

36.3408

36.2277

35.3353

31.3722

Scheme 2, 4b

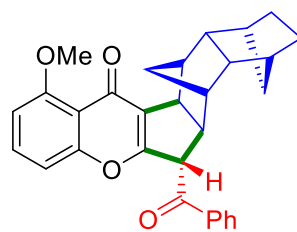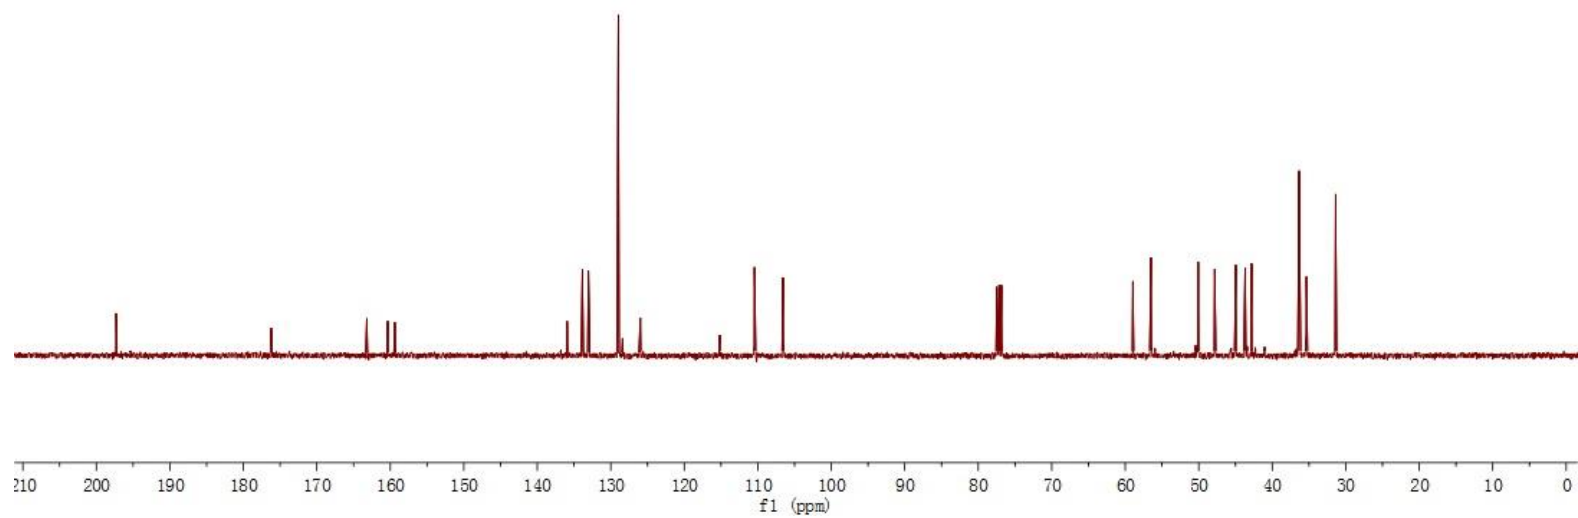



ysy-205-2-H

8.0586  
8.0393  
7.9892  
7.6627  
7.6442  
7.6259  
7.5586  
7.5395  
7.5205  
7.3760  
7.3703  
7.3546  
7.3490  
7.2594  
7.2065  
7.1852

4.4722

3.6623  
3.6444  
2.7761  
2.7680  
2.7593  
2.7447  
2.7365  
2.7247  
2.4142  
2.3937  
2.0410  
1.8394  
1.8275  
1.7729  
1.7612  
1.6198  
1.5919  
1.4615  
1.4268  
1.4007  
1.2279  
1.2019  
1.0042  
0.9873  
0.9483  
0.9214

Scheme 2, 4c

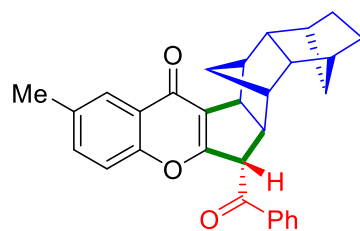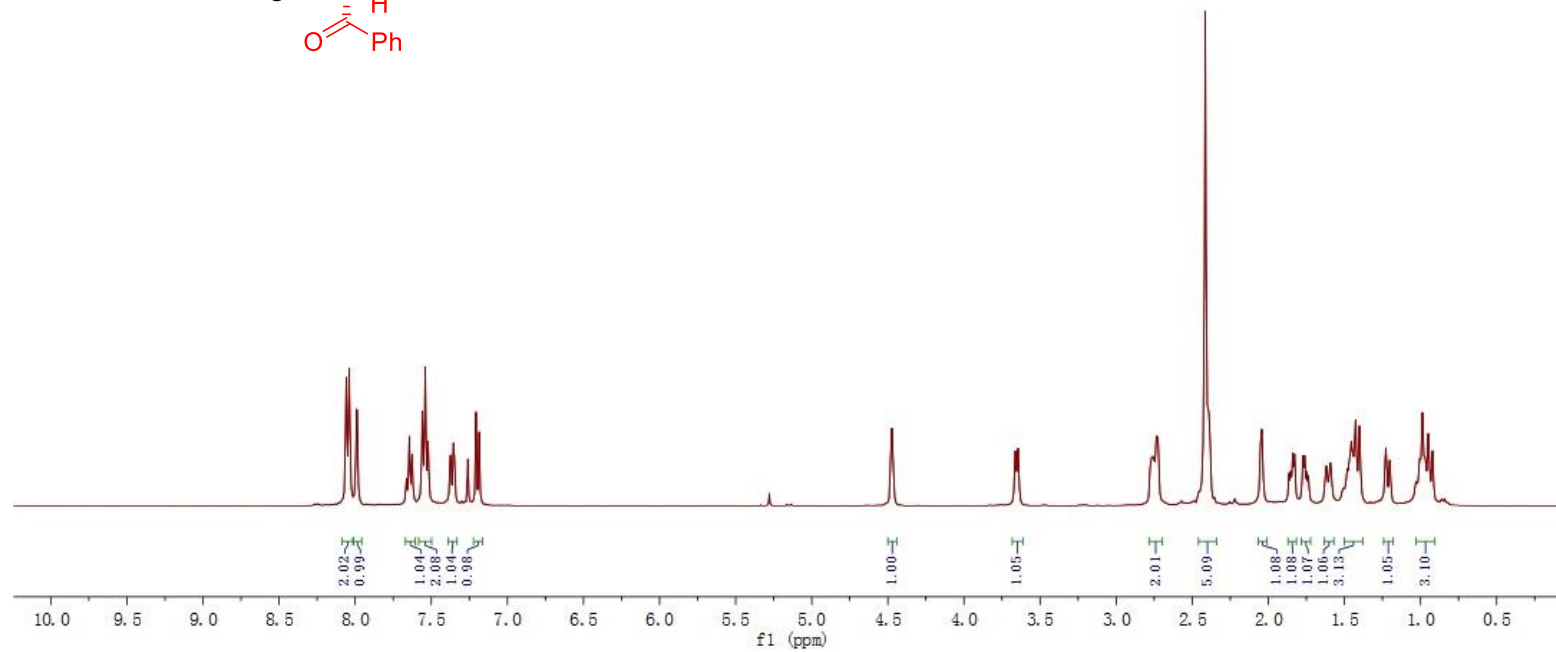

ysy-205-2-C  
 —197.2689  
 —176.2360  
 —165.6239  
 —155.3585  
 135.8426  
 134.8855  
 134.2228  
 133.8892  
 128.9712  
 128.9473  
 125.2062  
 124.6388  
 124.0508  
 117.8895  
 77.4787  
 77.1615  
 76.8407  
 59.1192  
 50.1231  
 50.0684  
 47.7863  
 44.7981  
 43.7839  
 42.6802  
 36.3064  
 36.2233  
 35.2701  
 31.3238  
 31.3014  
 20.9609

Scheme 2, 4c

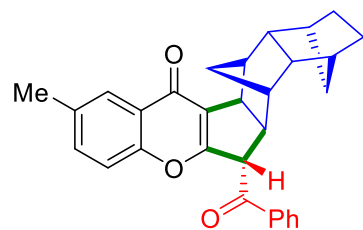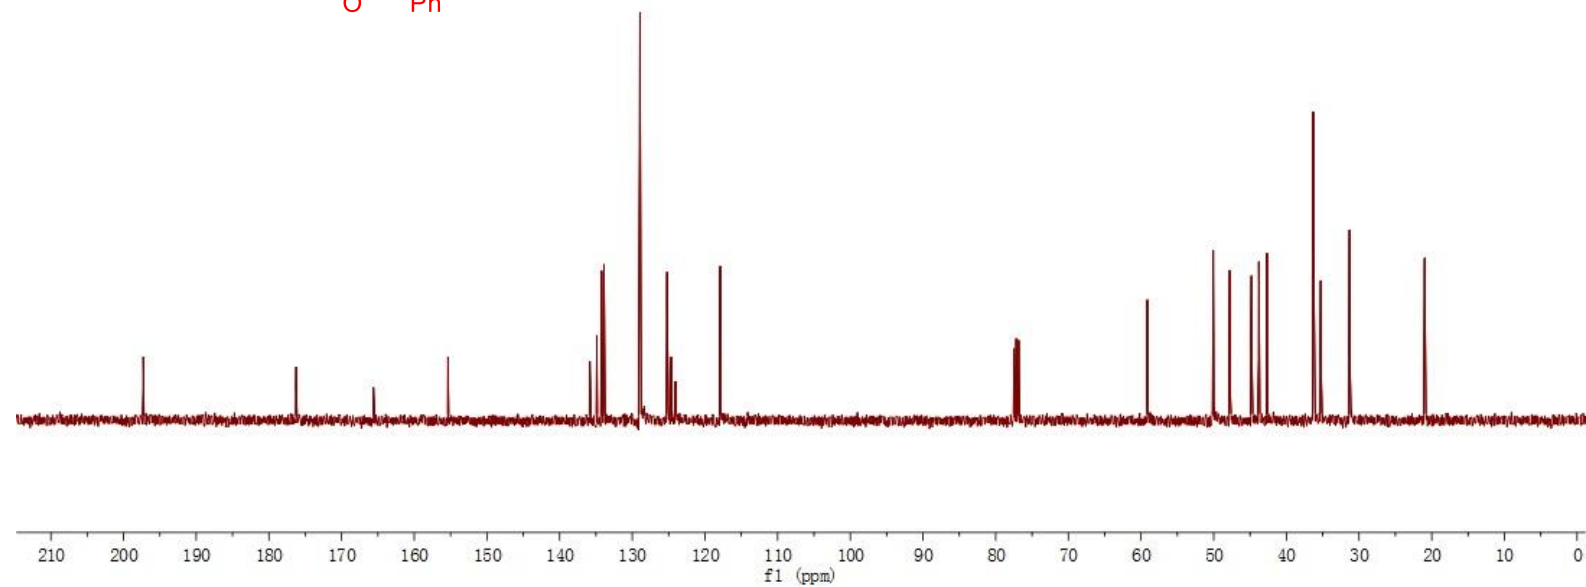



ysy-207-C

—197.3013

—175.9710

—165.6349

—156.8845

—151.9348

—135.8898

—133.9486

—129.0269

—129.0013

—125.1005

—124.1785

—122.8717

—119.5315

—105.2420

77.4810

77.1633

76.8457

—59.1418

—56.0144

50.1815

50.1244

44.8303

43.8264

42.8713

36.2929

35.3304

31.3759

31.3543

### Scheme 2, 4d

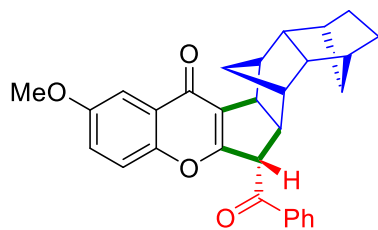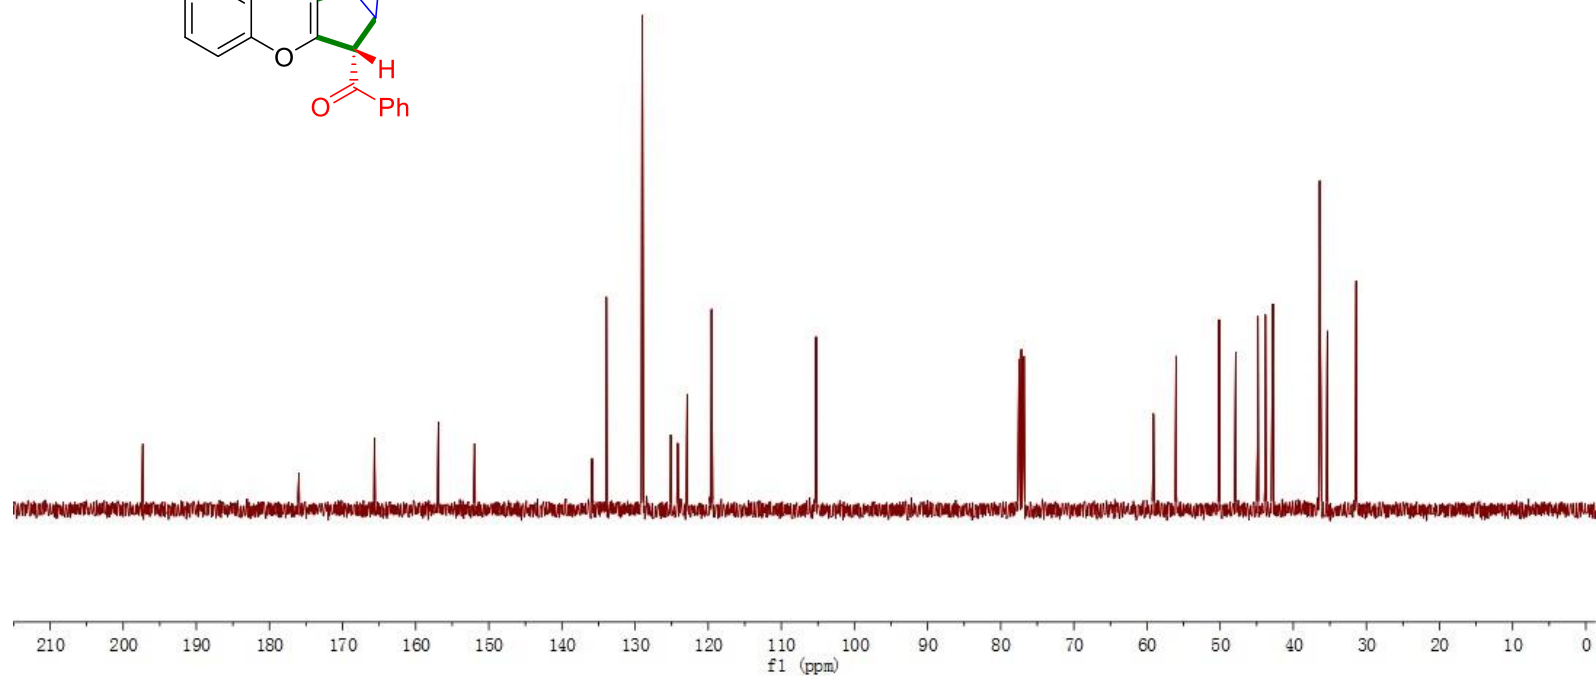

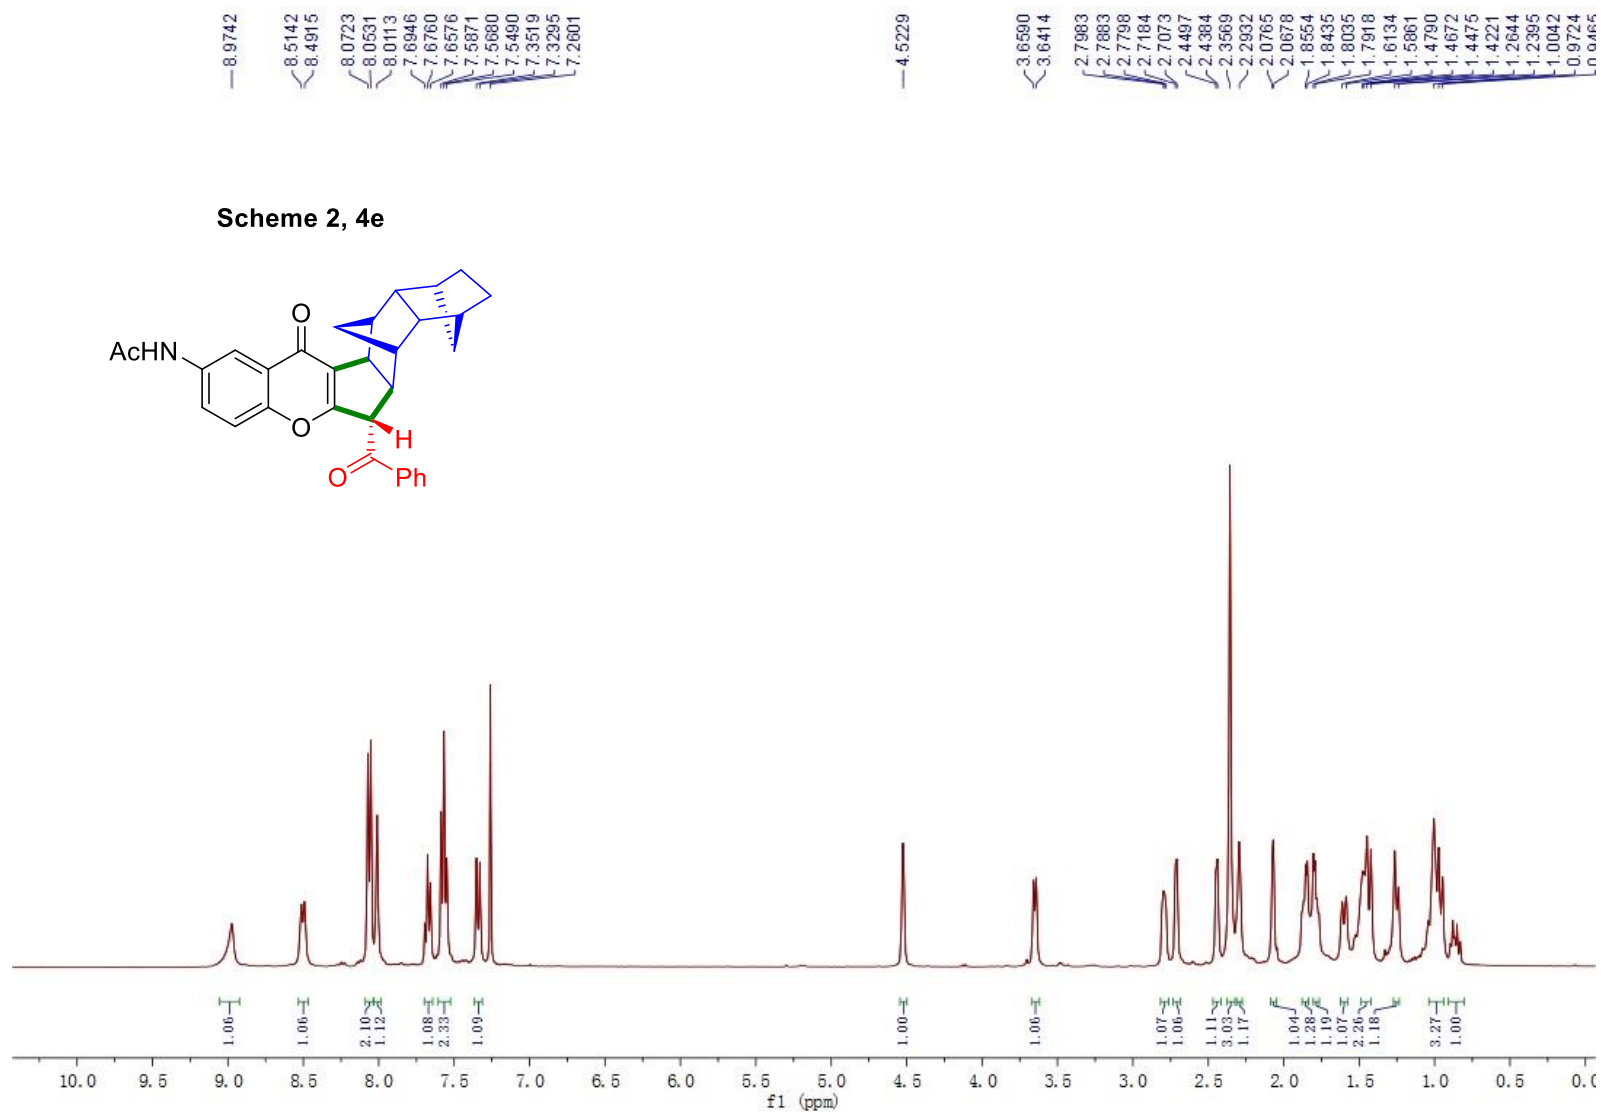

—197.2154  
—176.4263  
—169.5835  
—166.7093  
—153.4531

136.5204  
135.7880  
134.1032  
129.0938  
129.0271  
126.5244  
124.3071  
124.2330  
118.9165  
114.7555

77.4776  
77.1601  
76.8428

—59.0338  
50.1471  
50.0374  
47.7987  
44.9410  
43.8476  
42.6904  
36.3625  
36.3278  
35.2713  
31.3217  
—24.9342

**Scheme 2, 4e**

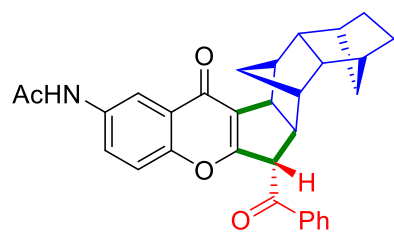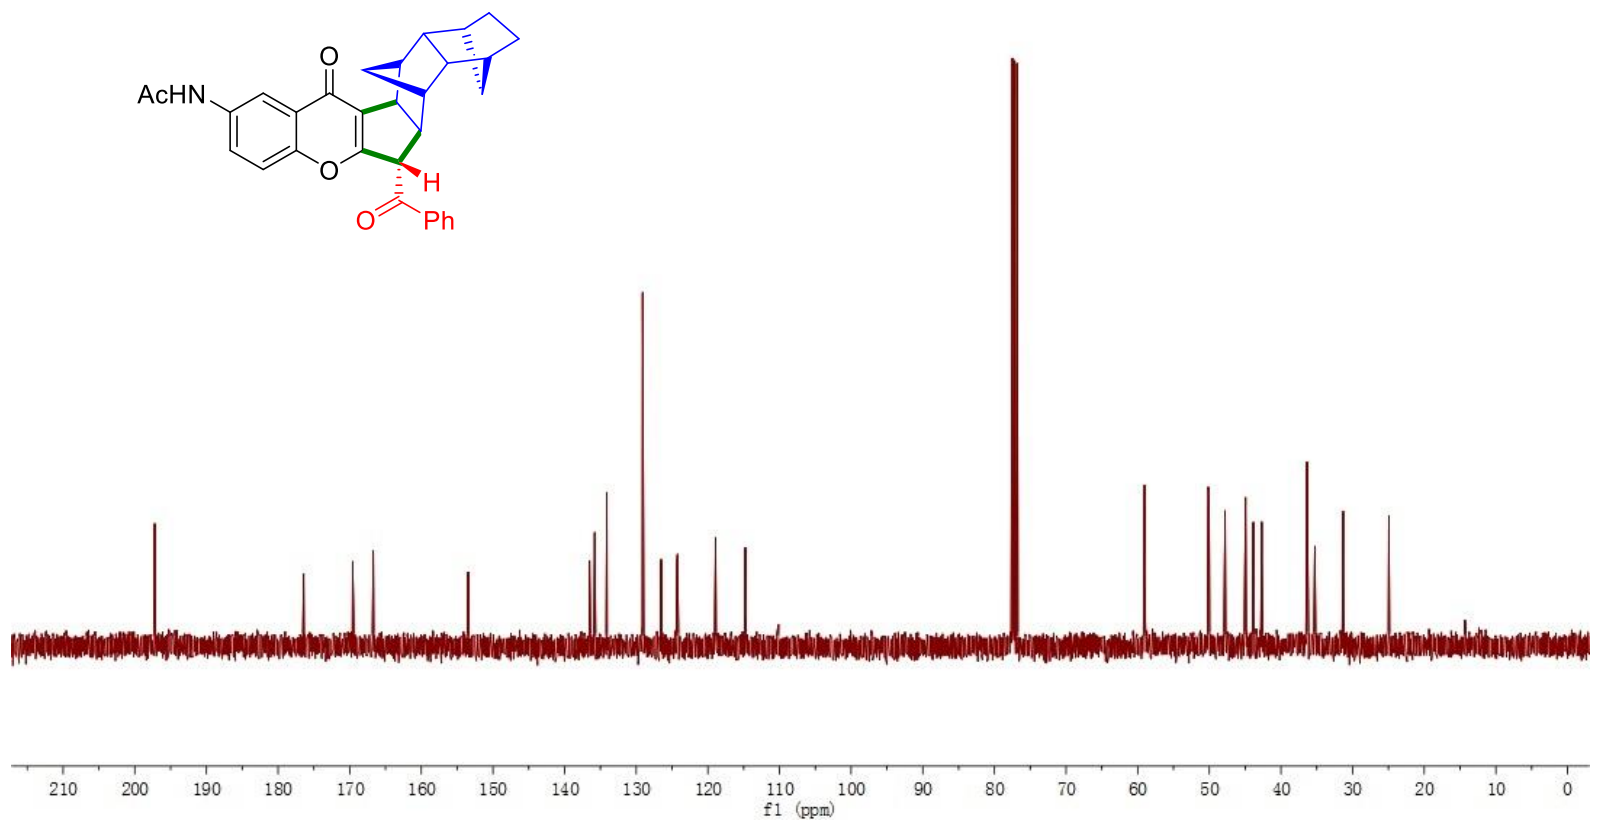

lmz-1-H

8.0675  
8.0392  
7.8621  
7.8558  
7.8415  
7.8346  
7.8277  
7.6642  
7.5752  
7.5565  
7.5373  
7.3414  
7.3304  
7.3179  
7.3177  
7.3069  
7.2882  
7.2597

4.4913

3.6594  
3.6416

2.7792  
2.7705  
2.7602  
2.7519  
2.7301  
2.7189  
2.4605  
2.4590  
2.3895  
2.0471  
1.8559  
1.8445  
1.7934  
1.7817  
1.6345  
1.5735  
1.4740  
1.4643  
1.4545  
1.4316  
1.4045  
1.2772  
1.2595  
1.2472  
1.2327  
1.0172  
0.9982  
0.9795  
0.9692  
0.9514

Scheme 2, 4f

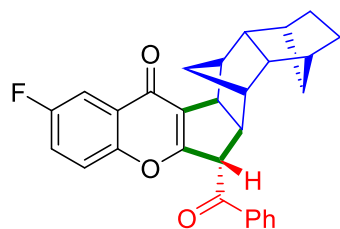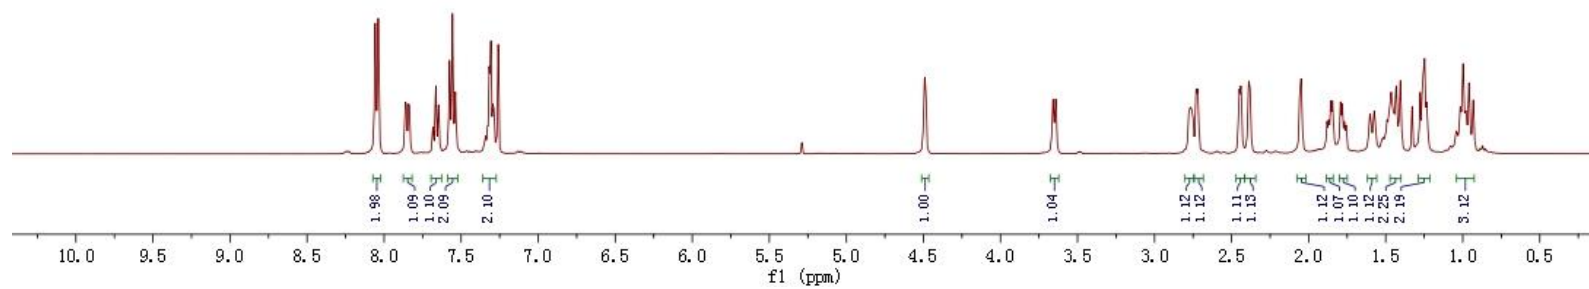

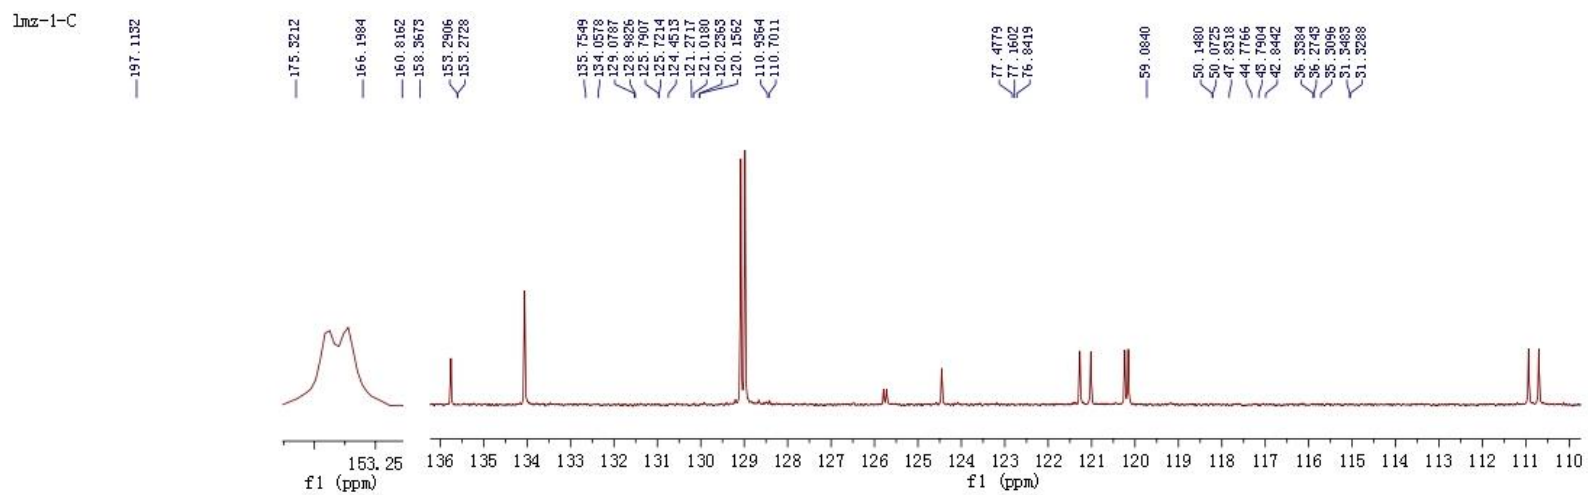

Scheme 2, 4f

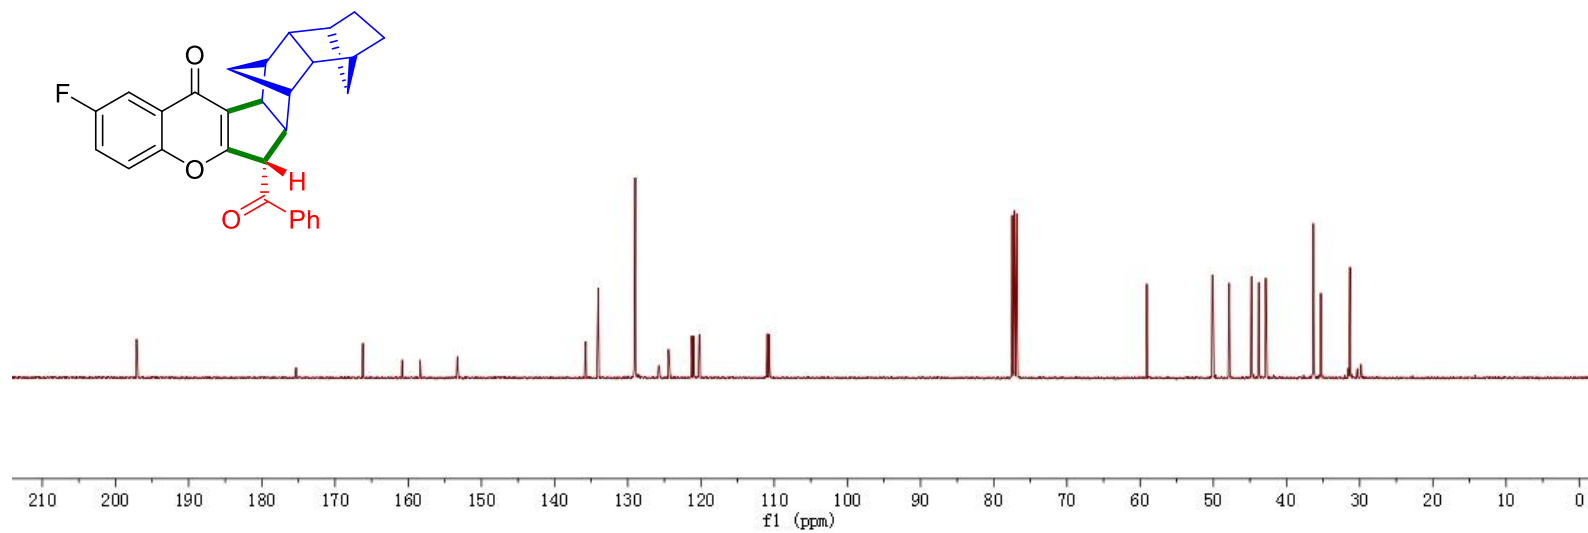



1mz-2-H

8.3364  
8.0522  
8.0355  
7.6865  
7.6785  
7.6605  
7.6666  
7.6527  
7.6418  
7.6376  
7.5712  
7.5578  
7.5998  
7.2597  
7.2272  
7.2211  
7.2050  
7.1989

4.4797

3.6563  
3.6388

2.7559  
2.7261  
2.7181  
2.7106  
2.4420  
2.3922

2.0514  
1.8992  
1.8490  
1.7926  
1.7860  
1.7803  
1.7788  
1.5954  
1.5676  
1.4962  
1.4794  
1.4709  
1.4616  
1.4517  
1.3985  
1.2596  
1.2368  
1.2310  
1.0179  
0.9995  
0.9804  
0.9609

Scheme 2, 4g

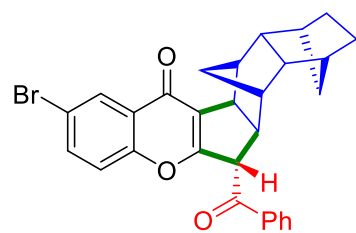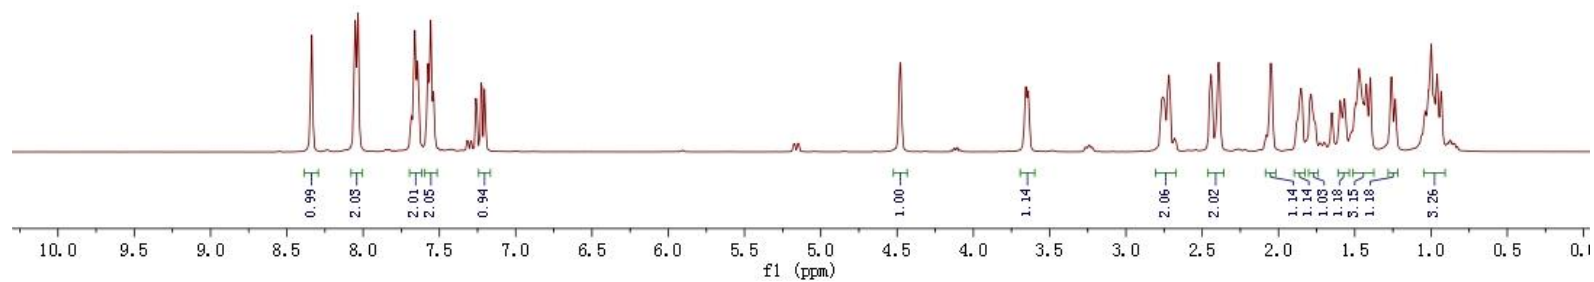

lmz-2-C

197.0602

174.7606

166.0548

155.8979

136.0056  
135.7387  
134.0895  
129.1030  
128.9834  
128.6047  
125.9058  
125.1904  
120.1797  
118.5131

77.4775  
77.1595  
76.8413

59.0988

50.1549  
50.0924  
47.8478  
44.8788  
43.7860  
42.8317  
36.5492  
36.2826  
35.3213  
31.8668  
31.3570

Scheme 2, 4g

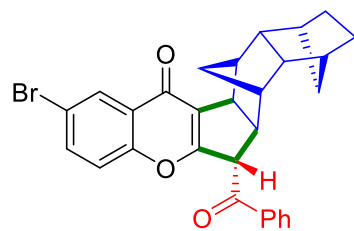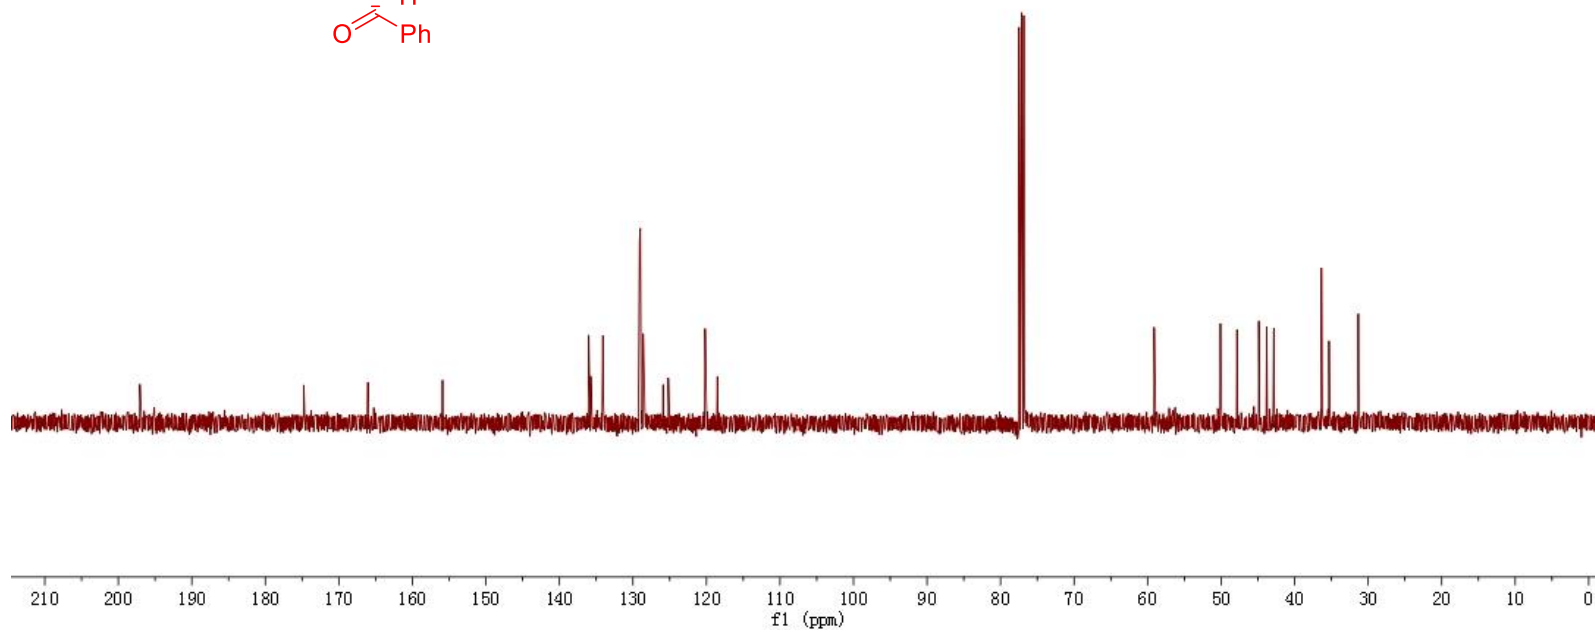

ysy-204-H

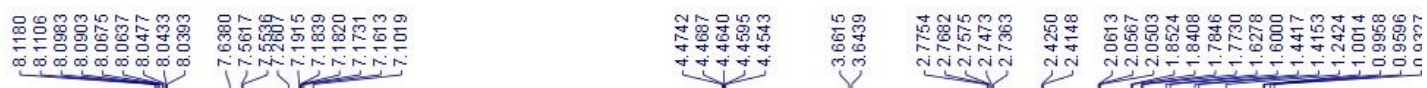

Scheme 2, 4h

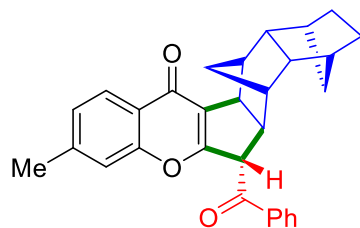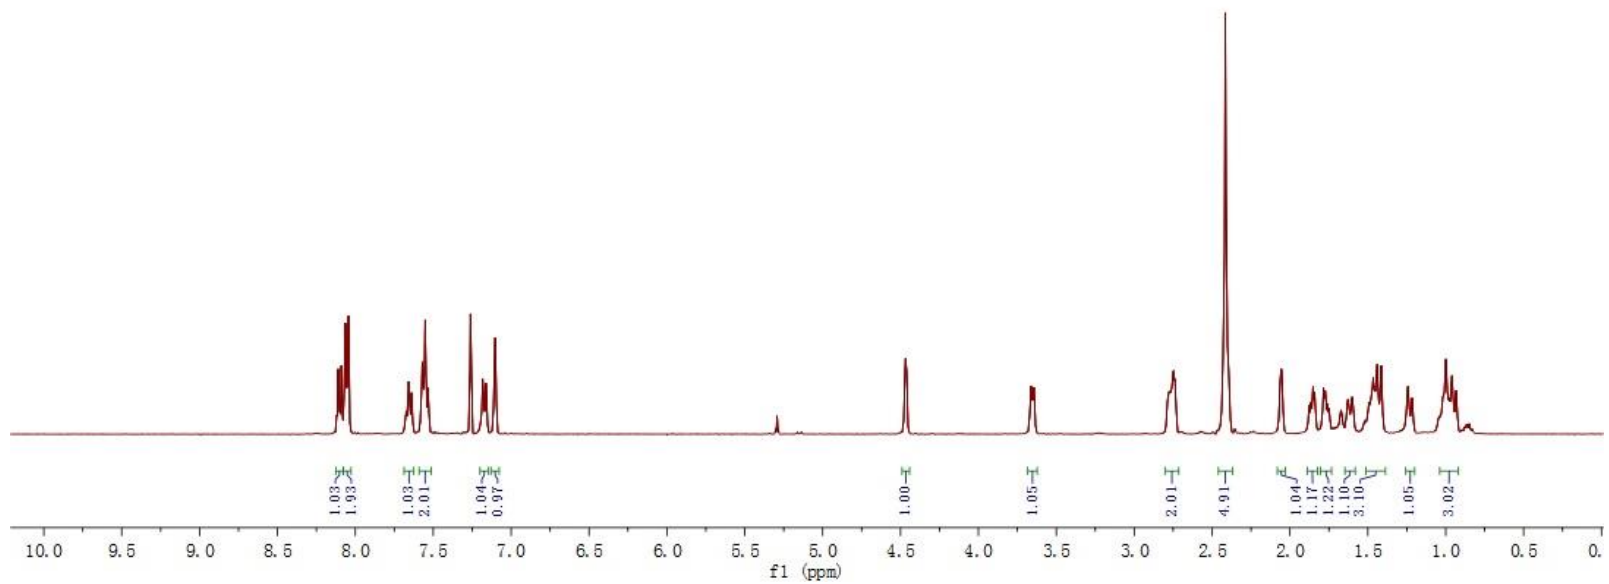

vsy-204-C

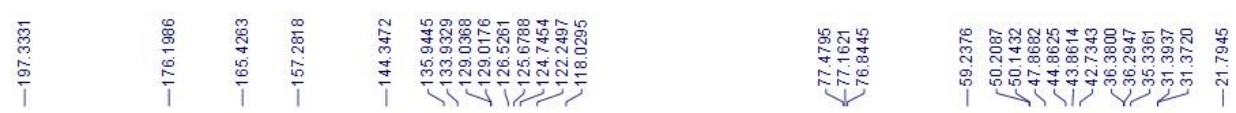

Scheme 2, 4h

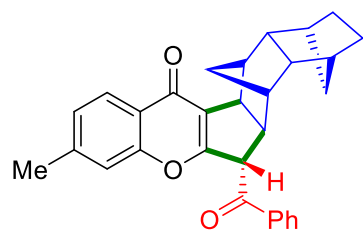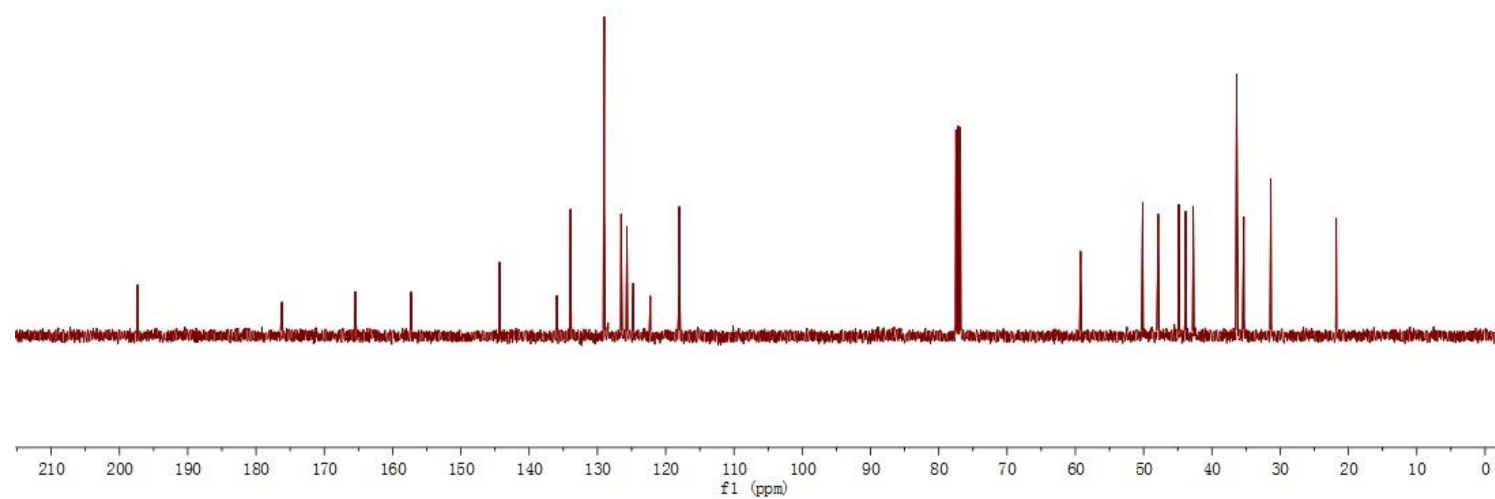



ysy-206-C

—197.3815

—175.6784

—165.0863

—163.6011

—158.8128

—135.8013

—133.8972

—128.9868

—128.9232

—127.0835

—124.6575

—118.2986

—114.1260

—100.5735

—77.4761

—77.1538

—76.8398

—59.0672

—55.8042

—50.1114

—50.0571

—44.7553

—43.7956

—43.8772

—43.8772

—36.1995

—35.2611

—31.3163

—31.2949

Scheme 2, 4i

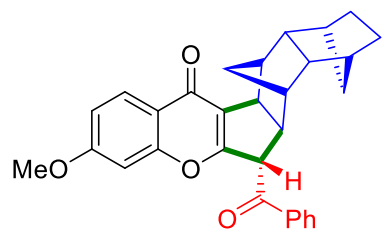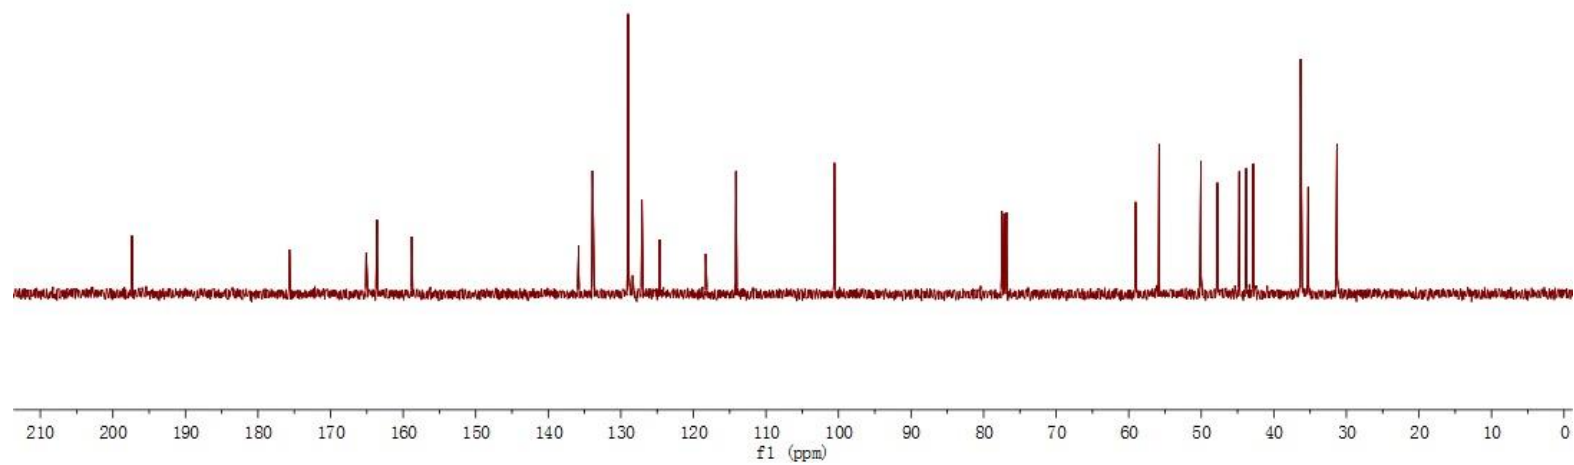

vsy-215-2-H

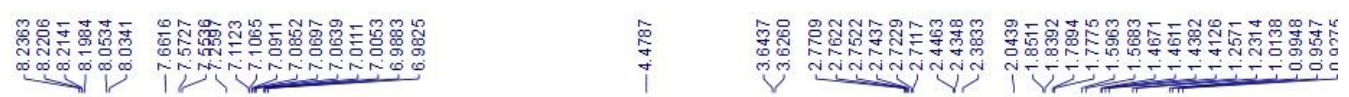

Scheme 2, 4j

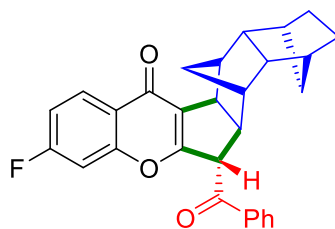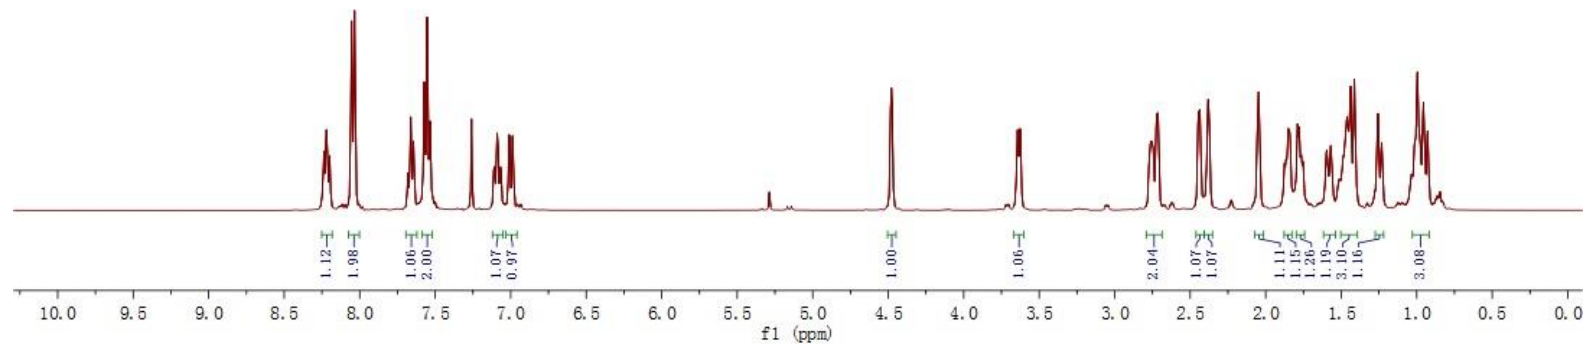

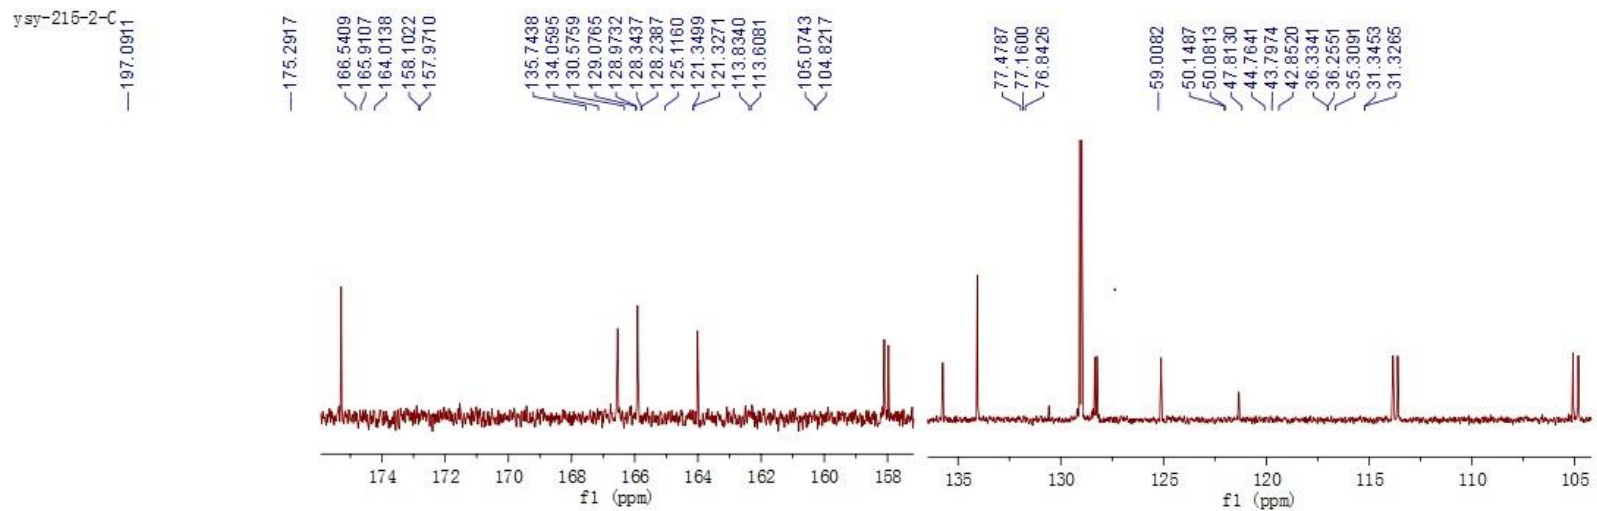

Scheme 2, 4j

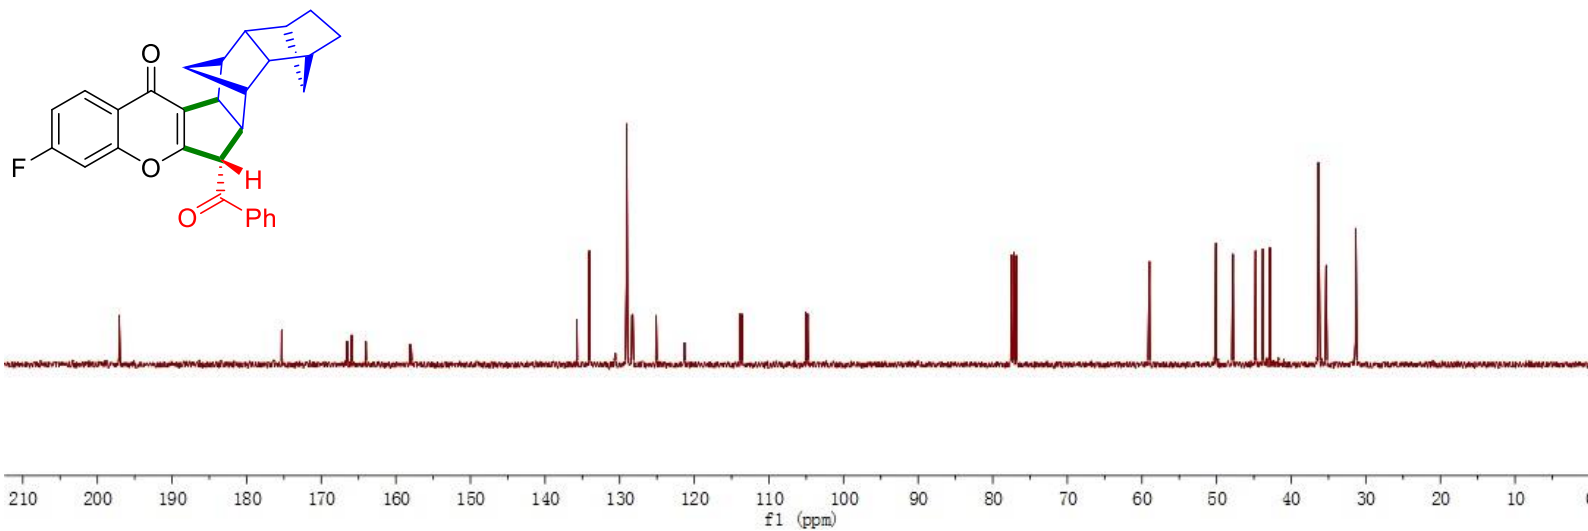



ysy-208-2-H

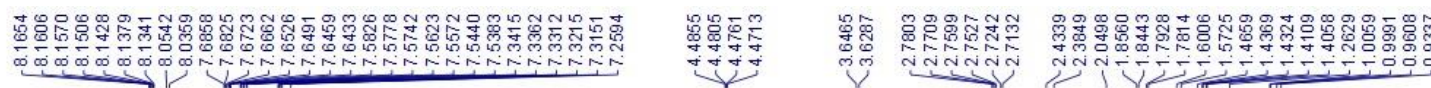

Scheme 2, 4k

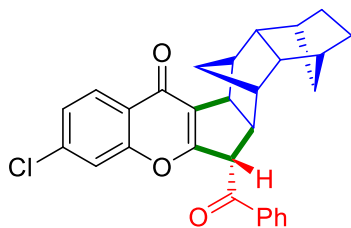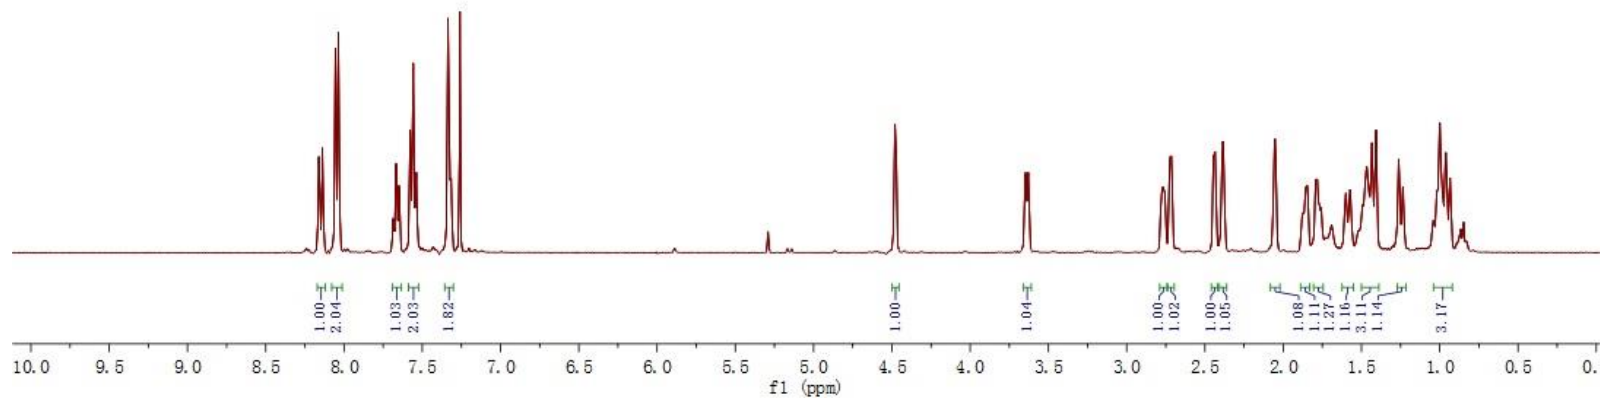

ysy-208-2-C

—196.9987

—175.3316

—165.8660

—157.1592

139.0620

135.7258

134.0635

129.0718

128.9651

127.2354

125.8589

125.2880

123.0196

118.3071

77.4784

77.1600

76.8439

—59.0116

50.1321

50.0669

47.7974

44.7854

43.7733

42.7721

36.3216

36.2573

35.2945

31.3326

31.3154

Scheme 2, 4k

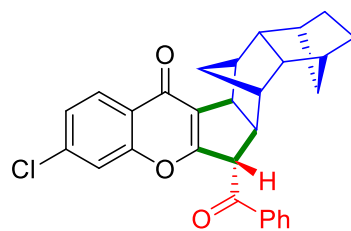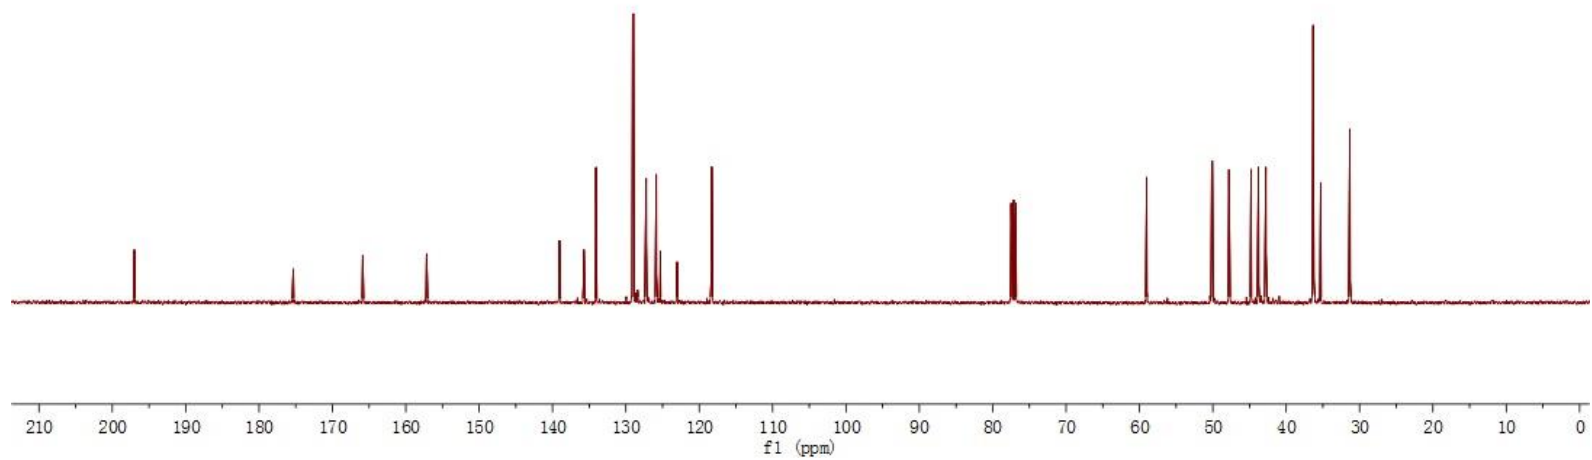

ysy-217-H

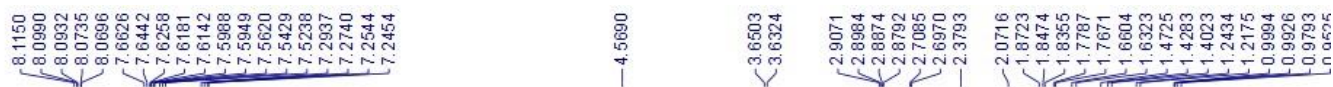

Scheme 2, 4I

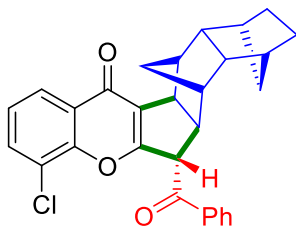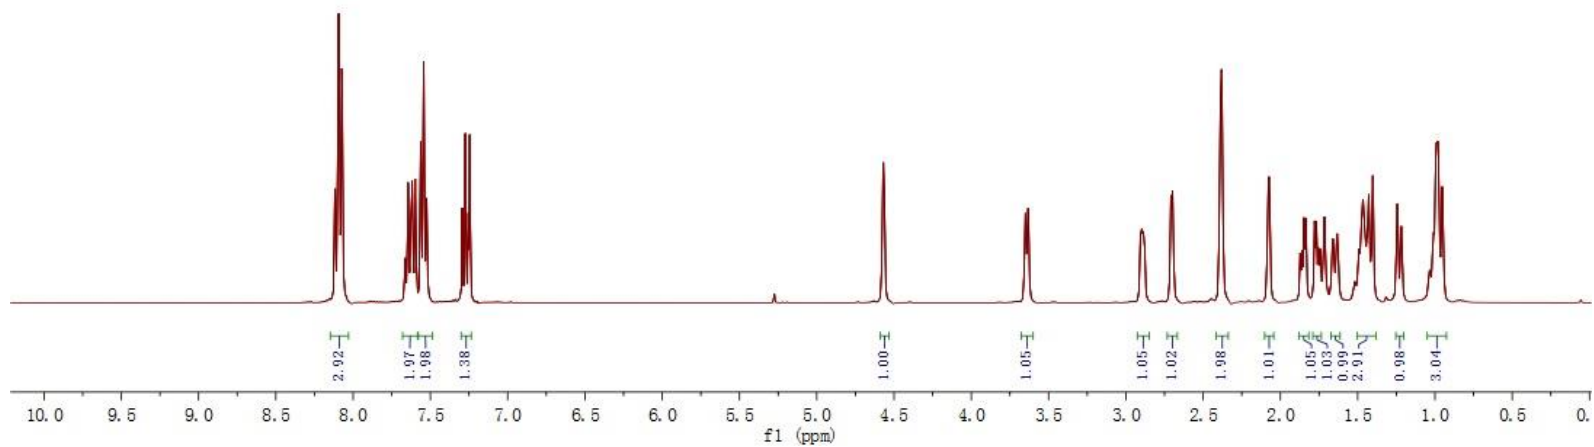

ysy-217-C

—196.7500

—175.4526

—165.5929

—152.7834

135.8954

133.9734

133.4788

129.1766

129.0005

125.9282

125.1089

125.0514

124.5741

123.2773

77.4792

77.1610

76.8423

—59.0372

50.2141

50.1411

47.7770

44.6935

43.7565

42.2034

36.3706

36.3384

35.3453

31.3616

Scheme 2, 4I

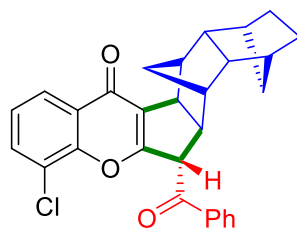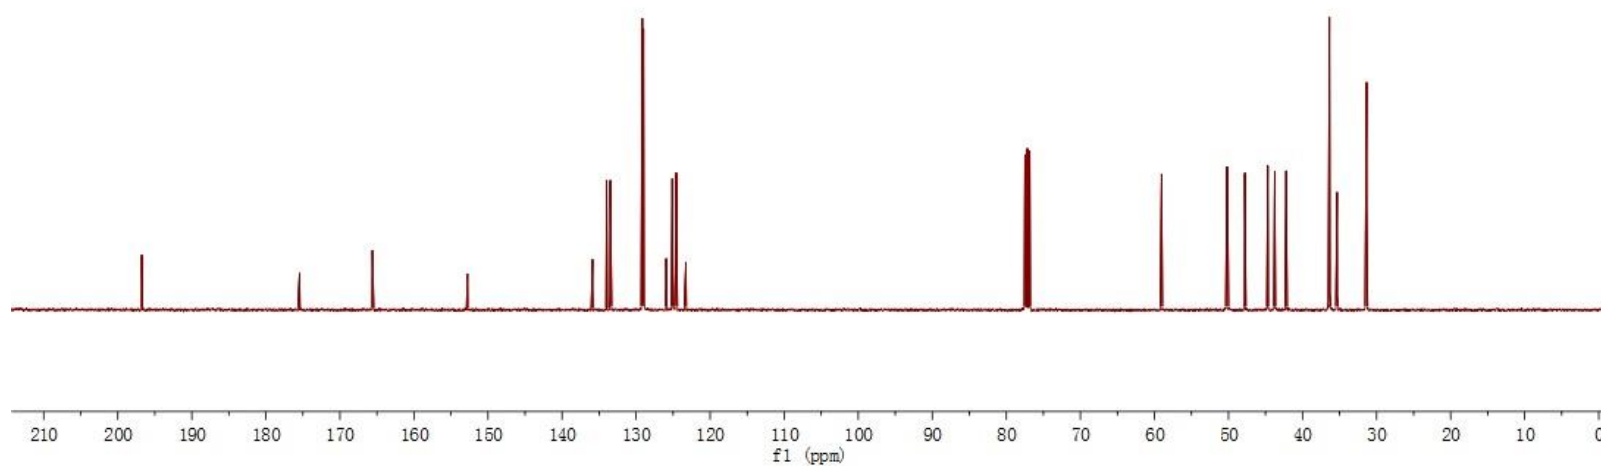

vsy-214-H

8.0431  
8.0238  
7.9063  
7.6514  
7.6328  
7.6144  
7.5472  
7.5283  
7.5093  
7.2457  
7.0584

4.4373

3.6412  
3.6234  
2.7655  
2.7564  
2.7470  
2.7383  
2.7220  
2.7105  
2.3827  
2.3045  
2.2913  
2.0405  
2.0315  
1.8279  
1.8161  
1.7603  
1.7486  
1.4427  
1.4120  
1.4046  
1.3848  
1.2127  
1.1867  
0.9774  
0.9331

Scheme 2, 4m

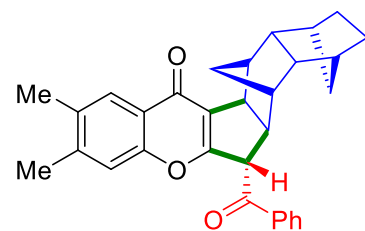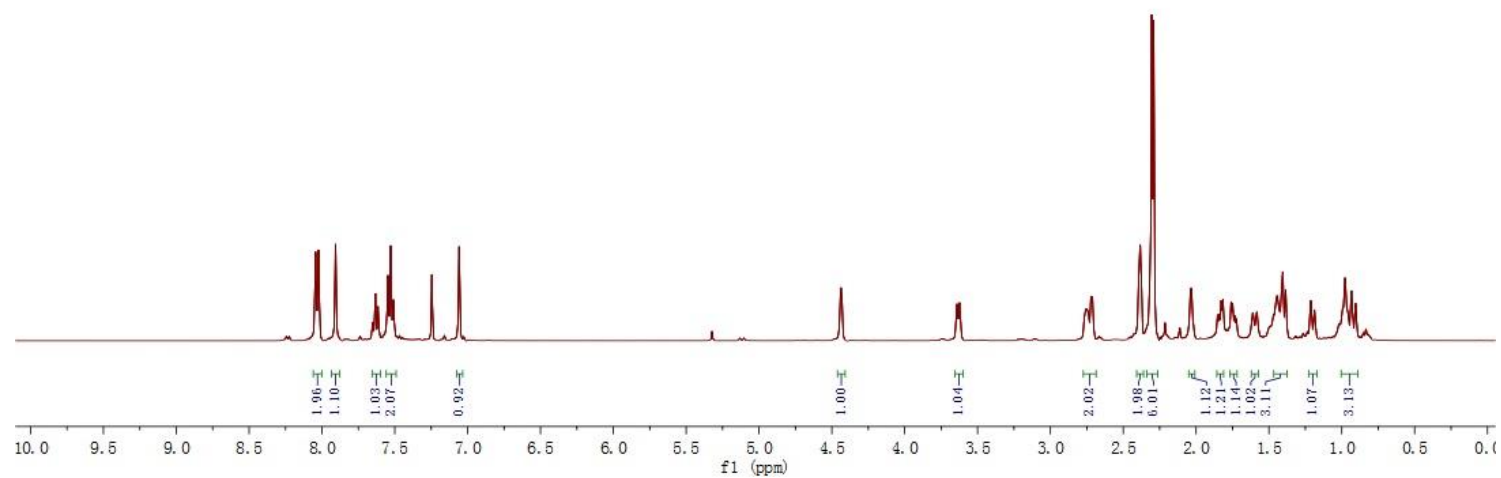

vsy-214-C

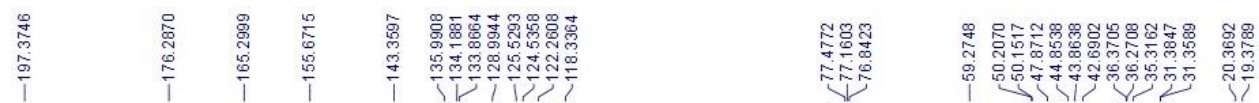

Scheme 2, 4m

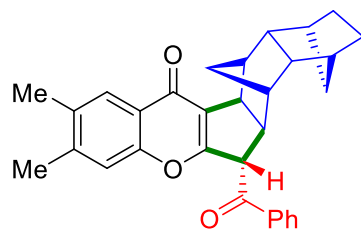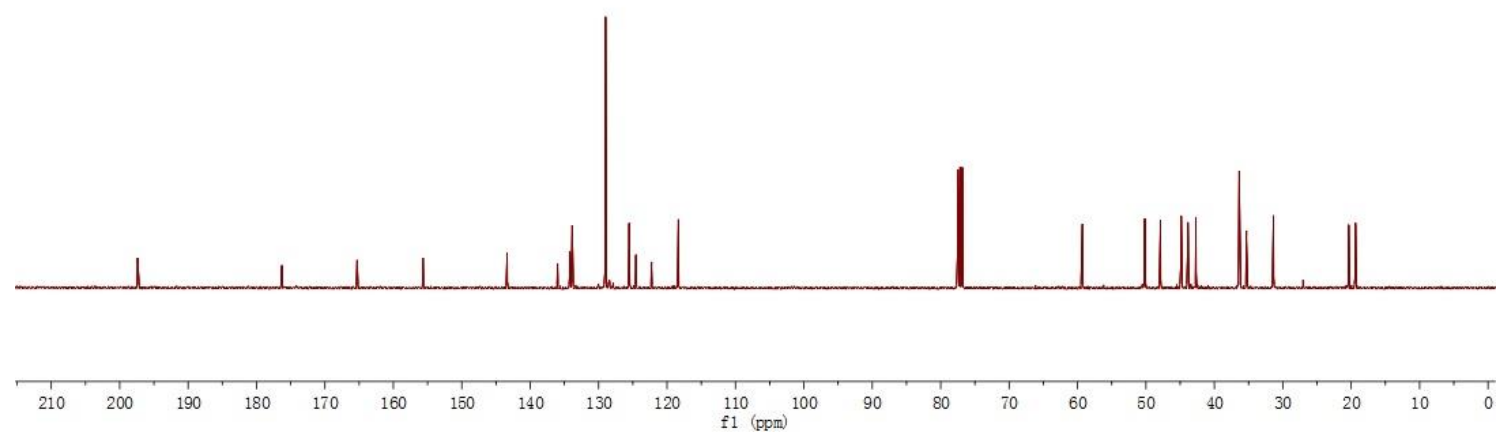

vsy-219-H

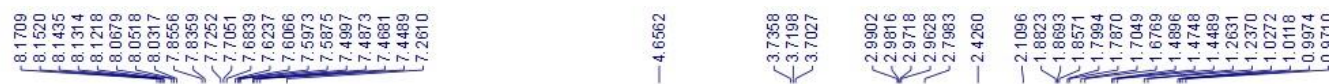

Scheme 2, 4n

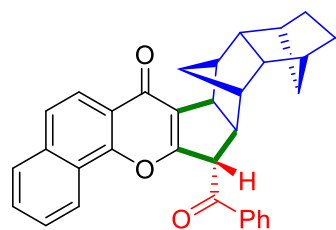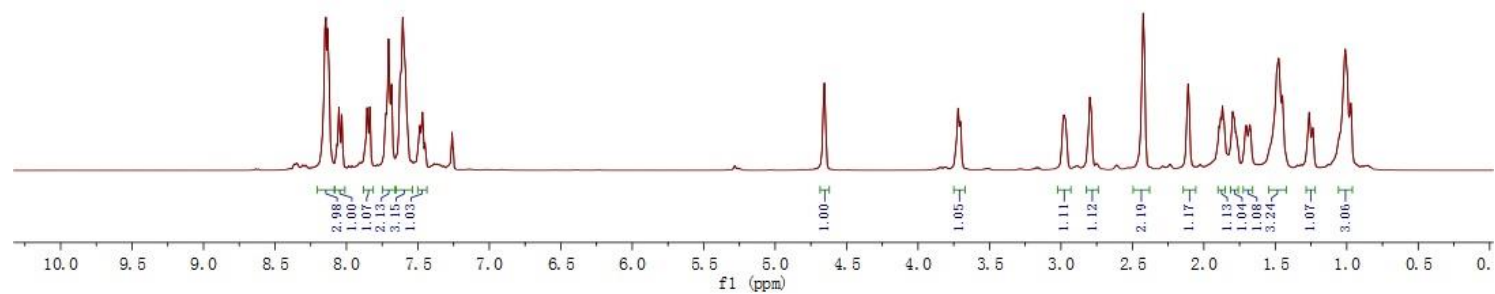

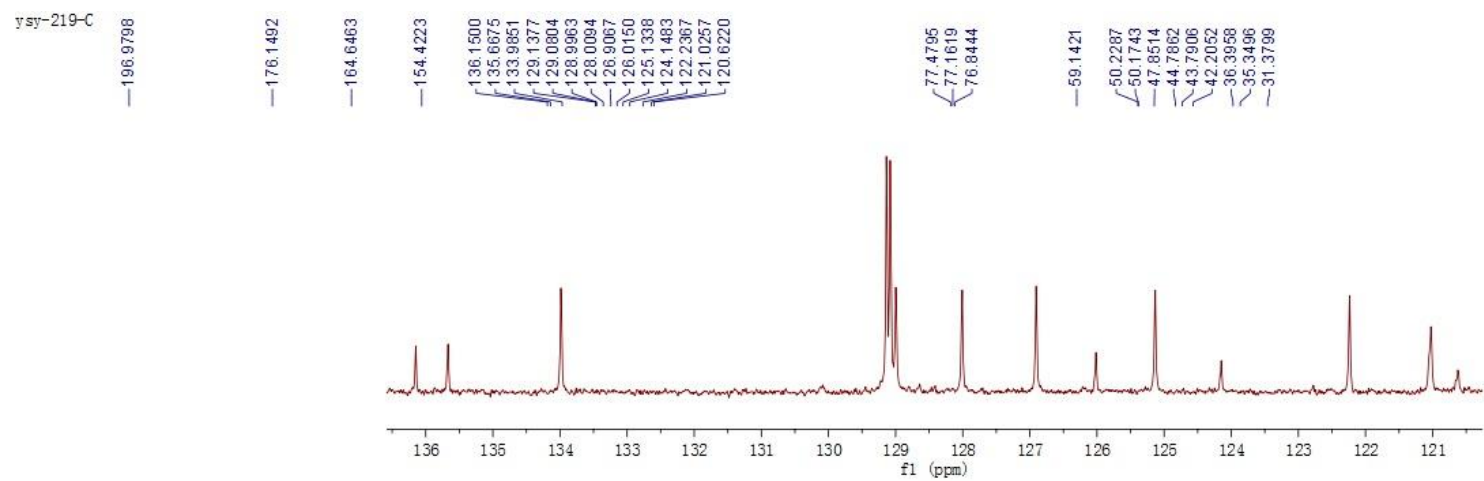

Scheme 2, 4n

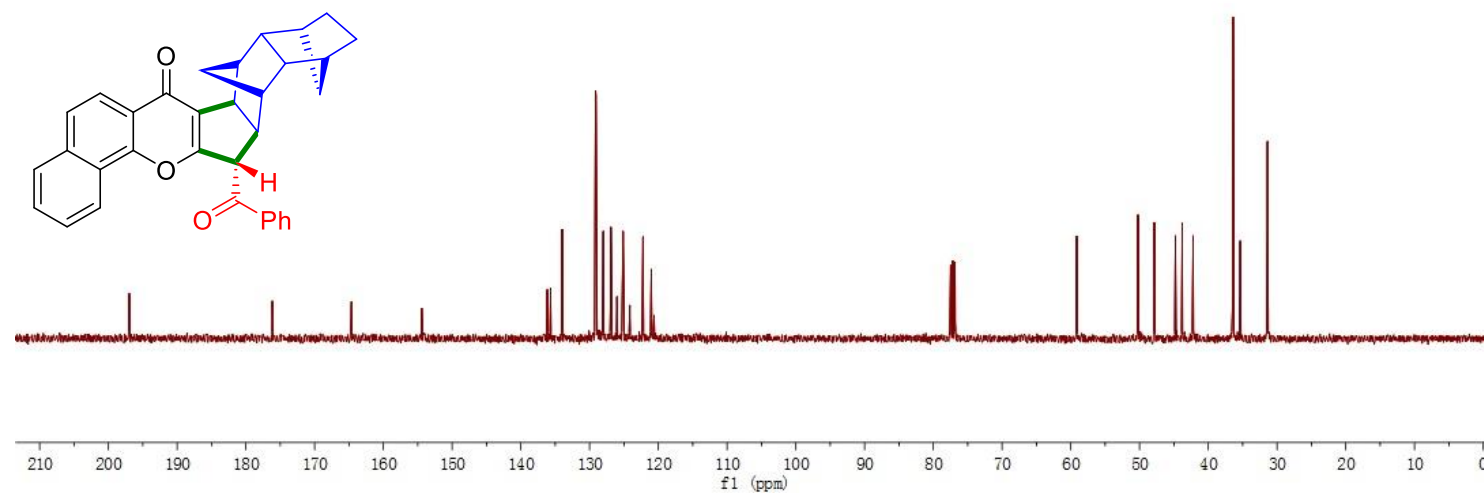



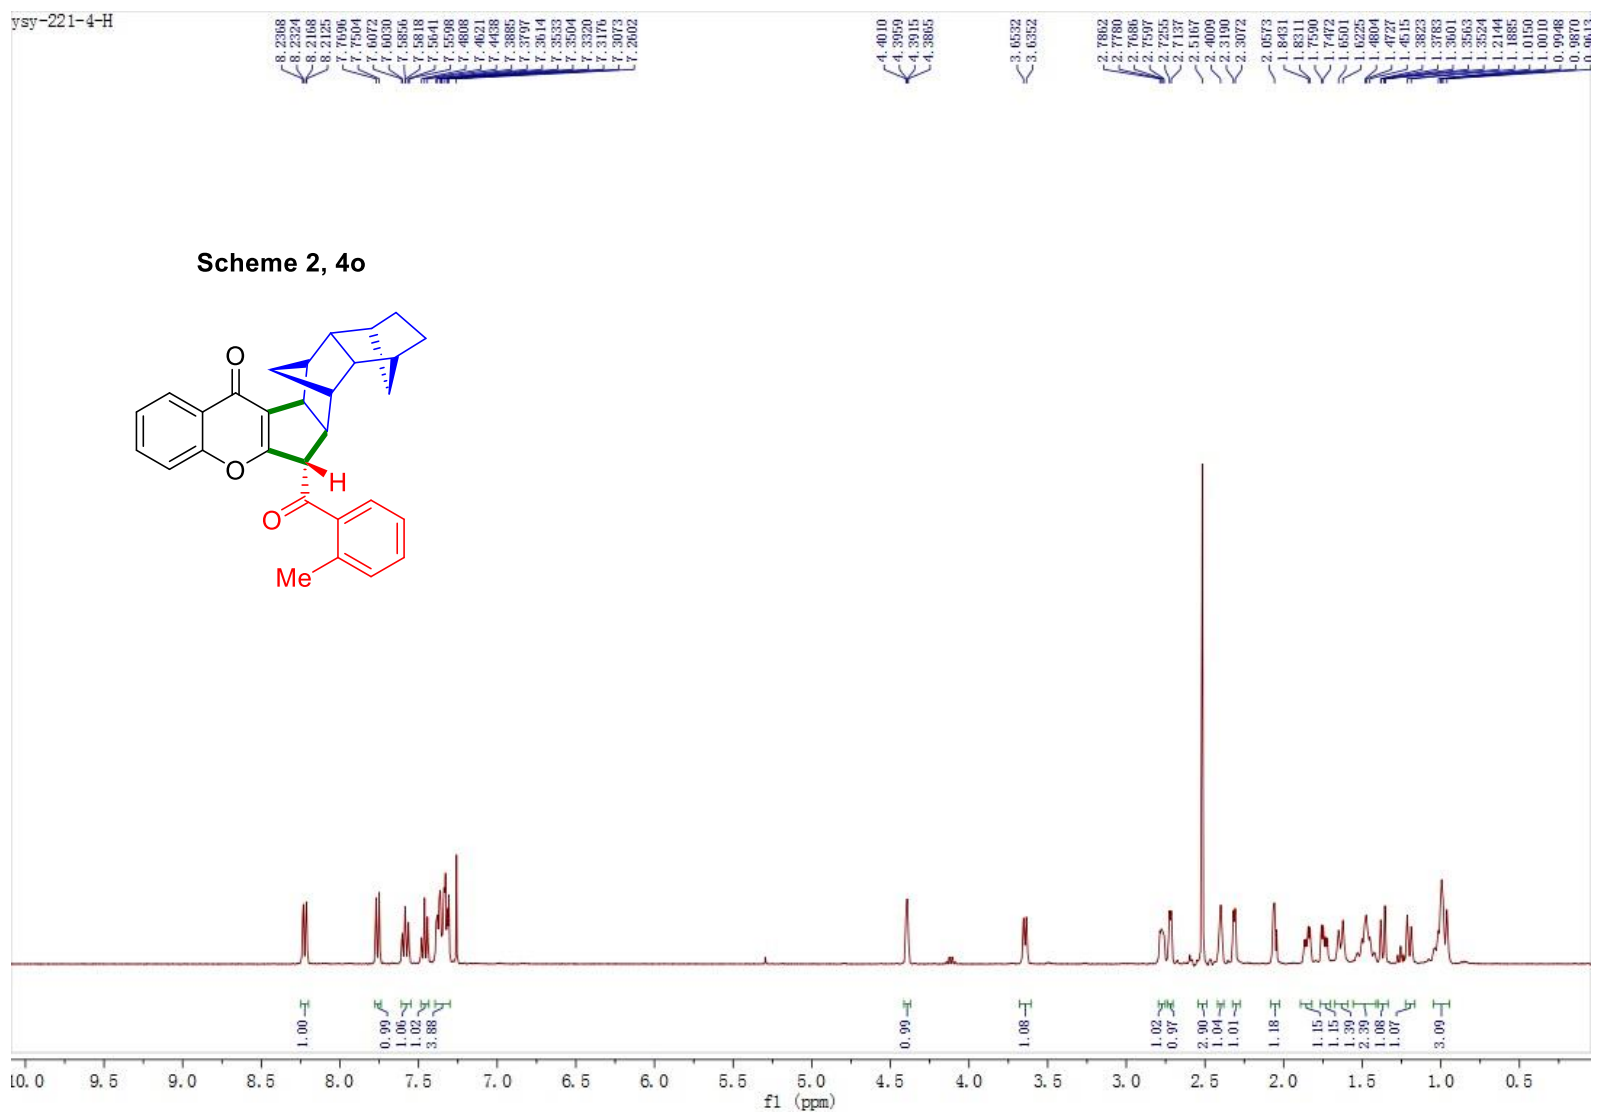

ysy-221-4-C

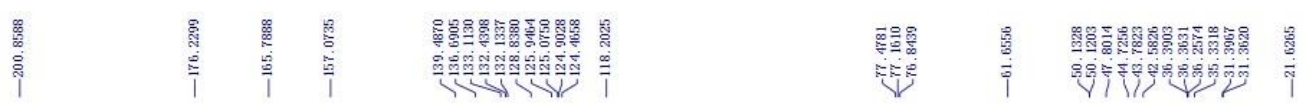

Scheme 2, 4o

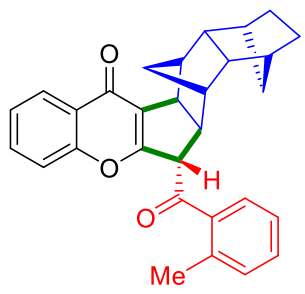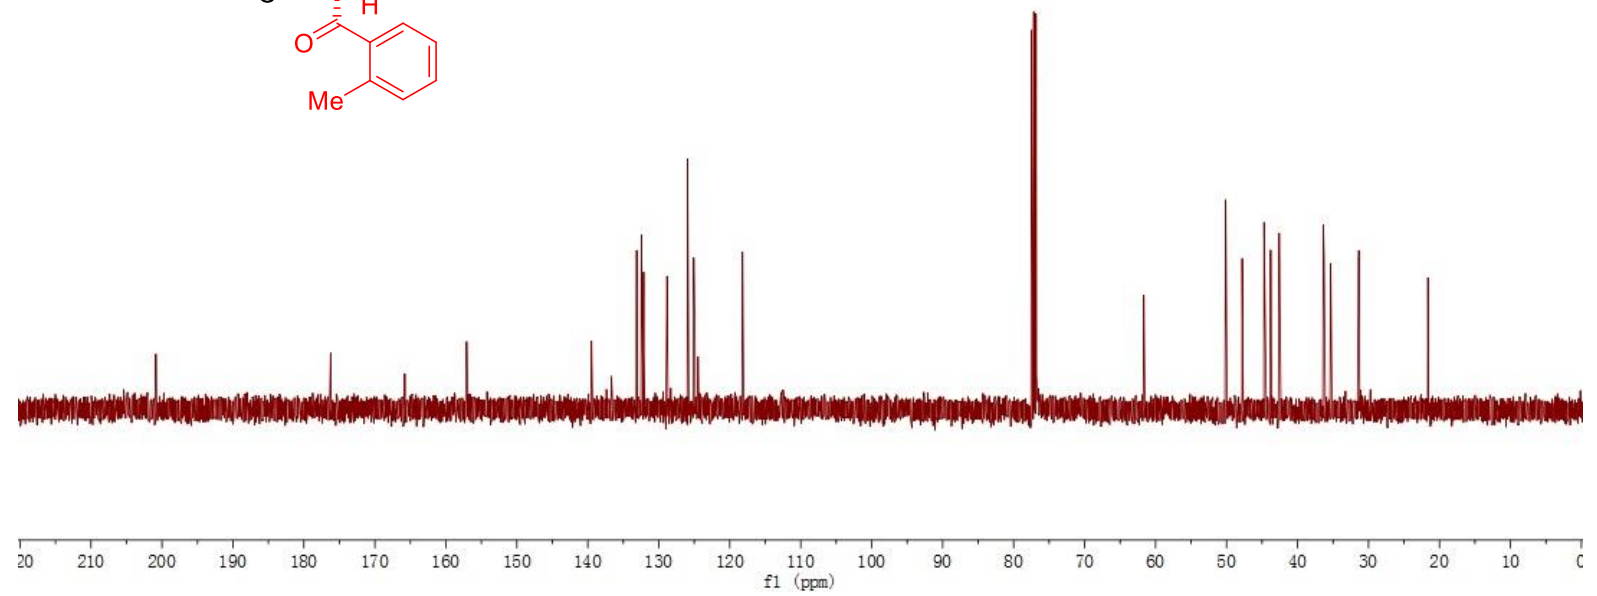

vsy-225-H

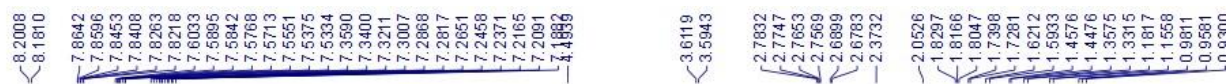

Scheme 2, 4p

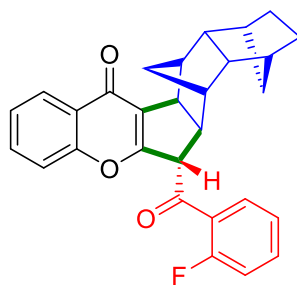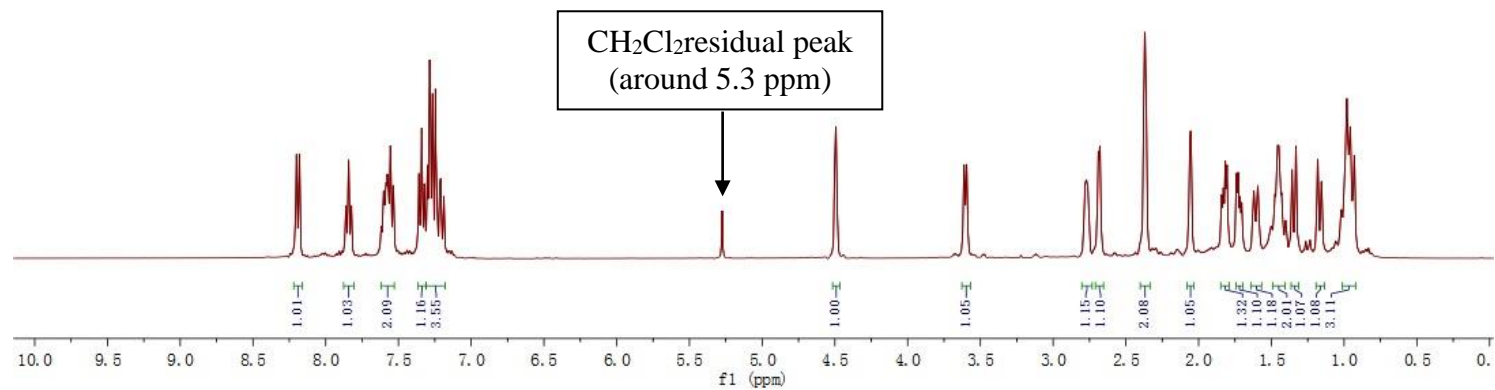

vsy-225-  
196.2454  
196.2048

176.2621

165.5060  
163.0702  
160.5347  
157.0756

135.4127  
135.3221  
133.0882  
131.4387  
131.4150  
125.9319  
118.0274  
117.0422  
116.8072

77.4773  
77.1603  
76.8424

62.6179  
62.5500

50.1730  
50.1399  
47.7522  
47.7276  
44.7817  
43.6278  
42.3891  
36.3732  
36.3569  
36.1966  
35.3298  
31.4097  
31.3689

Scheme 2, 4p

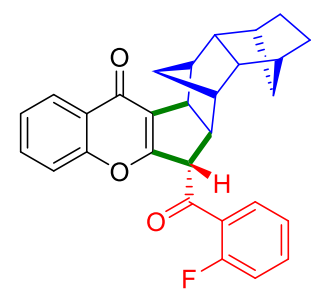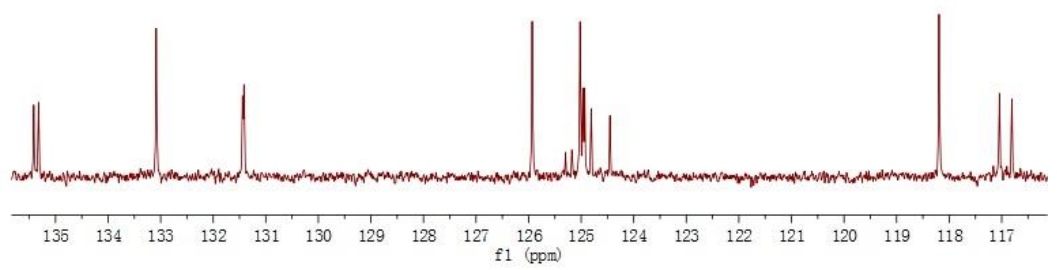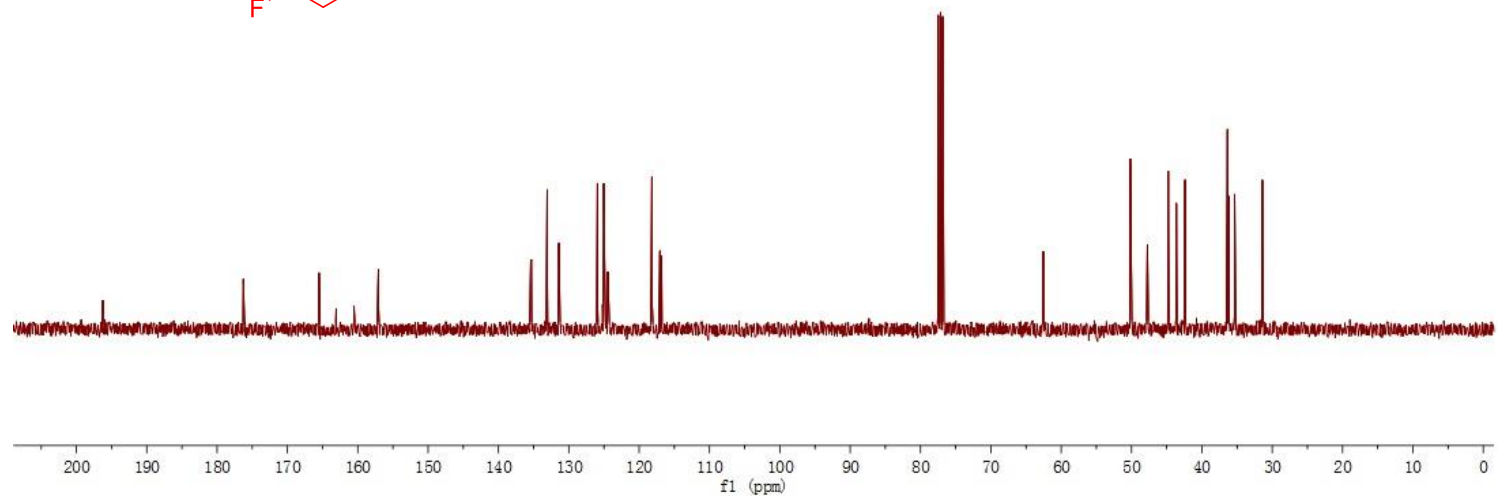

ysy-223-H

8.2394  
8.2349  
8.2194  
8.2154  
7.6416  
7.6226  
7.5946  
7.5713  
7.5555  
7.5515  
7.4793  
7.4593  
7.4396  
7.3828  
7.3639  
7.3454  
7.3340  
7.3131  
7.2598  
7.2104  
7.2041  
7.1899  
7.1835

— 4.630

3.8816  
3.6714  
3.6535

2.7710  
2.7635  
2.7480  
2.7381

2.4373  
2.4259

2.0610  
1.8546  
1.8428  
1.7895  
1.7776  
1.7643  
1.7524  
1.6218  
1.5937  
1.4678  
1.4393  
1.4130  
1.2454  
1.2191  
1.0006  
0.9646  
0.9372

Scheme 2, 4q

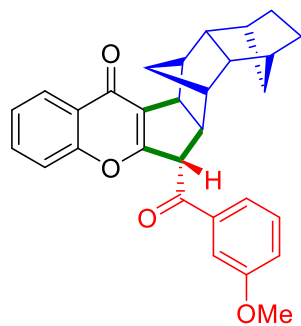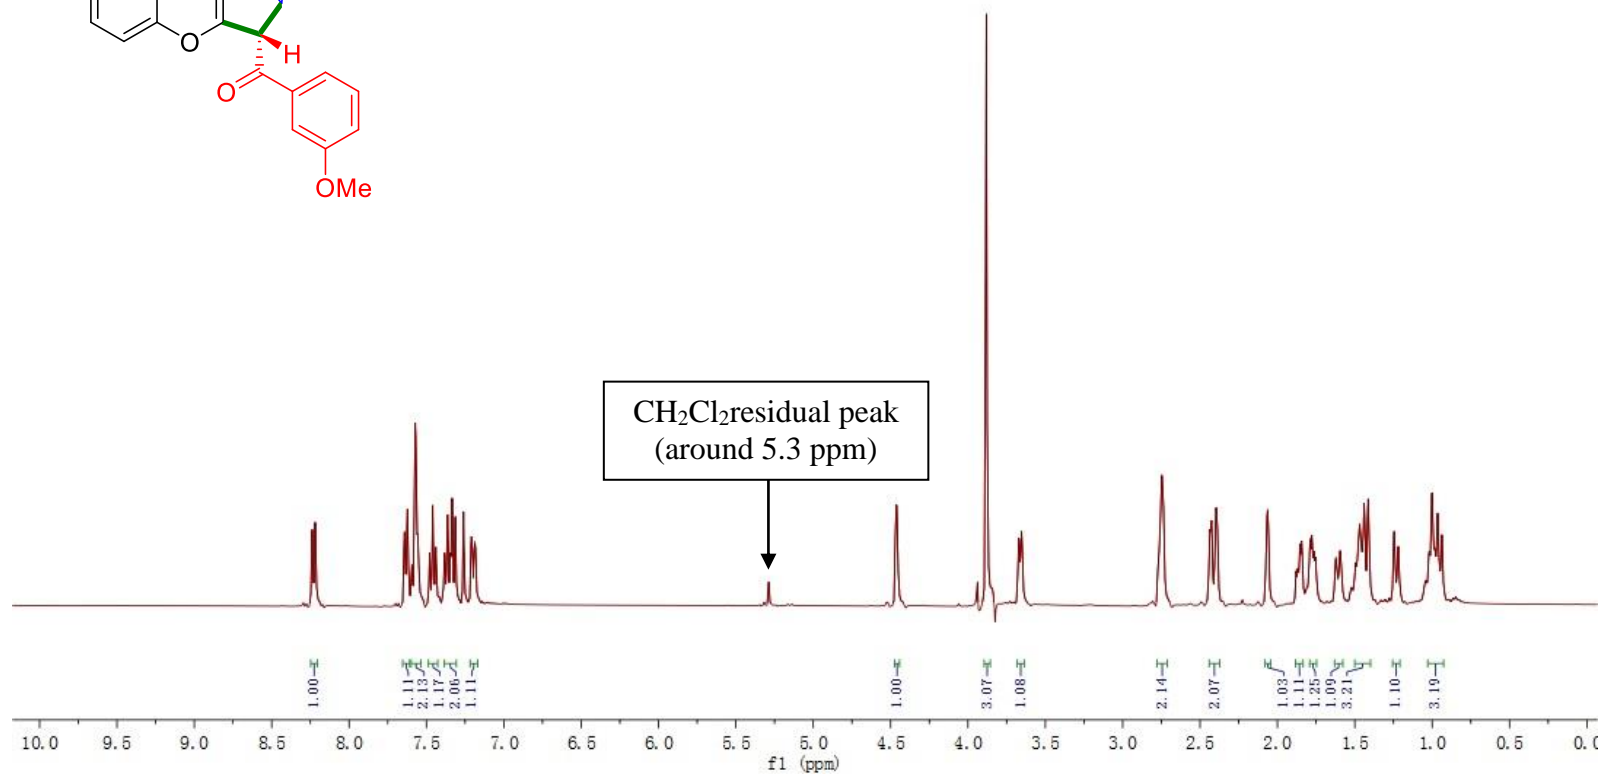

ysy-223-C

197.1176

176.1773

165.7408

160.1816

157.1137

137.2111

133.0840

129.9687

125.9268

125.0453

124.9238

124.4754

121.5153

120.5186

118.2334

113.1755

77.4791

77.1608

76.8421

59.3145

55.6410

50.1757

50.1002

47.8569

43.8181

42.9885

36.2640

35.3211

31.3712

31.3496

Scheme 2, 4q

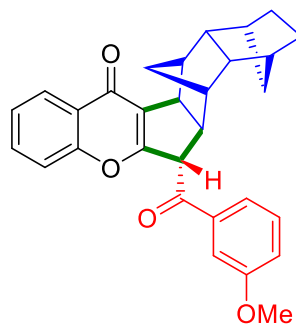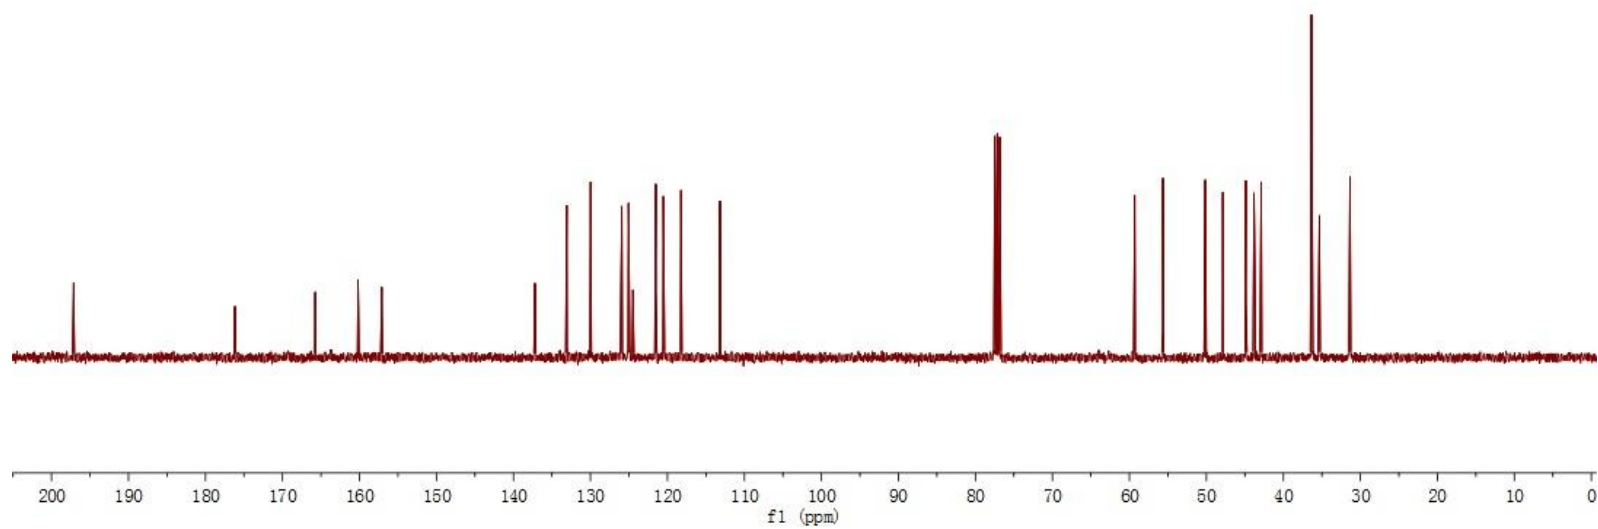

lmz-3-H

8.2270  
8.2071  
7.8478  
7.8283  
7.7503  
7.7270  
7.6003  
7.5968  
7.5824  
7.5793  
7.5759  
7.5684  
7.5561  
7.5482  
7.5151  
7.3836  
7.3640  
7.3231  
7.3021  
7.2999

4.4428  
4.4357  
4.4290

3.6685  
3.6507

2.7749  
2.7660  
2.7573  
2.7453  
2.7323  
2.4161  
2.4038  
2.3947  
2.3859  
2.0599  
1.8803  
1.8686  
1.8554  
1.8435  
1.7929  
1.7812  
1.7677  
1.7560  
1.6131  
1.5857  
1.4946  
1.4705  
1.4445  
1.4220  
1.3823  
1.3523  
1.2255  
1.0428  
1.0353  
1.0194  
1.0014  
0.9727  
0.9452

Scheme 2, 4r

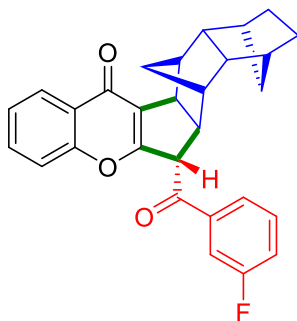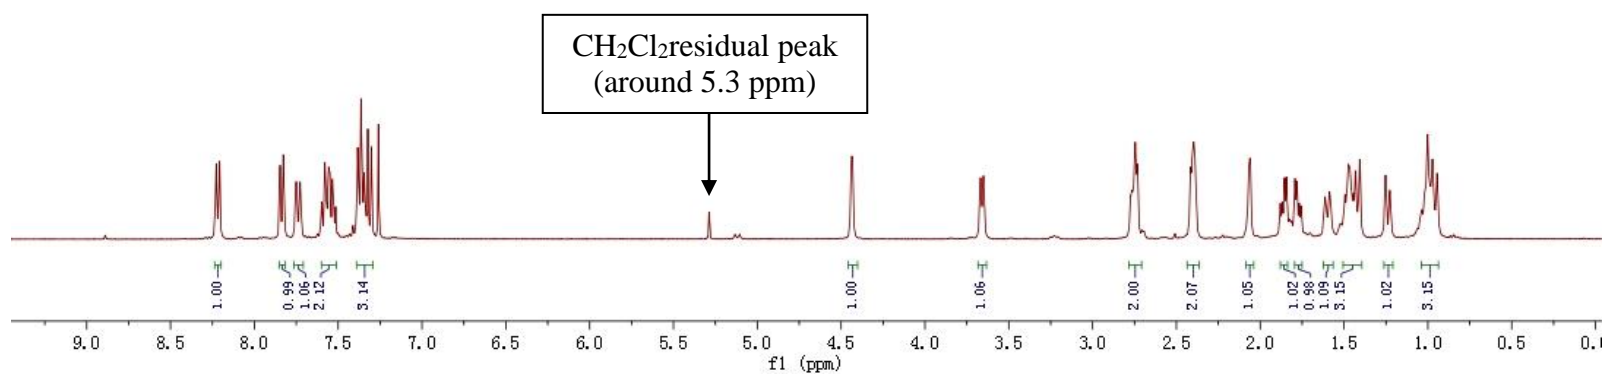

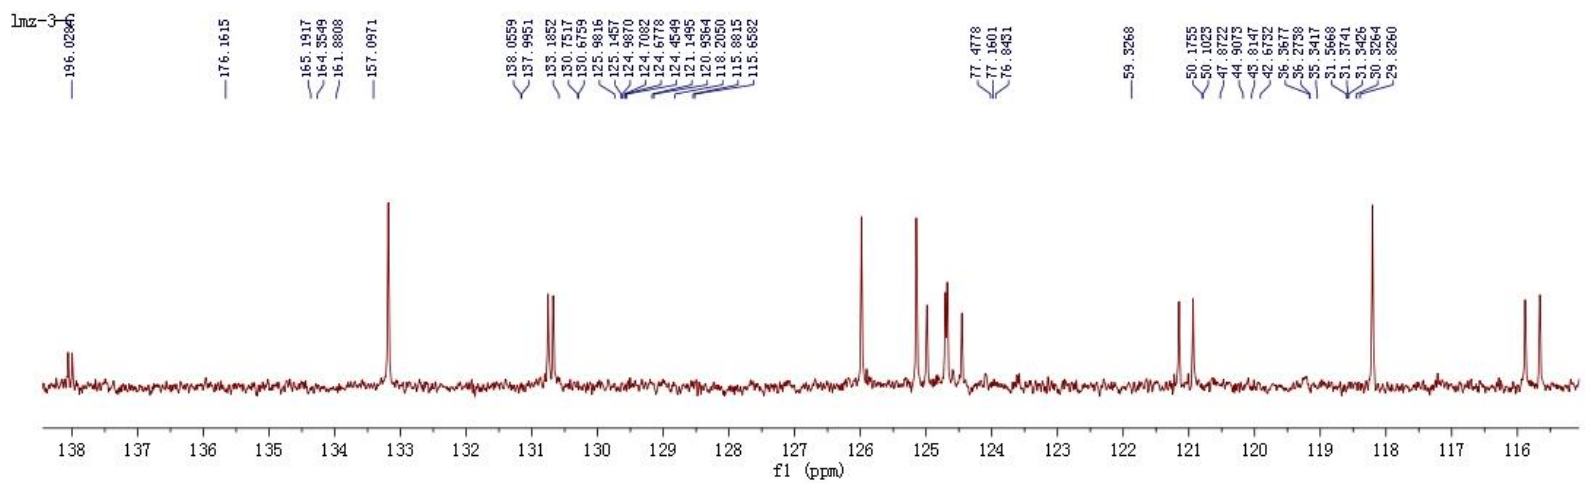

Scheme 2, 4r

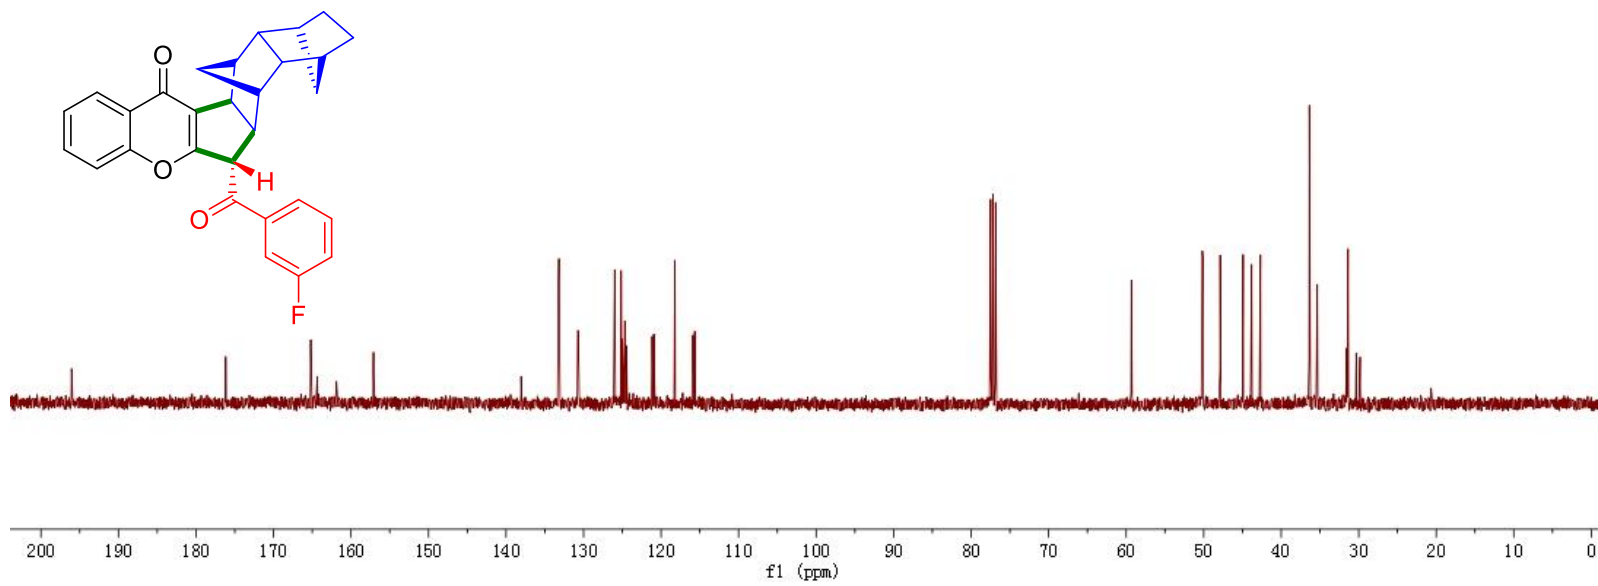



vsy-228-H

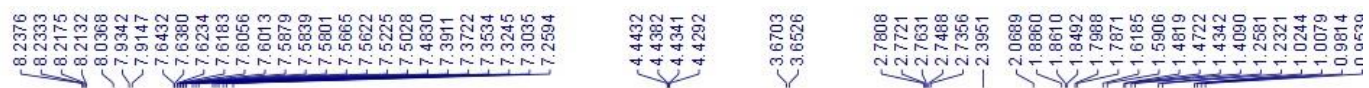

Scheme 2, 4s

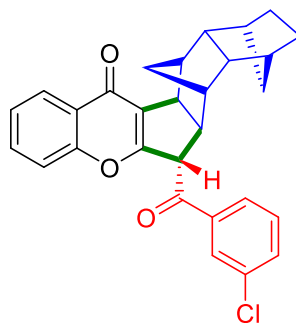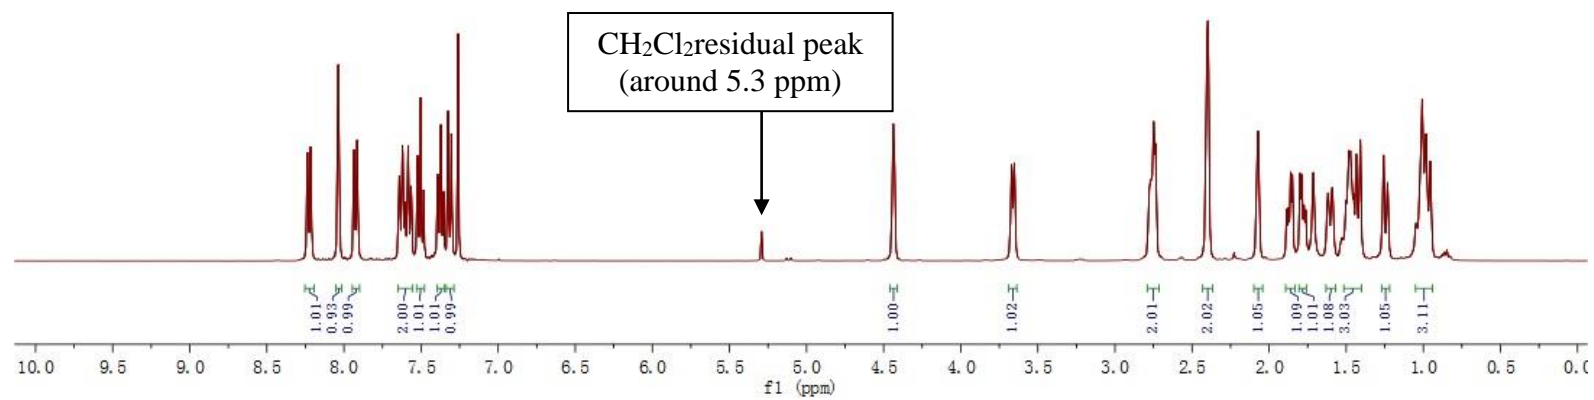

ysy-228-C

—196.0041

—176.1671

—165.1408

—157.0654

137.4641

135.4713

133.8859

133.2033

130.3336

129.1395

127.0002

125.9651

125.1527

124.9727

124.4115

—118.1894

77.4778

77.1599

76.8417

—59.2143

50.1594

50.0804

47.8463

44.8771

43.7929

36.8559

36.2783

35.3381

31.3701

31.3356

Scheme 2, 4s

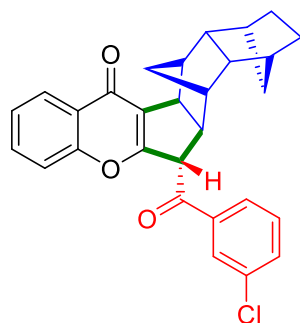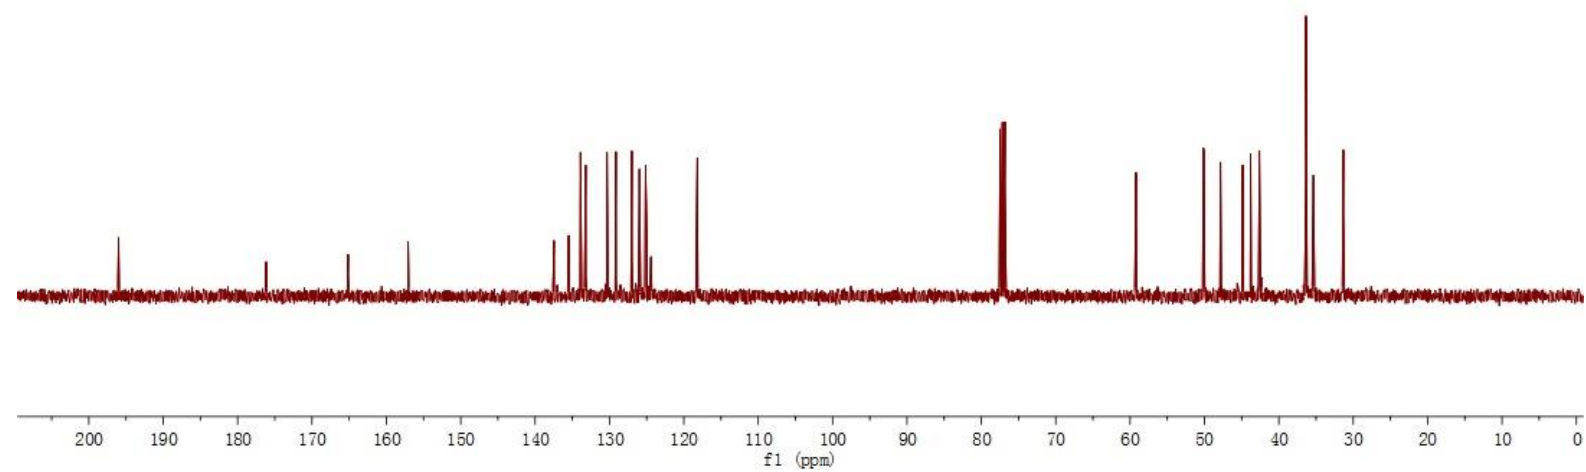

ysy-222-H

8.2335  
8.2294  
8.2134  
8.2094  
7.9619  
7.9421  
7.5817  
7.5776  
7.5598  
7.5426  
7.5384  
7.3701  
7.3486  
7.3279  
7.3207  
7.2996  
7.2594

4.4641

3.6648  
3.6470

2.7707  
2.7615  
2.7443  
2.7322

2.4548  
2.4116

2.0580

2.0489

1.8597

1.8461

1.8342

1.7783

1.7666

1.5965

1.4001

1.4346

1.4089

1.2358

1.2098

0.9958

0.9904

0.9532

Scheme 2, 4t

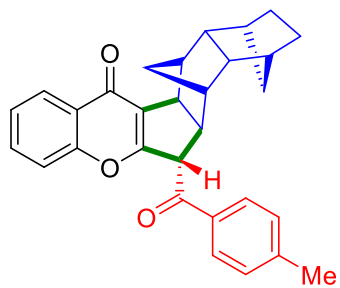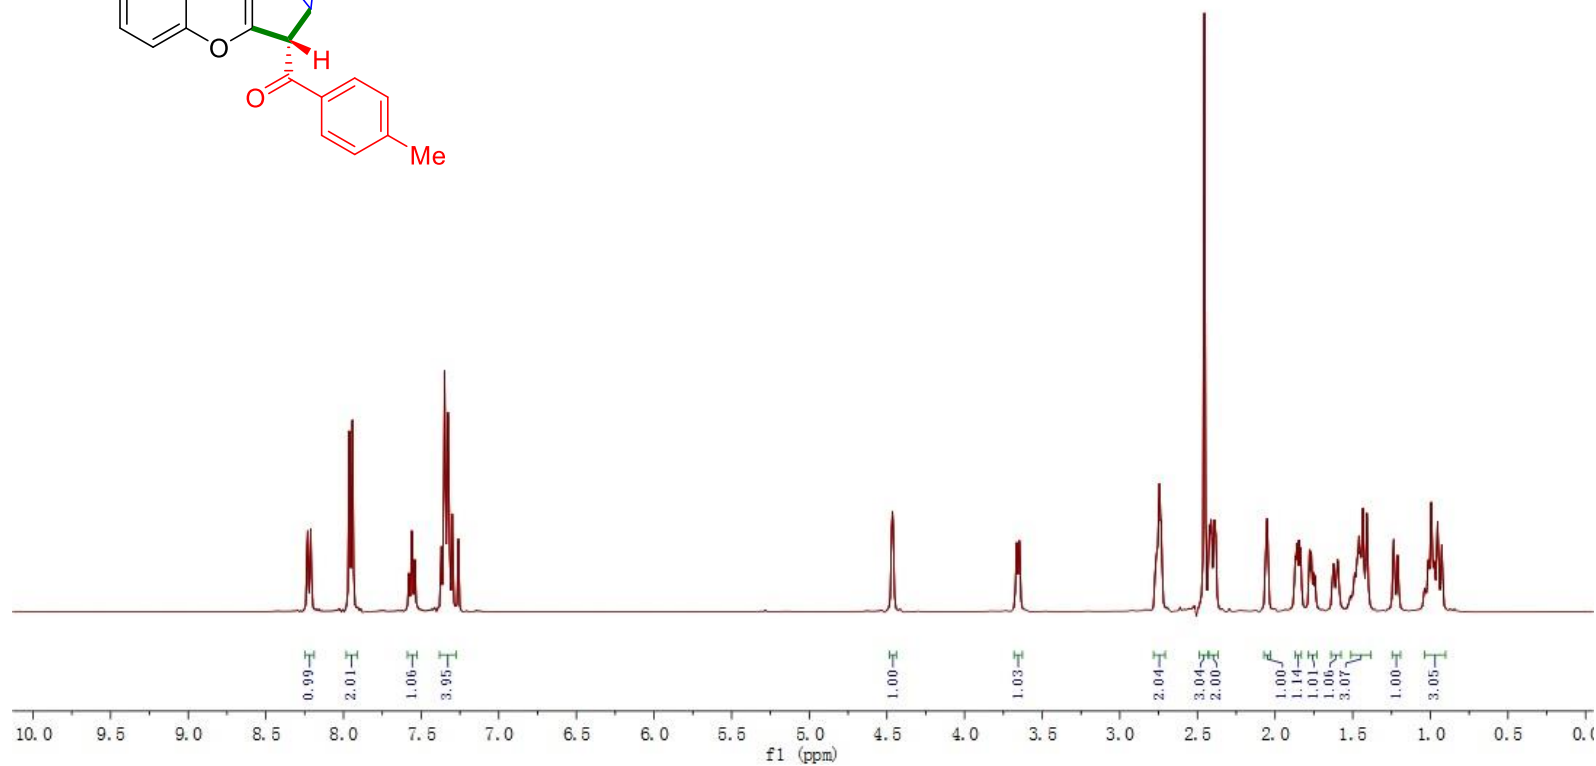

vsy-222-C

—196.8480

—176.1729

—165.9532

—157.0959

—144.9582

133.3512

133.0184

129.7141

129.1222

125.8840

124.9890

124.8555

124.4670

118.2238

77.4778

77.1600

76.8427

—59.0987

50.1635

50.1013

47.8127

44.8293

43.8096

42.7844

36.3445

36.2652

35.3002

31.3453

—21.8660

Scheme 2, 4t

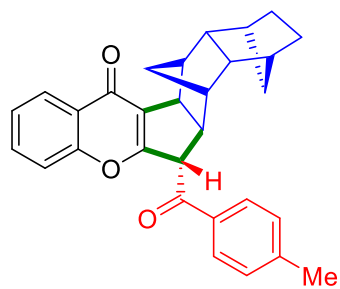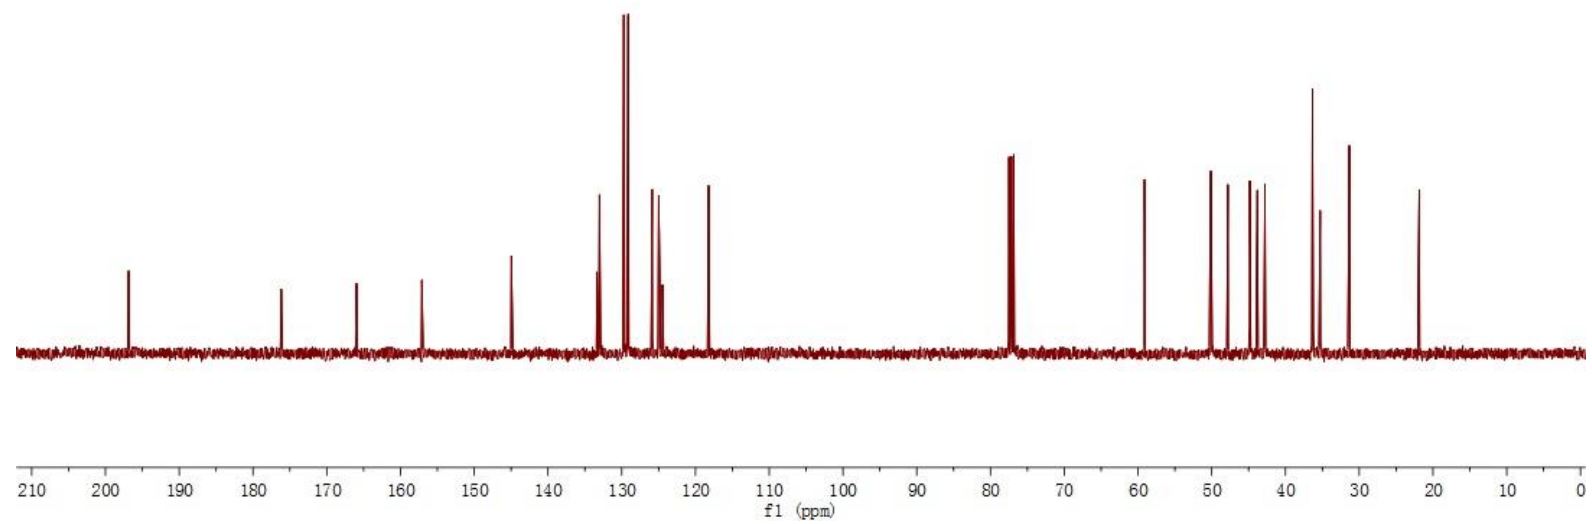

vsy-224-H

8.2240  
8.2197  
8.2041  
8.1999  
8.0407  
8.0189  
7.5735  
7.5693  
7.5560  
7.5521  
7.5482  
7.5346  
7.5303  
7.3608  
7.3419  
7.3228  
7.3157  
7.2948  
7.2593  
7.0166  
6.9948

4.4467  
4.4420  
4.4377  
4.4326

3.8972  
3.6558  
3.6381

2.7715  
2.7626  
2.7536  
2.7448  
2.7338  
2.7222

2.3957  
2.3816

2.0610  
2.0521

1.8611  
1.8360  
1.8242  
1.7697  
1.7580  
1.6270  
1.5991  
1.4532  
1.4247  
1.3984  
1.2244  
1.1986  
0.9856  
0.9488

Scheme 2, 4u

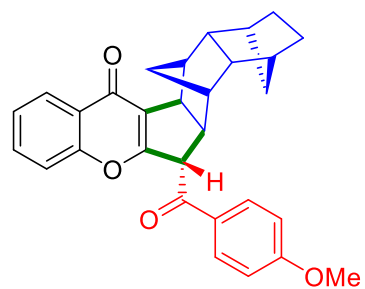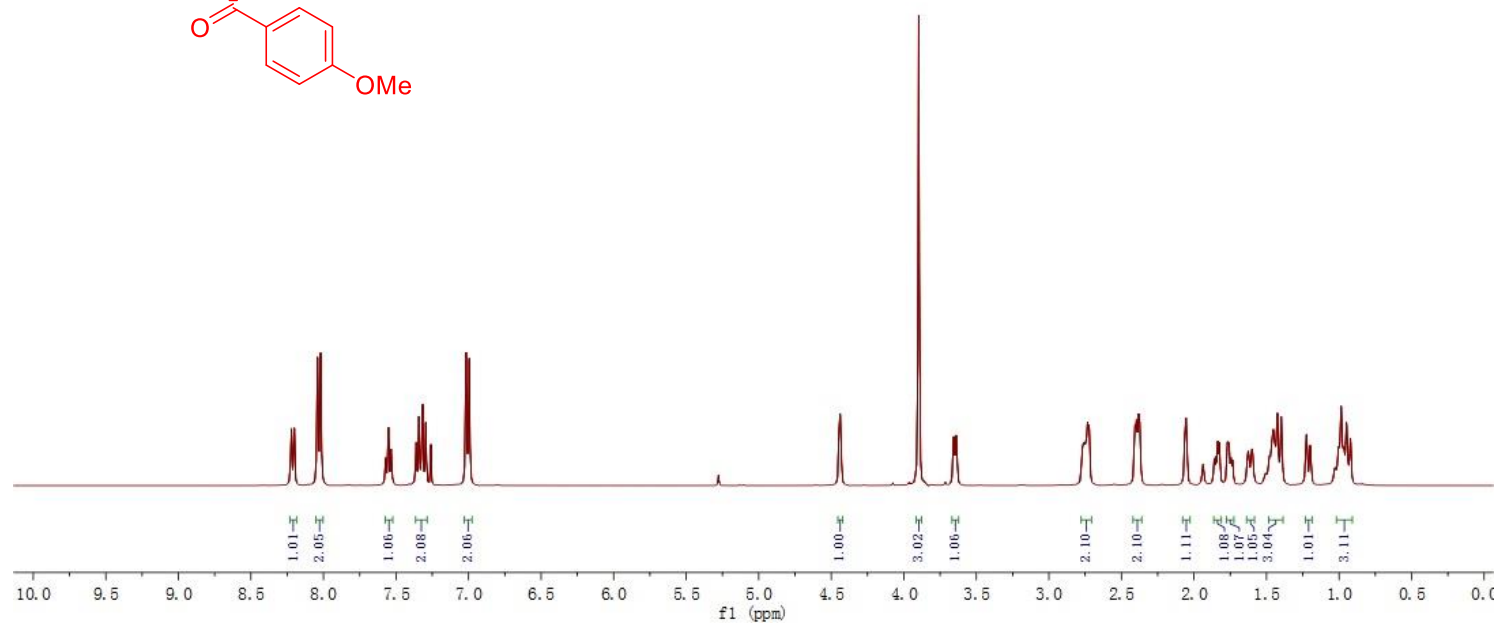

vsy-224-C

195.6935

176.1417

166.0946

164.1785

157.0314

132.9772

131.3054

128.7561

125.7970

124.9312

124.7529

124.3860

118.1753

114.2477

114.1066

77.4804

77.1631

76.8450

58.8601

55.6635

50.1156

50.0494

44.7534

43.7560

36.2514

36.2277

35.2578

31.3015

Scheme 2, 4u

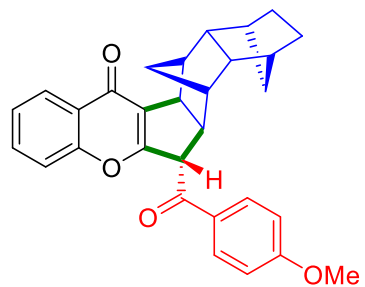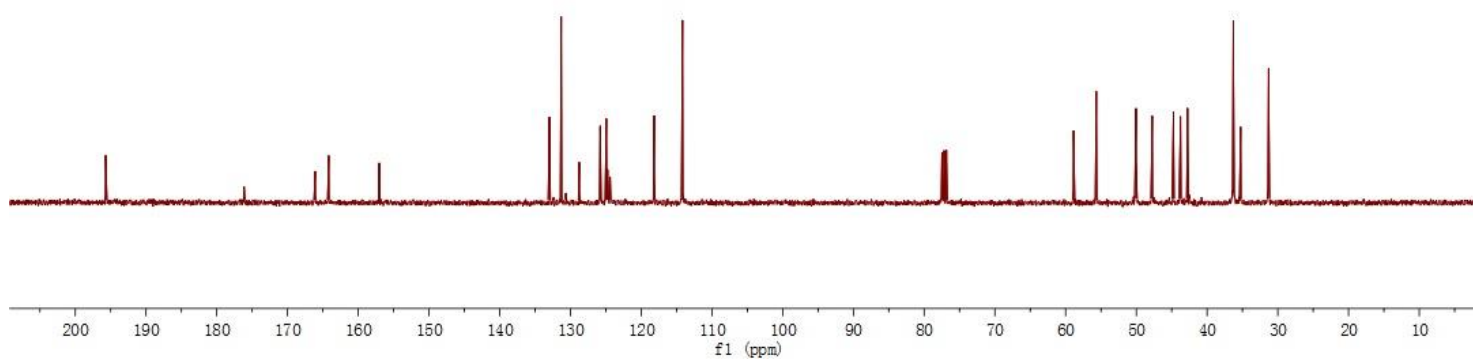

lmz-4-H

8.2557  
8.2359  
8.1497  
8.1294  
7.7925  
7.7722  
7.6879  
7.6690  
7.6059  
7.5867  
7.5671  
7.5270  
7.4845  
7.4537  
7.4376  
7.4341  
7.3981  
7.3792  
7.3606  
7.3507  
7.3296  
7.2602

4.5245

3.7051  
3.6875

2.8317  
2.8227  
2.8127  
2.8045  
2.7724  
2.7609  
2.4731  
2.4617  
2.4206  
2.4115  
2.0878  
2.0890  
1.8765  
1.8647  
1.8429  
1.8015  
1.8117  
1.6295  
1.6254  
1.5924  
1.5094  
1.4985  
1.4910  
1.4810  
1.4704  
1.4456  
1.2739  
1.2481  
1.0342  
1.0144  
1.09951  
1.09835  
1.09557

Scheme 2, 4v

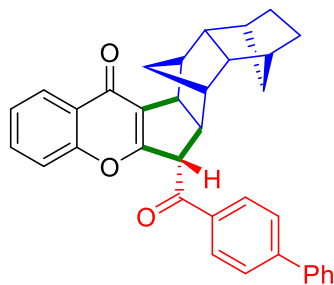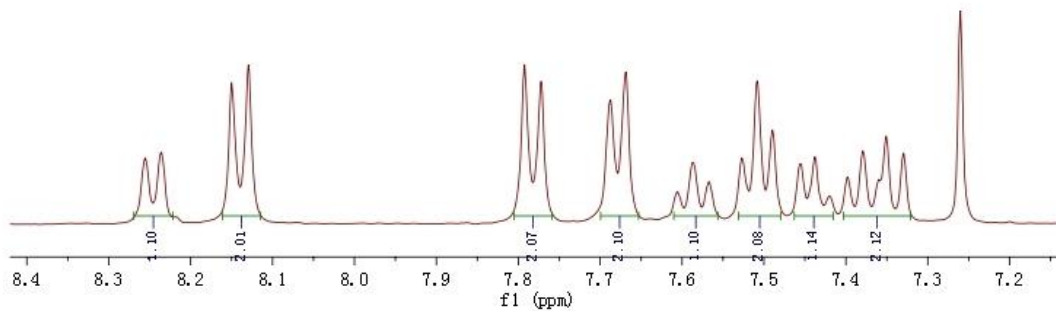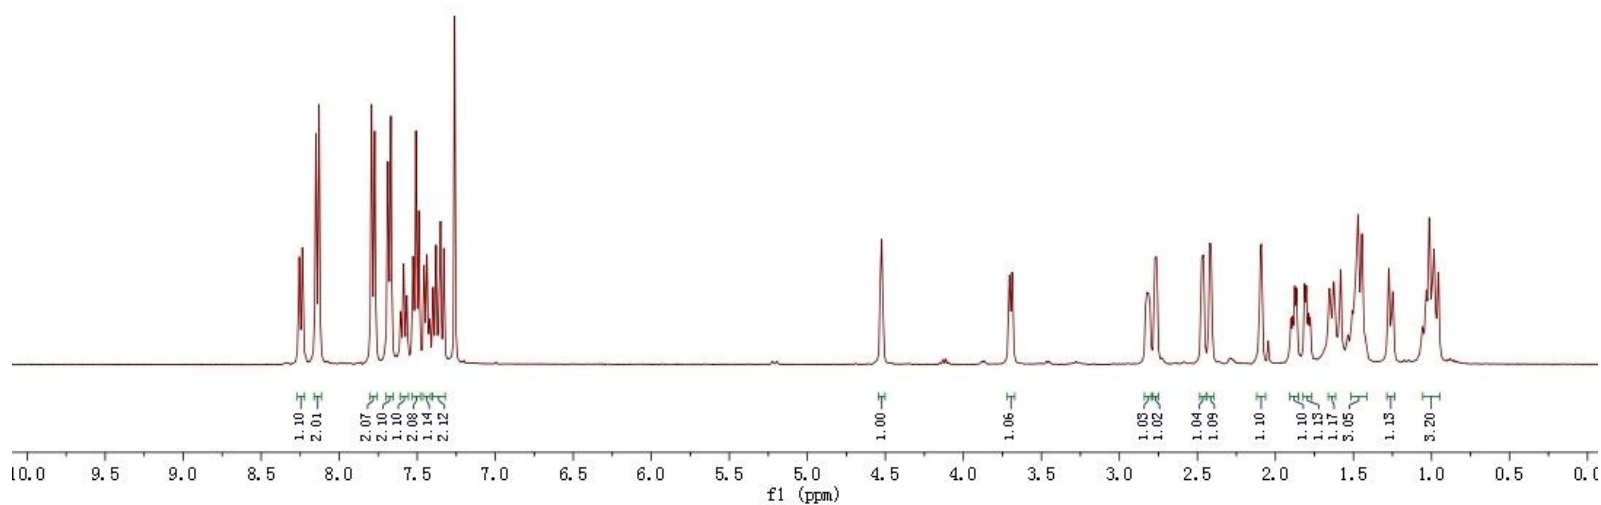

lmz-4-C

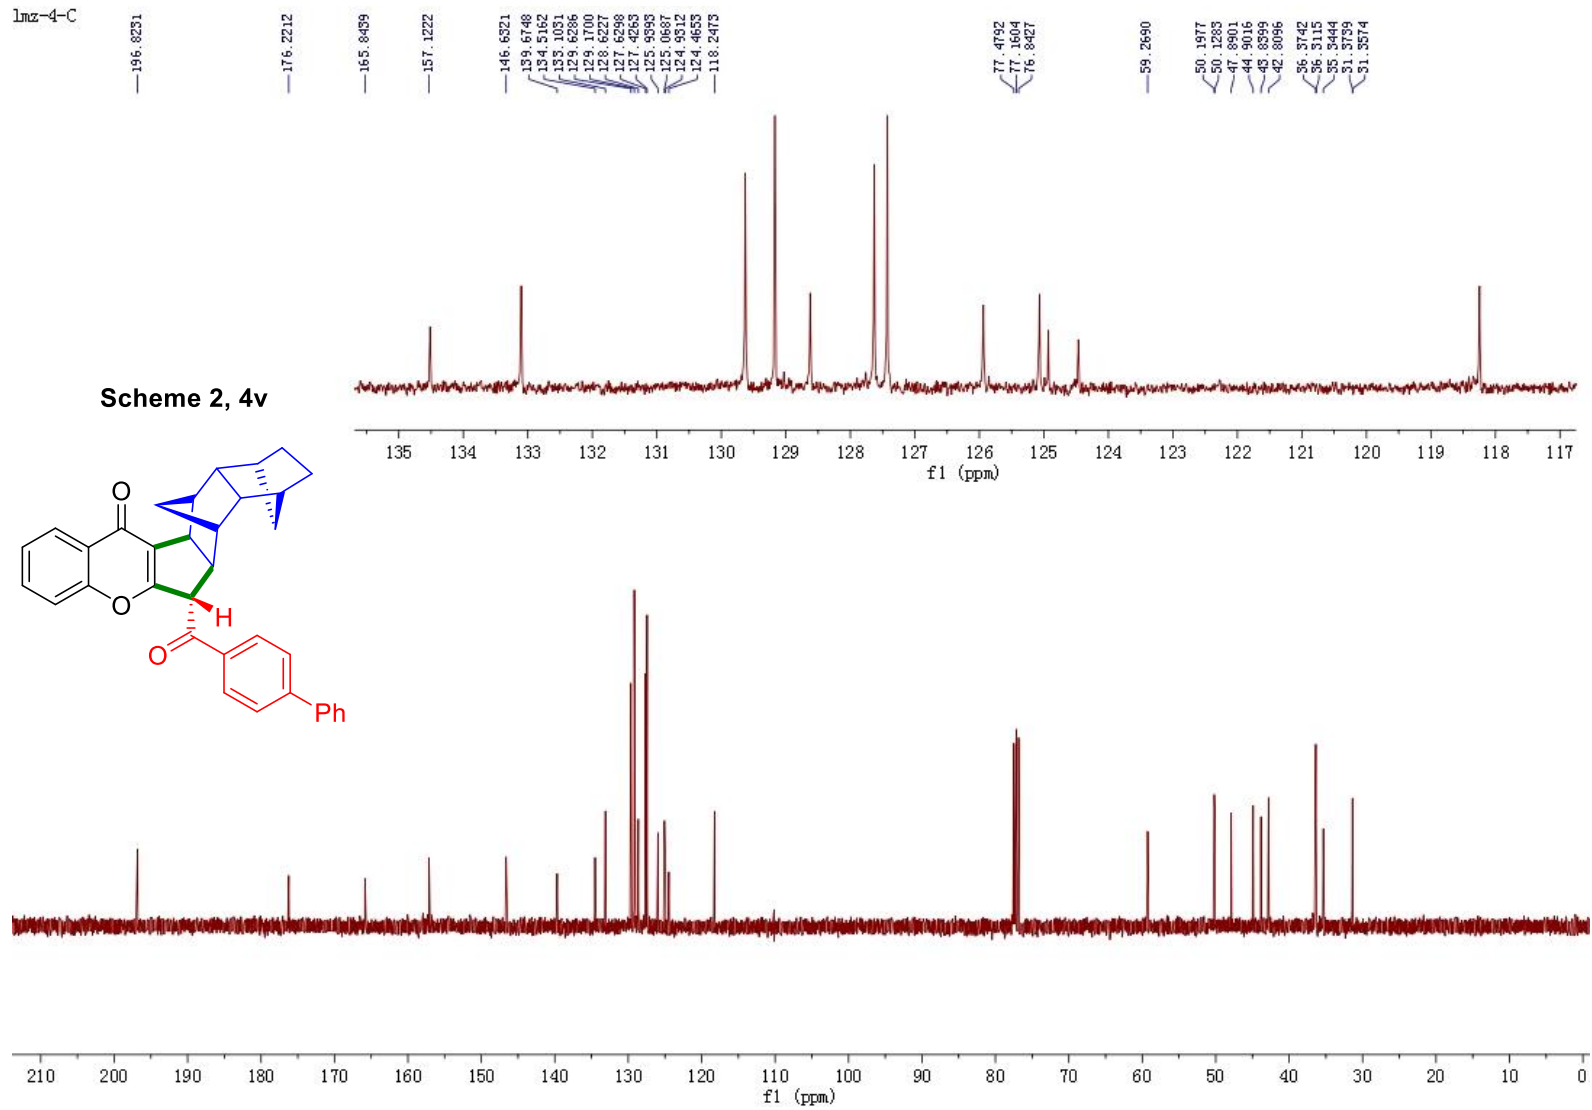



lmz-5-H

8.2295  
8.2102  
8.1075  
8.0941  
8.0854  
8.0735  
7.5714  
7.5571  
7.3792  
7.3606  
7.3414  
7.3165  
7.2952  
7.2607  
7.2428  
7.2296  
7.2217  
7.2007

4.4474

3.6664  
3.6490

2.7763  
2.7652  
2.7443  
2.7309

2.3905

2.0644  
1.8757  
1.8626  
1.8505  
1.8389  
1.7844  
1.726  
1.7092  
1.692  
1.5192  
1.5113  
1.4926  
1.4685  
1.4393  
1.4293  
1.4047  
1.2453  
1.2193  
1.0155  
0.9979  
0.9680  
0.9479

Scheme 2, 4w

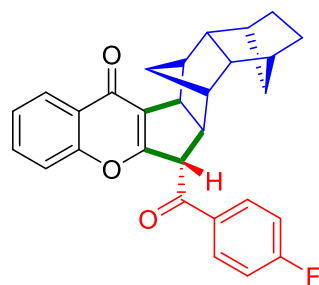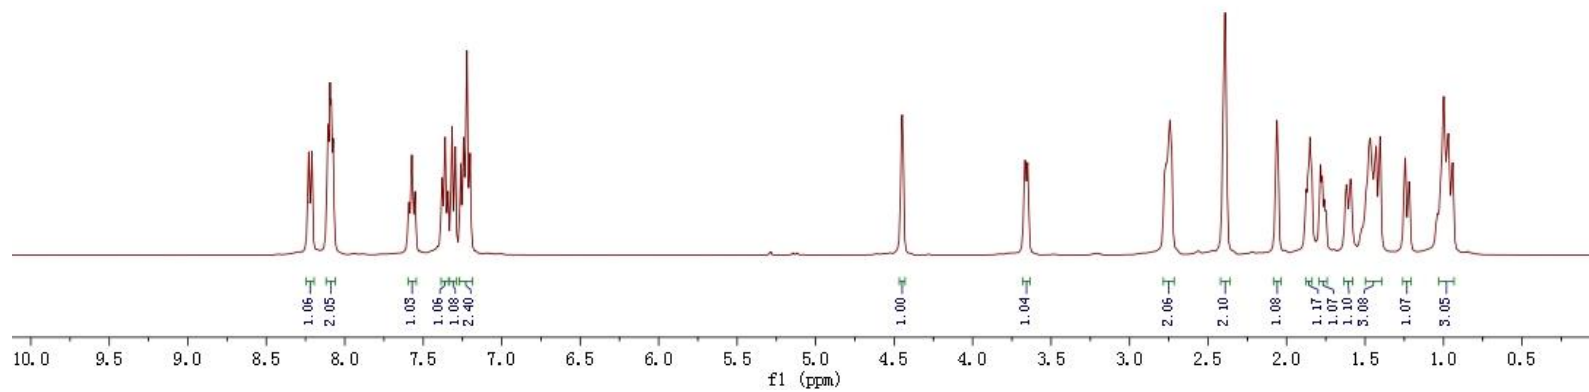

1mz-5-C

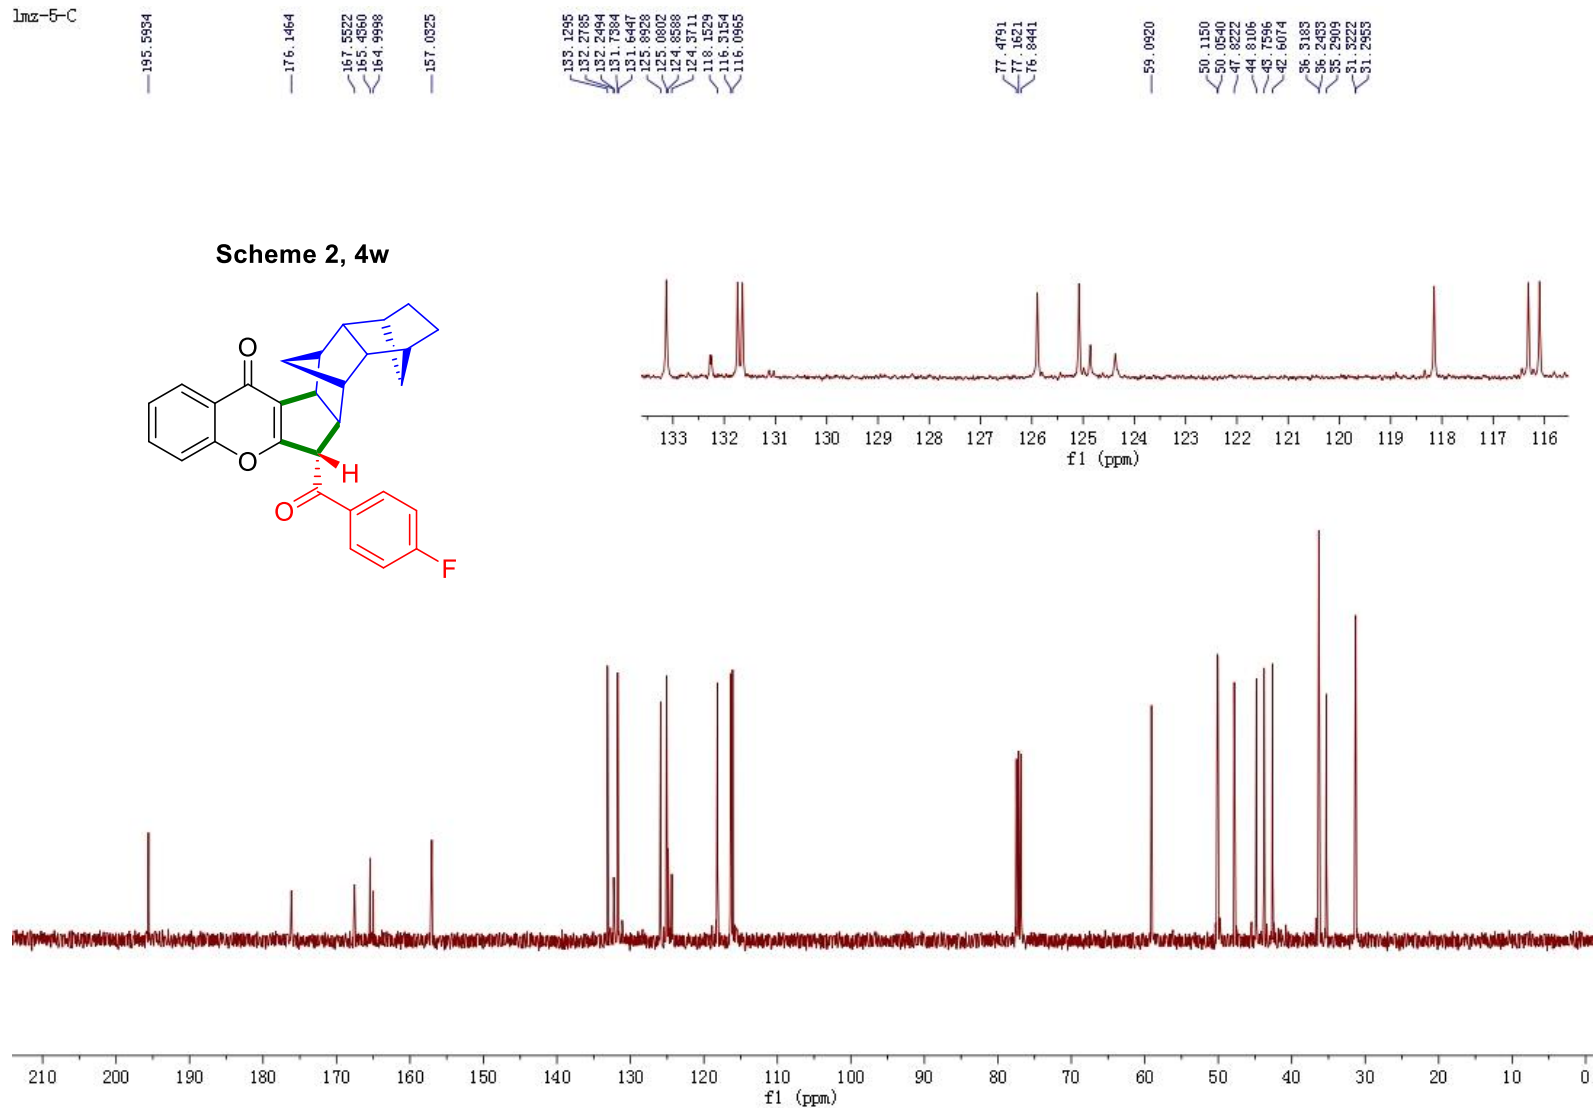

vsy-232-H

8.1842  
8.1795  
8.1639  
8.1593  
8.1367  
8.1166  
7.8461  
7.8259  
7.5620  
7.5774  
7.5601  
7.5429  
7.5383  
7.3616  
7.3426  
7.3232  
7.2770  
7.2558  
7.2459

4.4538  
4.4473  
4.4411

3.6360  
3.6183

2.7475  
2.7370  
2.7282  
2.7075  
2.6968

2.3714  
2.3580

2.0214  
1.8287

1.8170  
1.7671

1.7557  
1.5647

1.5365  
1.4485

1.4379  
1.4028

1.3774  
1.2340

1.2080  
0.9737  
0.9474

Scheme 2, 4x

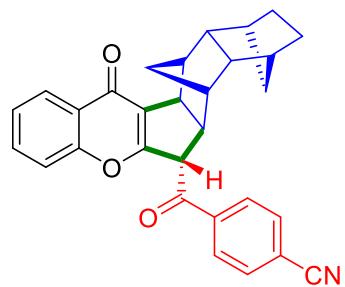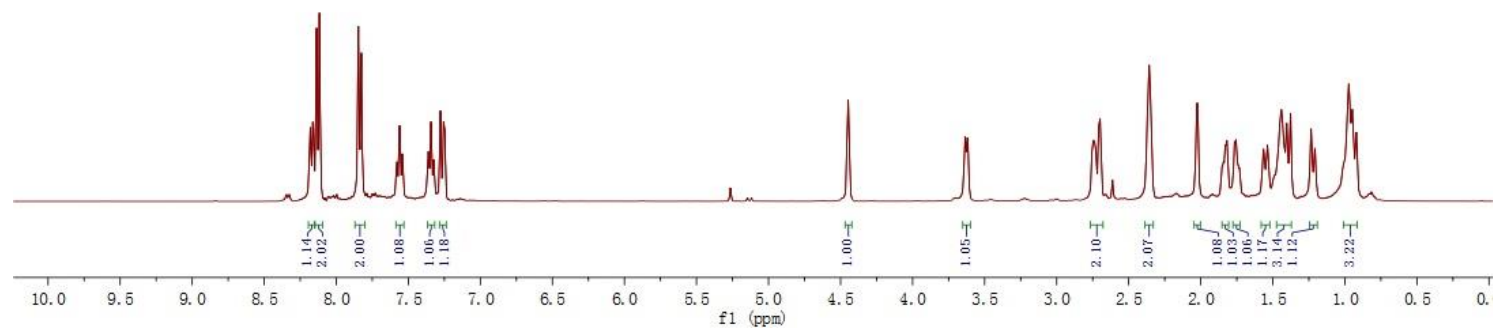

vsy-232-C

- 195.8805
- 176.0411
- 164.6074
- 156.9761
- 138.8028
- 133.2817
- 132.8233
- 129.3385
- 125.9330
- 118.0528
- 117.8088
- 117.1493
- 77.4806
- 77.1620
- 76.8466
- 59.3209
- 50.0595
- 50.0023
- 47.8293
- 44.8605
- 43.7198
- 42.3954
- 36.3053
- 36.2894
- 36.2183
- 35.2871
- 31.2865
- 31.2507

Scheme 2, 4x

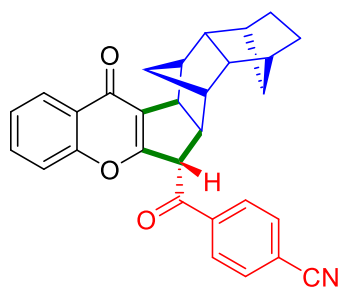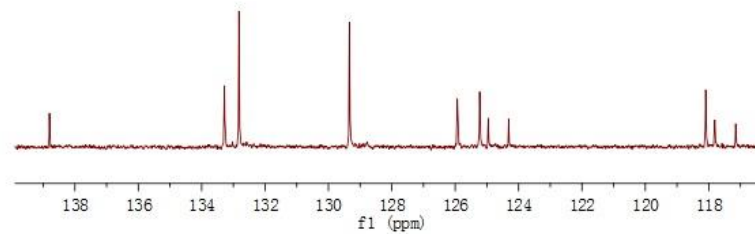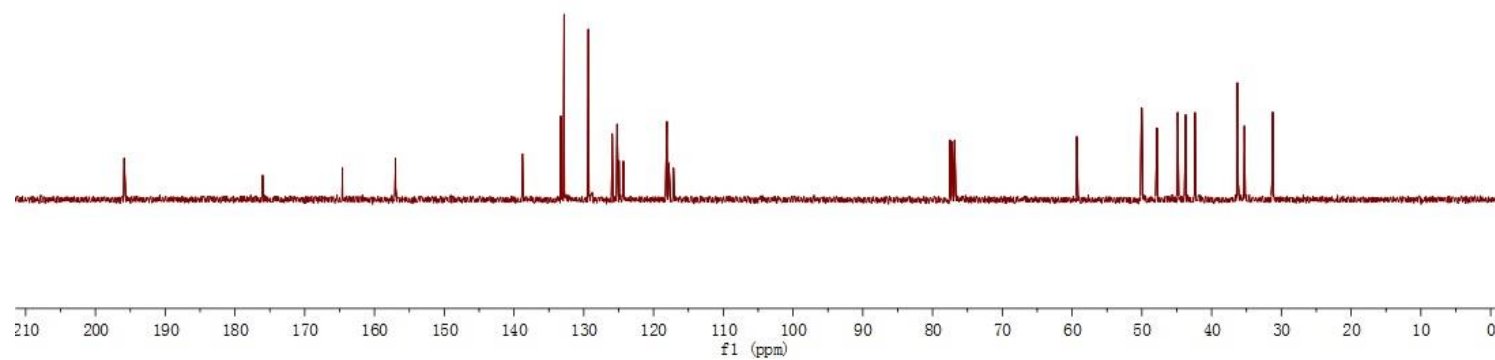

ysy-233-H

8.4094  
8.3883  
8.2301  
8.2156  
8.2105  
7.6090  
7.5909  
7.5727  
7.3694  
7.3606  
7.3617  
7.3090  
7.2880  
7.2596

4.4972  
4.4903  
4.4839

3.6635  
3.6656

2.8006  
2.7946  
2.7860  
2.7759  
2.7542  
2.7428  
2.4085  
2.3966

2.0601  
2.0510  
1.8960  
1.8868  
1.8560  
1.8046  
1.7528  
1.6002  
1.5725  
1.4791  
1.4690  
1.4453  
1.4177  
1.2779  
1.2518  
1.0241  
1.0054  
1.09846  
Ln axes

Scheme 2, 4y

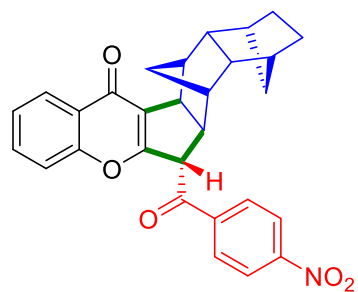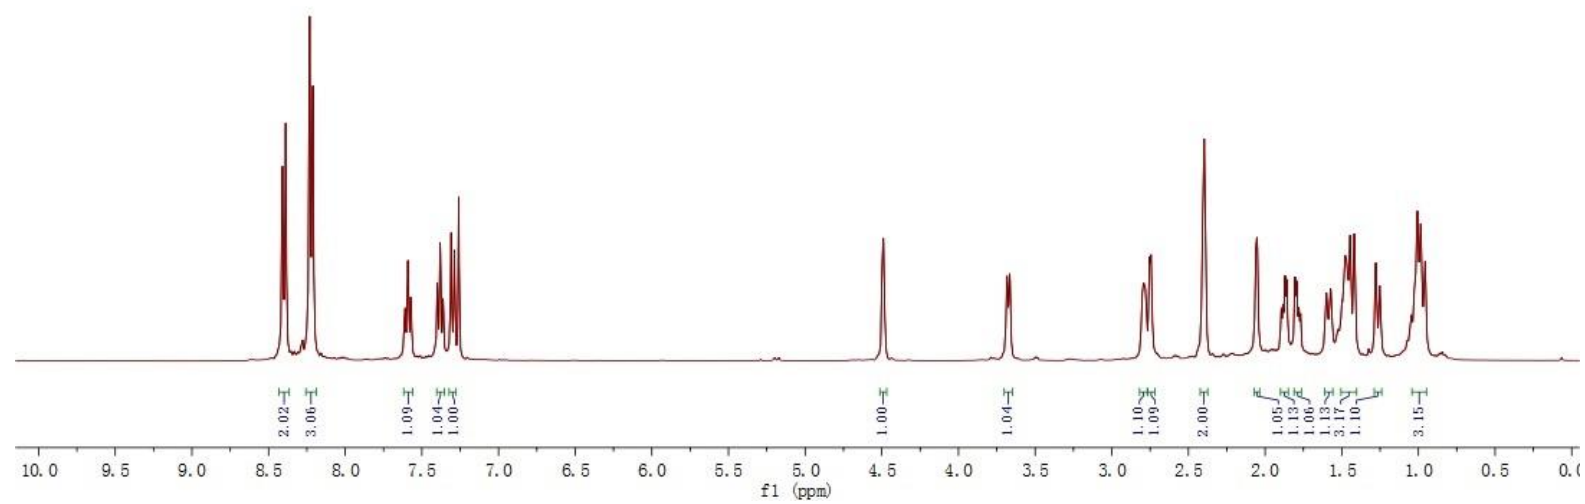

ysy-233-C

—195.7213

—176.0953

—164.4657

—157.0370

—150.8304

—140.3314

—133.3454

—130.0330

—126.0322

—125.3044

—125.0512

—124.3939

—124.2244

—118.1362

77.4791

77.1604

76.8417

—59.6273

—50.1179

—50.0661

—47.9329

—44.9408

—43.7719

—42.4366

—36.3601

—36.2812

—35.3417

—31.3349

—31.2939

### Scheme 2, 4y

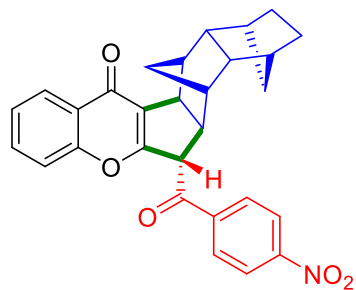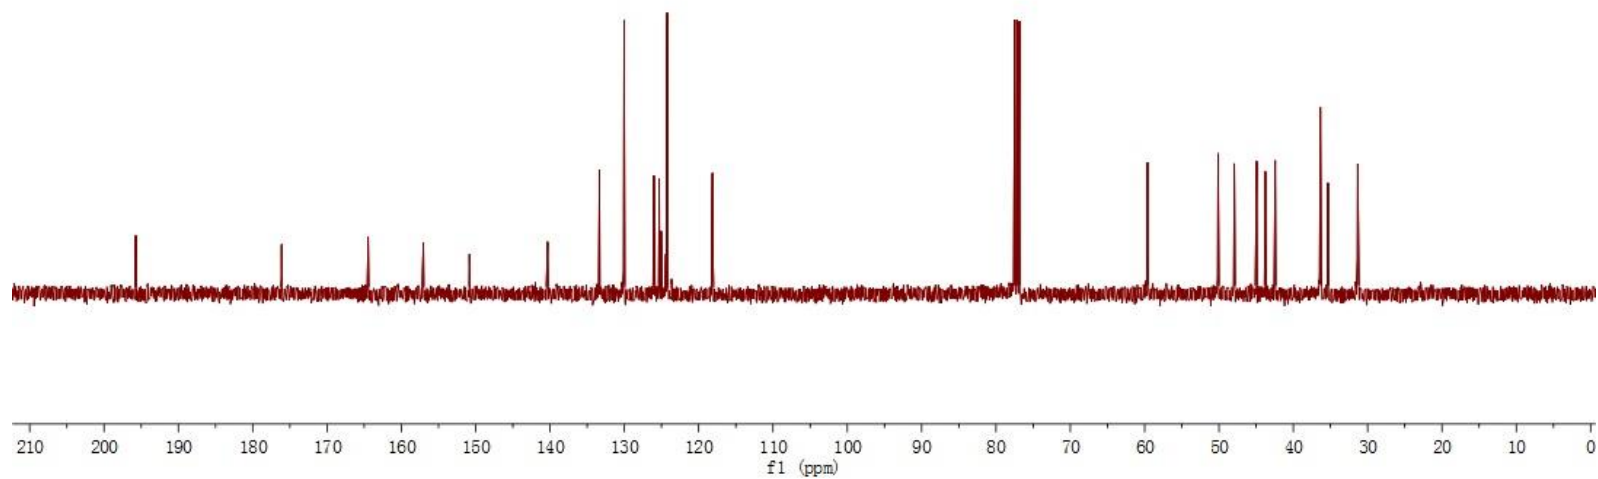

ysy-238-1-2-H

8.2361  
8.2162  
7.6662  
7.6457  
7.5148  
7.3653  
7.3401  
7.3184  
7.2588  
6.9475  
6.9306  
6.9272

6.0981

4.4034  
4.3976  
4.3923

3.6633  
3.6456

2.7588  
2.7450  
2.7330  
2.4030  
2.3928

2.0859  
2.0771  
1.8548  
1.8429  
1.7889  
1.7773  
1.6351  
1.6072  
1.4818  
1.4715  
1.4227  
1.3968  
1.2387  
1.2131  
1.0057  
0.9743  
0.9474

Scheme 2, 4z

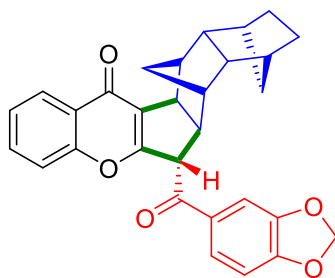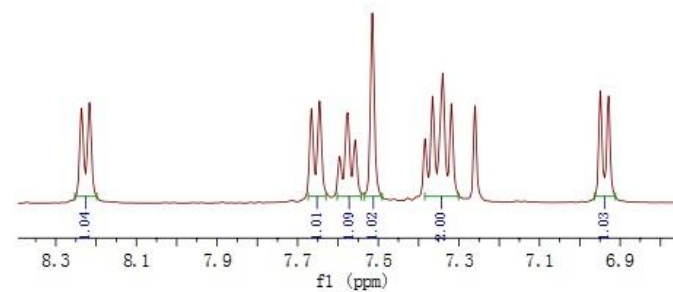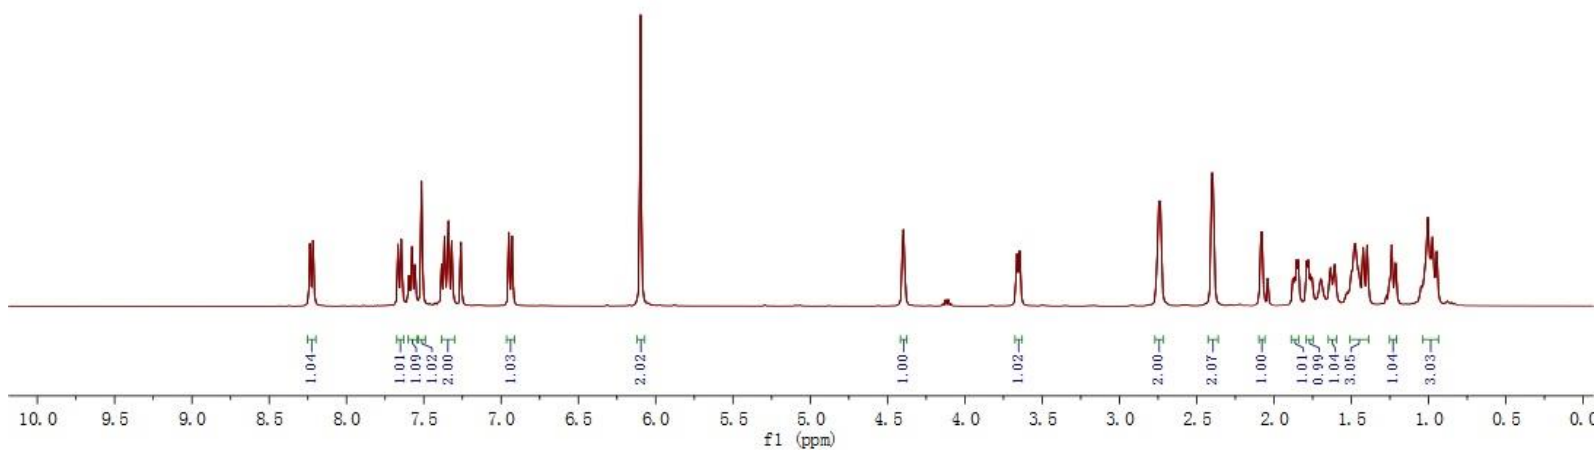

vsy-238-1-C  
y1

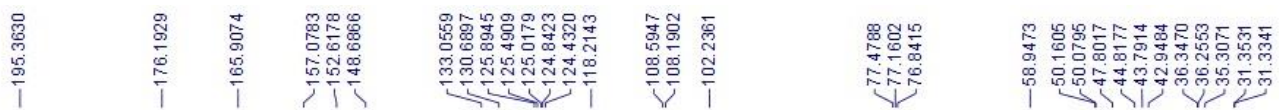

Scheme 2, 4z

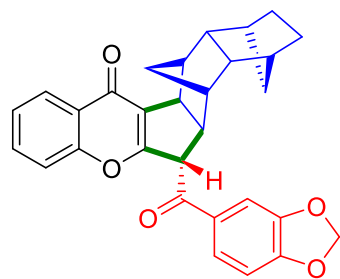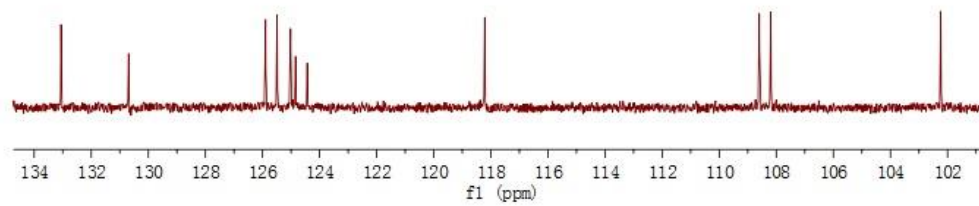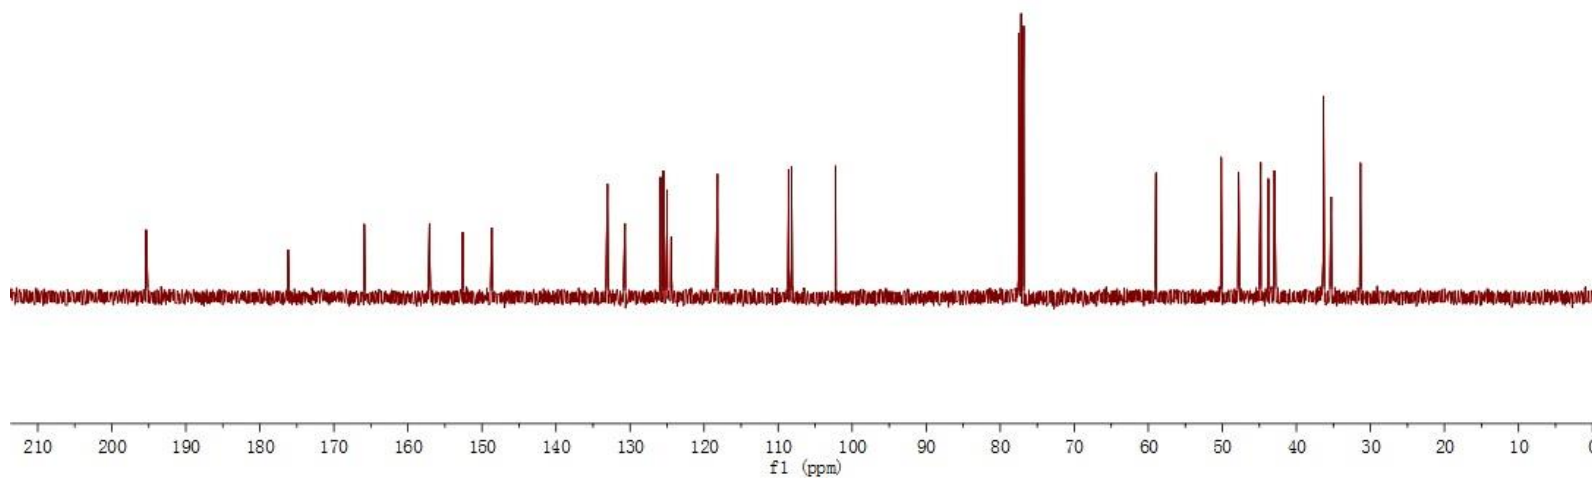



lmz-6-H

8.6077  
8.6026  
8.7554  
8.2510  
8.2353  
8.2311  
8.1237  
8.1191  
8.1019  
8.0974  
8.0609  
8.0408  
7.9896  
7.9679  
7.9441  
7.9239  
7.8868  
7.6889  
7.6497  
7.6355  
7.5941  
7.5824  
7.5781  
7.5613  
7.5484  
7.5391  
7.5330  
7.5640  
7.5451  
7.5124  
7.2913  
7.2601

4.6784  
4.6736  
4.6696  
4.6647  
3.7159  
3.6982  
2.8738  
2.8645  
2.8546  
2.8461  
2.7830  
2.7716  
2.5151  
2.5035  
2.4091  
2.3994  
2.0418  
2.0314  
1.8965  
1.8945  
1.8945  
1.8562  
1.8072  
1.7954  
1.7823  
1.7705  
1.6457  
1.6180  
1.5097  
1.4840  
1.4674  
1.4579  
1.4481  
1.4385  
1.4284  
1.4184  
1.3906  
1.2907  
1.2847  
1.0508  
1.0441  
1.0295  
1.0186  
1.0174  
1.0150  
1.0125

Scheme 2, 4aa

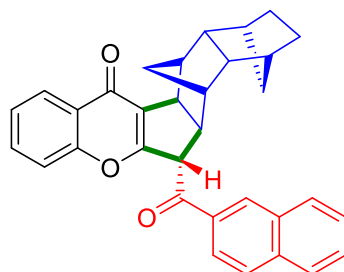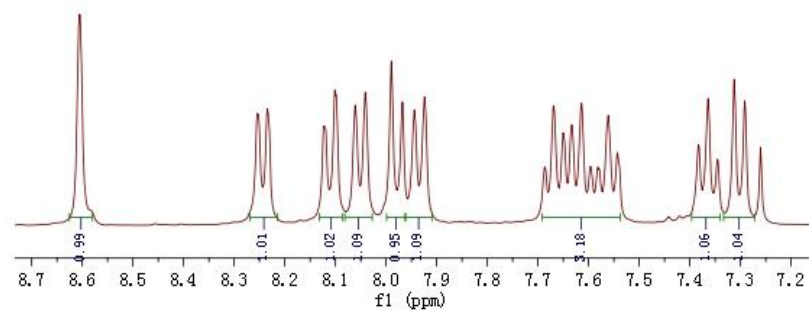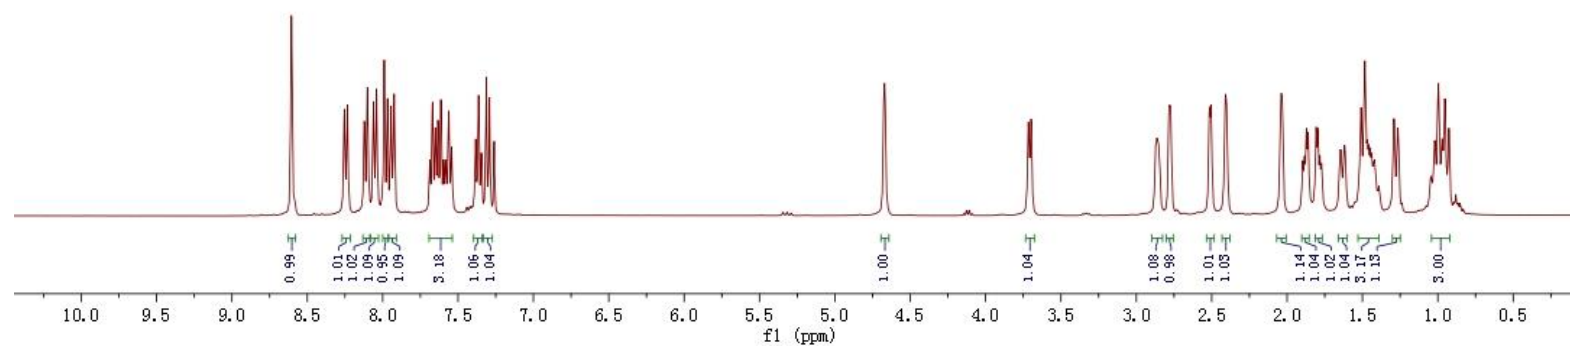

lmz-6-C

137.2247

176.2038

165.7896

157.1030

135.9927

135.2171

135.0805

132.8225

131.8990

129.8595

128.9805

127.9843

127.2166

125.9240

125.0471

124.9594

124.4803

124.3578

118.2323

77.4765

77.1598

76.8416

59.1468

50.1837

50.1068

47.9128

44.9043

43.8379

42.9020

36.3562

36.3272

35.3126

31.3447

Scheme 2, 4aa

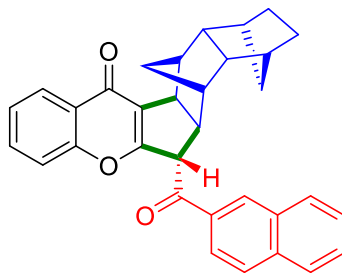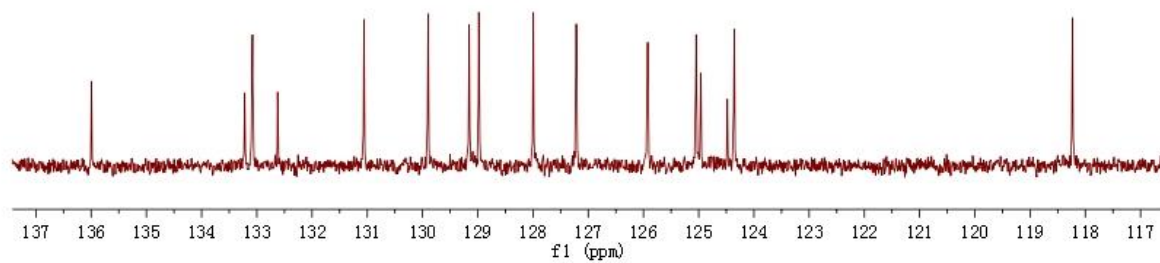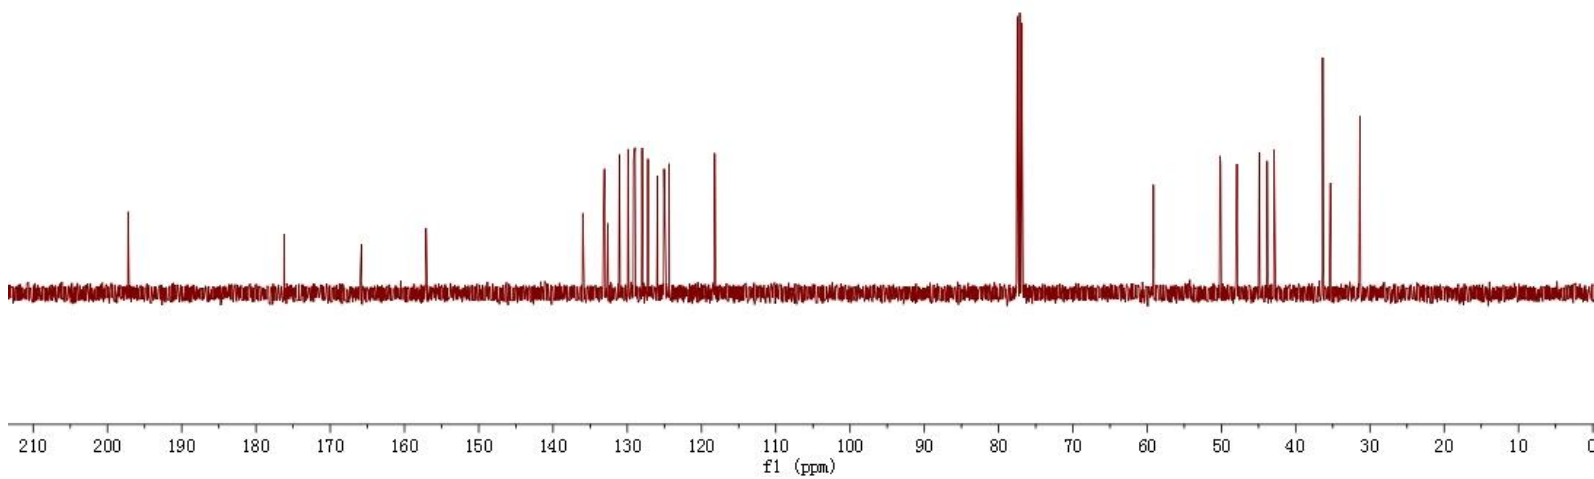

vsy-242-1-

8.2265  
8.2215  
8.2058  
8.2016  
7.8522  
7.8426  
7.7558  
7.7434  
7.5915  
7.5874  
7.5701  
7.5525  
7.5483  
7.3757  
7.3668  
7.3355  
7.3135  
7.2599  
7.2212  
7.2103  
7.1992

4.2915  
4.2850  
4.2777

3.6781  
3.6603

2.8593  
2.8498  
2.8396  
2.8311  
2.7297  
2.7182

2.3946  
2.3860

2.1103  
2.1014

1.8745  
1.8484

1.8364  
1.7794

1.7677  
1.6108

1.4764  
1.4669

1.3959  
1.3699

1.2336  
1.2075

0.9984  
0.9799

Scheme 2, 4ab

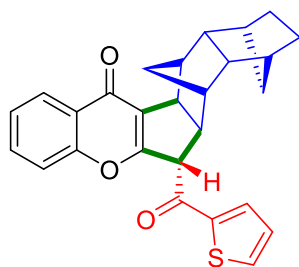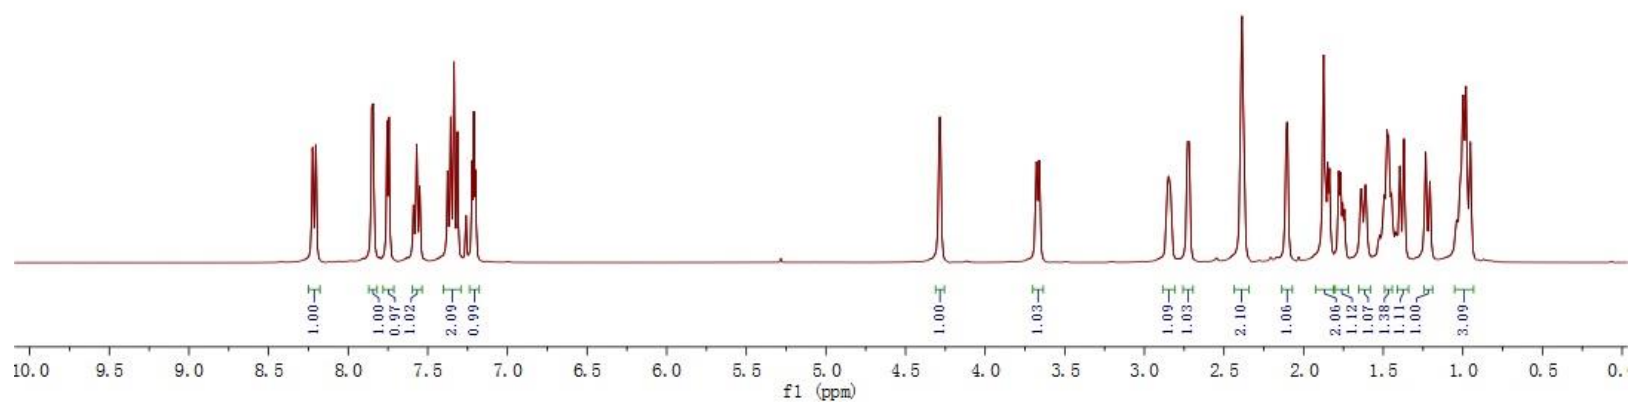

ysy-242-1-C  
y1

—189.9635

—176.2228

—165.1568

—157.0490

—143.1070

—135.2435

—133.1565

—133.1278

—128.6495

—125.8874

—125.0940

—125.0077

—124.4036

—118.2415

—77.4792

—77.1606

—76.8428

—60.7871

—50.1498

—50.0908

—47.9797

—44.8781

—43.7574

—43.1535

—36.3630

—36.3427

—36.1926

—35.3057

—31.3394

Scheme 2, 4ab

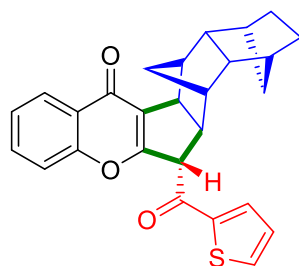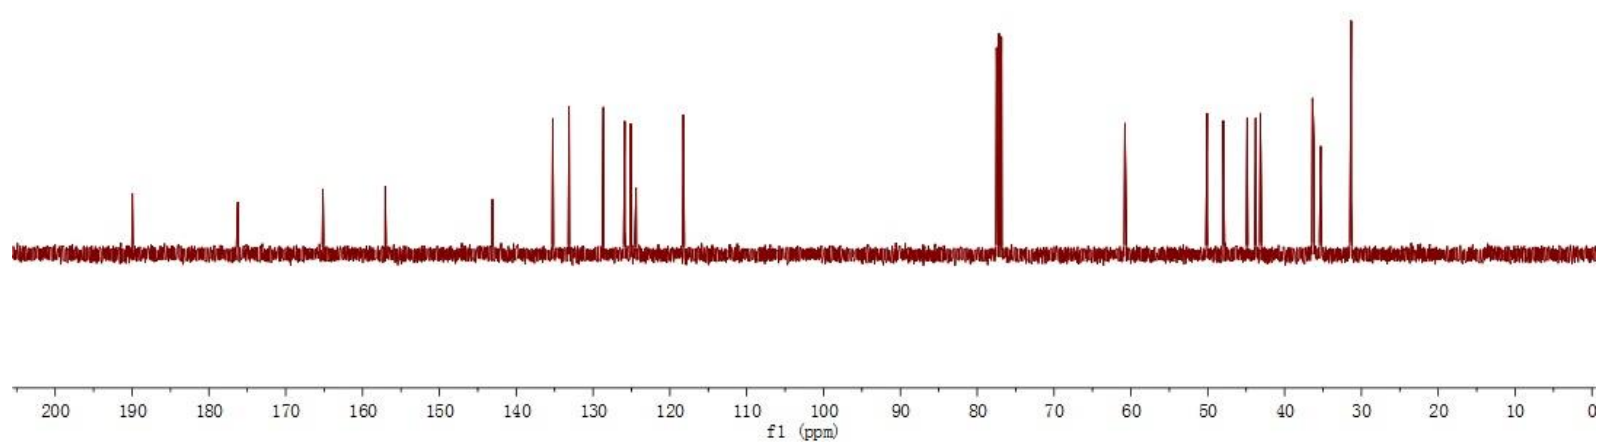

vsy-241-1-H

8.2396  
8.2197  
7.7753  
7.7557  
7.6566  
7.6423  
7.6214  
7.5878  
7.5681  
7.5517  
7.5355  
7.5153  
7.3793  
7.3605  
7.3417  
7.3279  
7.3069  
7.2599

4.4412  
4.4342  
4.4279

3.7061  
3.6882

2.8839  
2.8739  
2.8654  
2.7566  
2.7452  
2.4992  
2.4877  
2.4054  
2.3961  
2.0916  
2.0825  
1.8639  
1.8522  
1.8031  
1.7911  
1.6398  
1.6119  
1.4660  
1.4468  
1.4203  
1.2691  
1.2420  
1.0241  
1.0039  
0.9719  
0.9449

### Scheme 2, 4ac

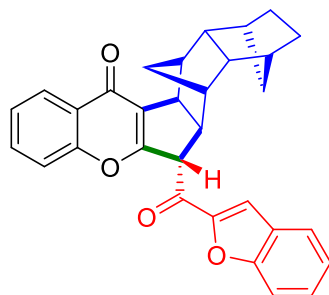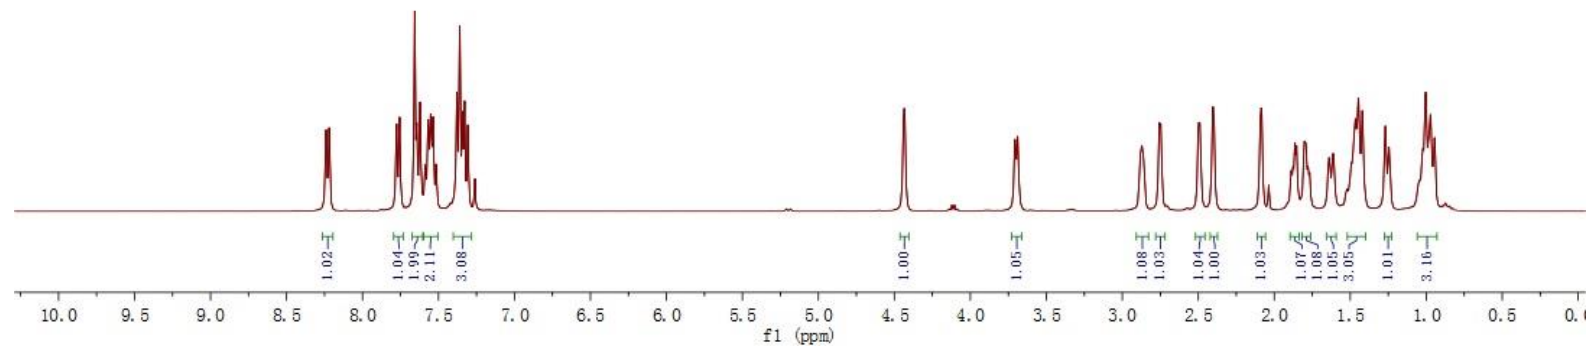

ysy-241-1-C  
y1

188.0093

176.1899

164.8420

157.0941

156.1188

151.7438

133.1596

128.9983

127.1007

125.9250

125.2114

125.0984

124.4610

124.3538

123.7064

118.2460

114.6603

112.6527

77.4770

77.1595

76.8418

60.1291

50.1796

50.1083

47.9874

44.9029

43.8556

42.9920

36.4033

36.3372

36.1861

35.2856

31.3578

### Scheme 2, 4ac

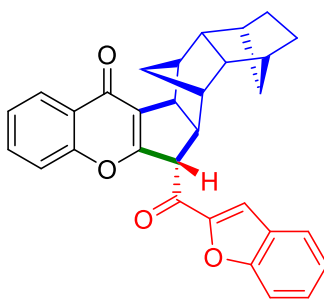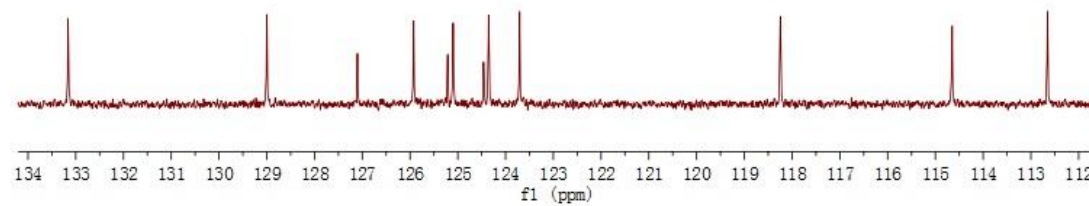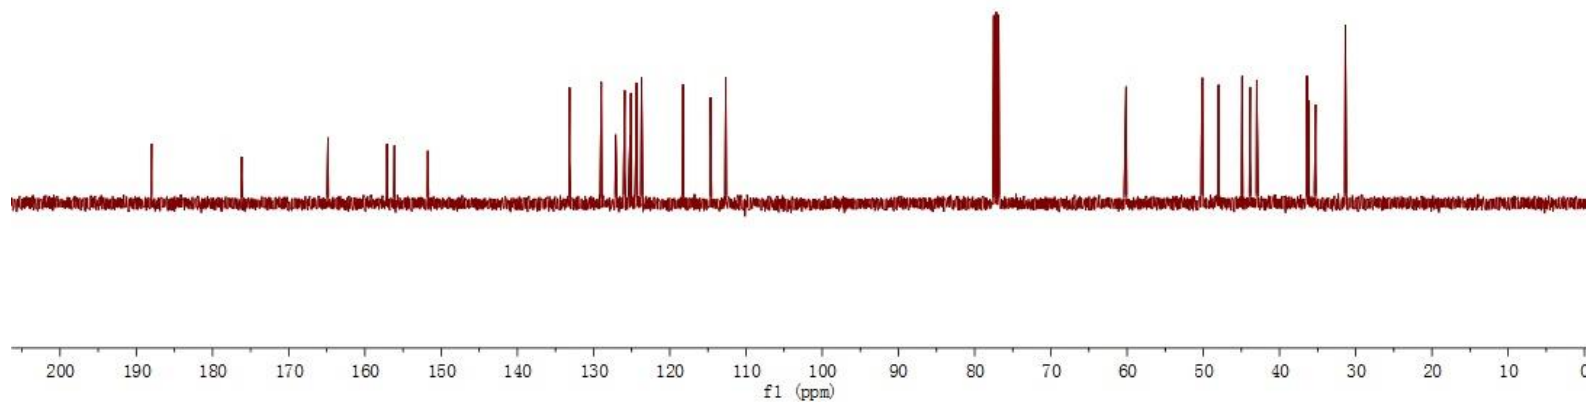

vsy-261-H

8.2283  
8.2241  
8.2083  
8.2041  
7.6355  
7.6313  
7.6138  
7.5964  
7.5922  
7.4316  
7.4105  
7.3955  
7.3766  
7.3578  
7.2601

4.2639  
4.2588  
4.2458  
4.2412  
4.2277  
4.2231  
4.2100  
4.2052  
3.6052  
3.5870  
3.5346  
3.5270  
3.5204

2.8052  
2.7960  
2.6636  
2.6521  
2.3946  
2.2692  
2.2578  
2.2225

1.8302  
1.8181  
1.7644  
1.7526  
1.6495  
1.5119  
1.4948  
1.3093  
1.2916  
1.2738  
1.2395  
1.2130  
1.1646  
1.0311  
1.0004

Scheme 2, 4ad

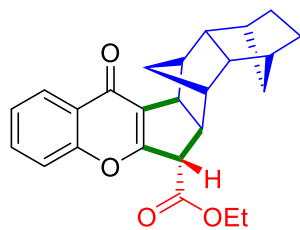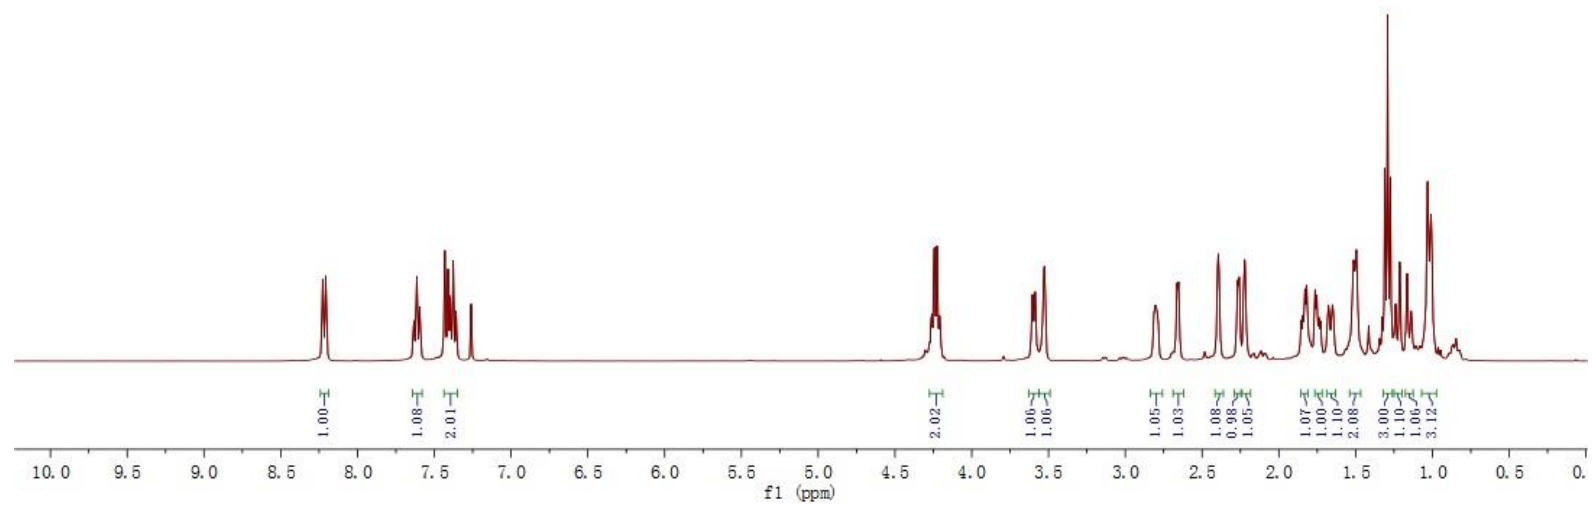

ysy-261-C  
y1

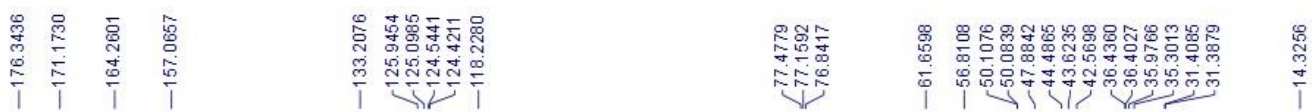

Scheme 2, 4ad

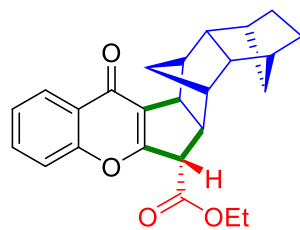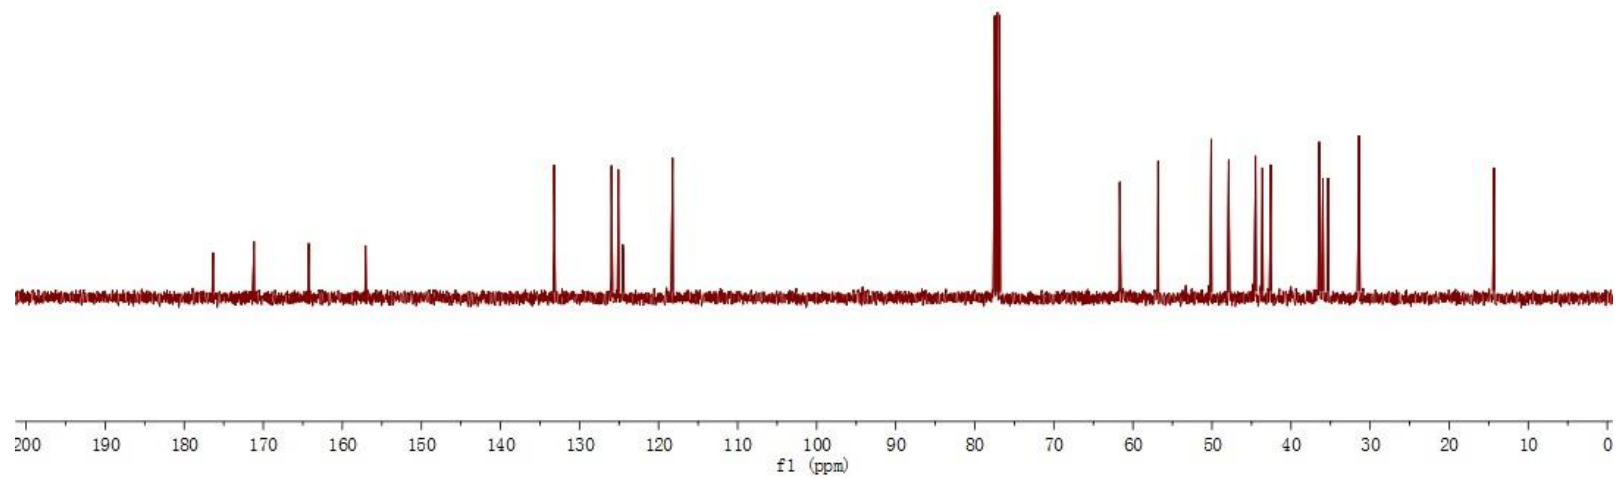



ysy-239-1-2-H

8.2211  
8.2170  
8.2011  
8.1970  
7.8221  
7.8029  
7.7276  
7.7090  
7.6904  
7.5861  
7.5669  
7.5438  
7.5397  
7.5219  
7.5046  
7.5006  
7.4889  
7.4703  
7.4517  
7.3582  
7.3393  
7.3204  
7.2602  
7.1975  
7.1765

3.8264  
3.8086  
3.5956  
3.5515  
3.5118  
3.4678  
2.8179  
2.8002  
2.7989  
2.7479

2.4420  
2.4330  
2.2946  
2.2828  
2.0580  
2.0499  
2.0440  
1.8298  
1.8176  
1.7958  
1.7824  
1.4871  
1.3067  
1.2810  
1.2040  
1.1787  
1.0308  
1.0054

Scheme 3, 4ae

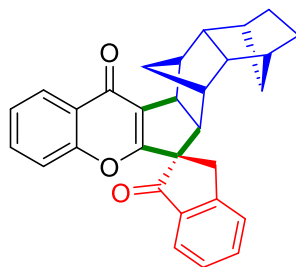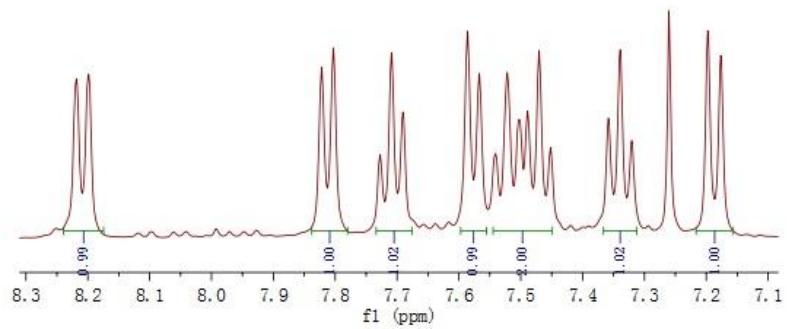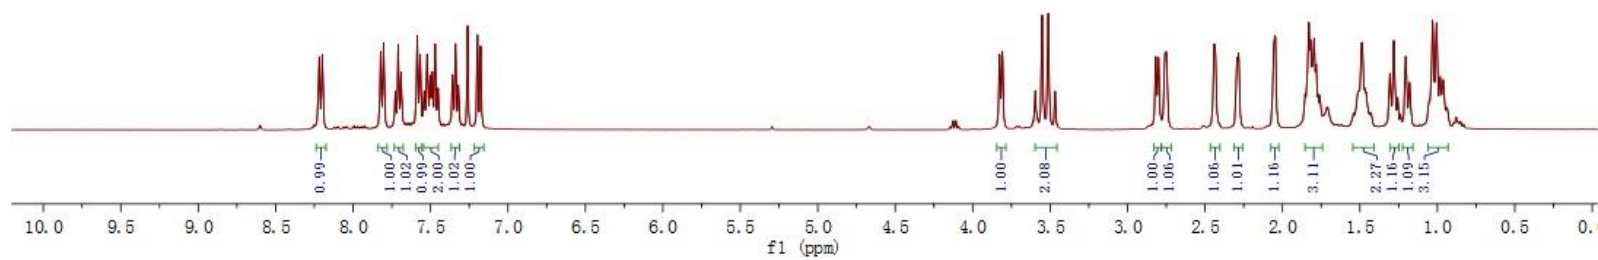

ysy-239-1  
y1

—205.4341

—176.1416

—167.7450

—156.8532  
—153.2922

—135.7173  
—134.8413  
—132.9763  
—128.1742  
—126.4756  
—125.9275  
—125.1005  
—125.0179  
—124.5431  
—123.8620  
—118.0859

—77.4787  
—77.1607  
—76.8427

—64.3631

—50.1687  
—49.9346  
—45.4864  
—44.7467  
—43.4393  
—43.0369  
—36.9645  
—36.3880  
—36.2741  
—35.4622  
—33.0805  
—31.4415  
—31.4039

Scheme 3, 4ae

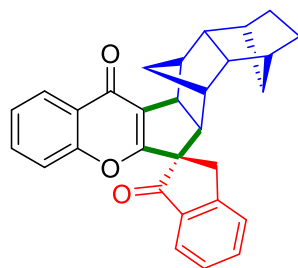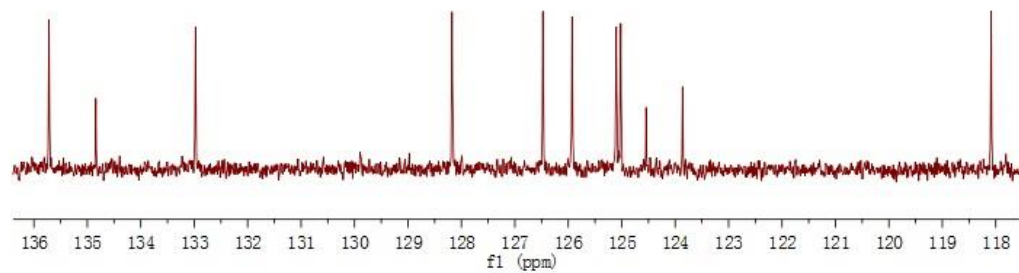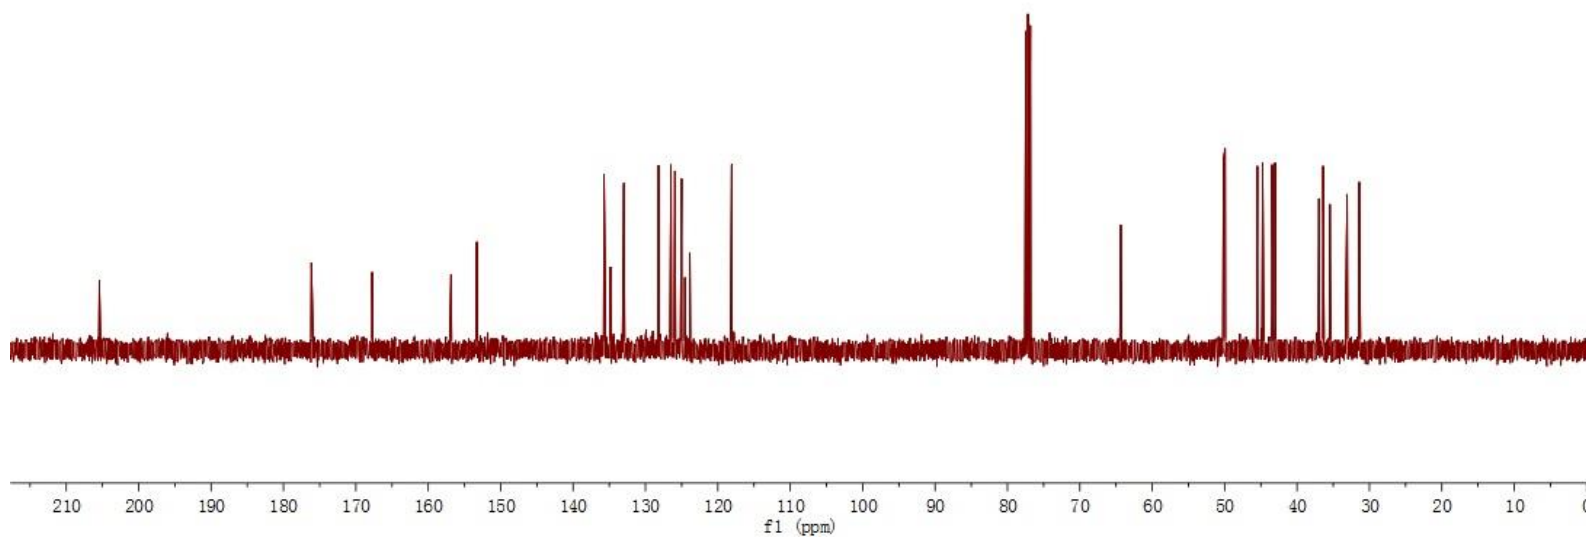

ysy-240-2-1-H

8.2115  
8.1918  
8.0228  
8.0033  
7.5440  
7.5251  
7.5061  
7.3468  
7.3279  
7.3077  
7.2875  
7.2601  
7.2386  
7.2336

3.6972  
3.6797  
3.2466  
3.2237  
3.2115  
3.1989  
2.7411  
2.7072  
2.6906  
2.3885  
2.3780  
2.0369  
2.0278  
1.8142  
1.8030  
1.7770  
1.7648  
1.6811  
1.5937  
1.4485  
1.3565  
1.3312  
1.1714  
1.1461  
0.9734  
0.9529

Scheme 3, 4af

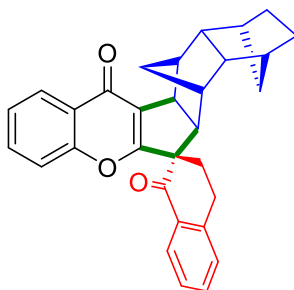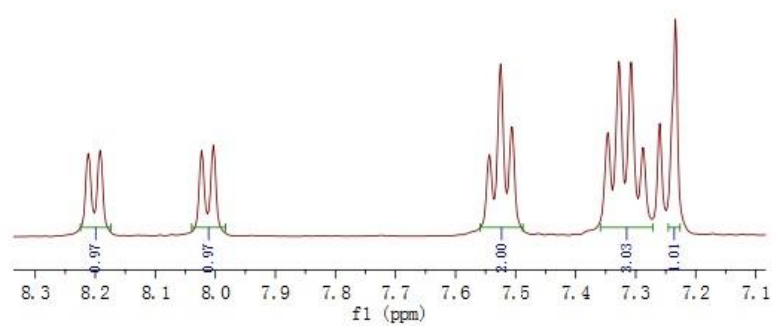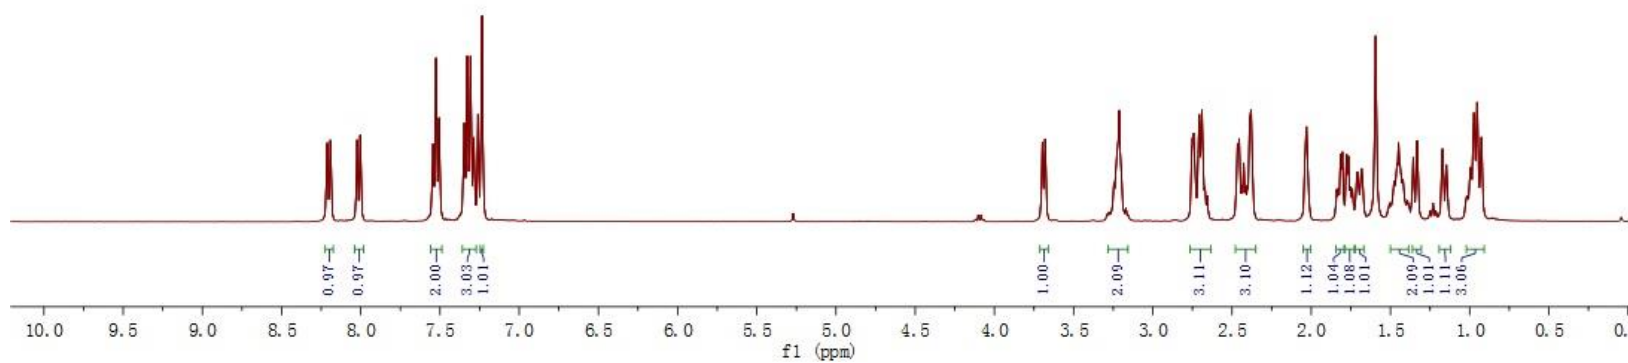

vsy-240-2-C  
y1

—197.2148

—176.1579

—168.2919

—156.9364

—143.8792

134.1179

132.9035

128.8541

128.7218

127.1462

125.9726

124.9762

118.9513

77.4769

77.1602

76.8433

—60.4293

50.2482

50.2183

45.0544

44.8840

42.9748

42.0835

37.8041

36.4418

36.1860

35.5457

31.4837

31.3715

26.2309

25.6061

Scheme 3, 4af

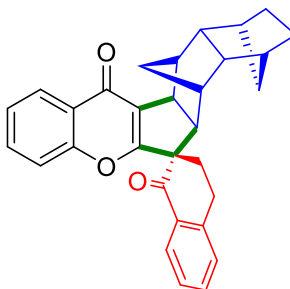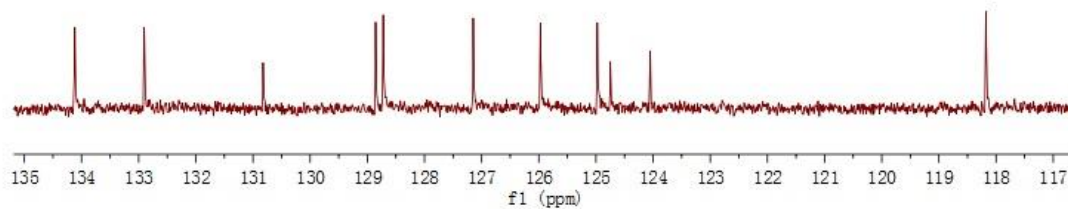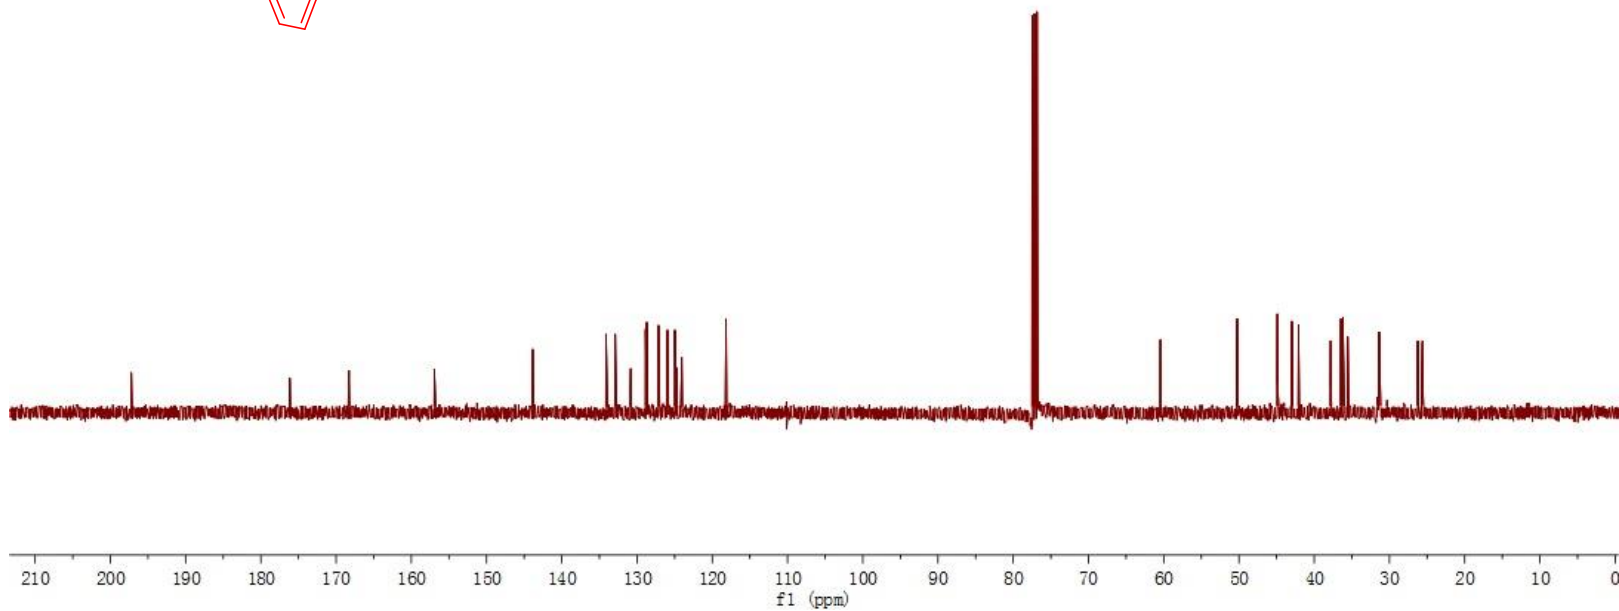

Supplement: c9ob02690h1.pdf [file c9ob02690h1.pdf]
